# Supplementary material
Source: PubMed Central journal article supplement (PMC6736725)
Supplement: NIHMS1034733-supplement-Supp_info1.pdf [file NIHMS1034733-supplement-Supp_info1.pdf]

# 1 Supplementary Information

## 2 3 **The ligand-binding domain of a chemoreceptor from *Comamonas testosteroni* has a** 4 **previously unknown homotrimeric structure**

5 Running title: trimeric structure of MCP2201LBD

6 Yuan Hong<sup>1,2,3#</sup>, Zhou Huang<sup>1,3#</sup>, Lu Guo<sup>1</sup>, Bin Ni<sup>1</sup>, Cheng-Ying Jiang<sup>1</sup>, Xiao-Jing Li<sup>1</sup>,

7 Yan-Jie Hou<sup>2</sup>, Wen-Si Yang<sup>2</sup>, Da-Cheng Wang<sup>2</sup>, Igor B. Zhulin<sup>4</sup>, Shuang-Jiang Liu<sup>1,3\*</sup>,

8 De-Feng Li<sup>1,3\*</sup>

9  
10 <sup>1</sup>State Key Laboratory of Microbial Resources, Institute of Microbiology, Chinese

11 Academy of Sciences, No.1 Beichen West Road, Chaoyang District, Beijing 100101,

12 China

13 <sup>2</sup>National Laboratory of Biomacromolecules, CAS Center for Excellence in

14 Biomacromolecules, Institute of Biophysics, Chinese Academy of Sciences, Beijing

15 100101, China

16 <sup>3</sup>University of Chinese Academy of Sciences, Beijing 100049, China

17 <sup>4</sup>Department of Microbiology, Ohio State University, Columbus, OH 43210, USA

18 #These authors contributed equally.

19 \*For correspondence. E-mail [liddefeng@im.ac.cn](mailto:liddefeng@im.ac.cn) (D.-F.L.); [liusj@im.ac.cn](mailto:liusj@im.ac.cn) (S.-J.L.); Tel.

20 (+86) 10 64807423; Fax (+86) 10 64807421.

### 21 **This PDF file includes:**

22  
23 Figures S1 to S4

24 Tables S1 to S2

25 Dataset S1

26

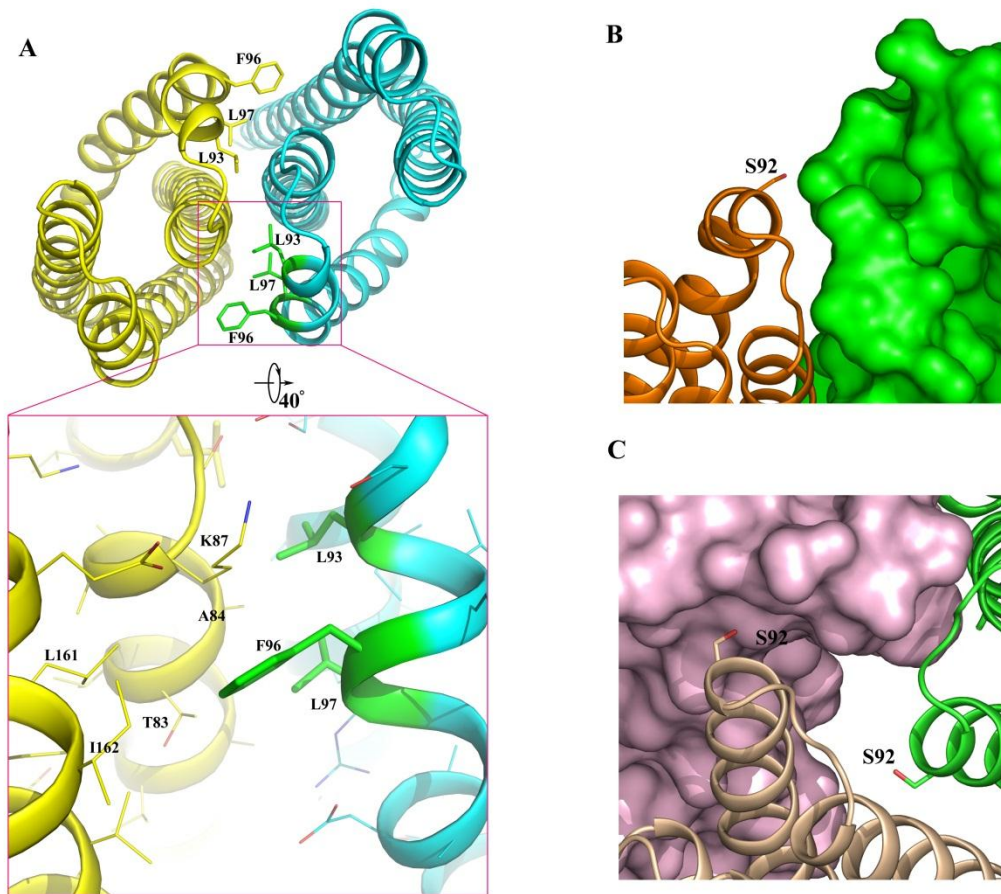

27

28 **Figure S1. Locations of residues L93, F96, L97 and S92 at dimer and/or trimer interface.** (A)  
 29 A top view and enlargement of apo dimer structure of MCP2201 LBD show that residue L93,  
 30 F96 and L97 do not pack against any hydrophobic residue of the other protomer. The locations of  
 31 these residues in trimeric interface are shown in Figure 3D. (B) Residue S92 locates at the apo  
 32 dimer interface, yet is solvent accessible. (C) S92 occupies in the trimer interface the full space  
 33 where cannot tolerate amino acid residues with large side chain. Different chains are shown in  
 34 different colors.  
 35

36

A

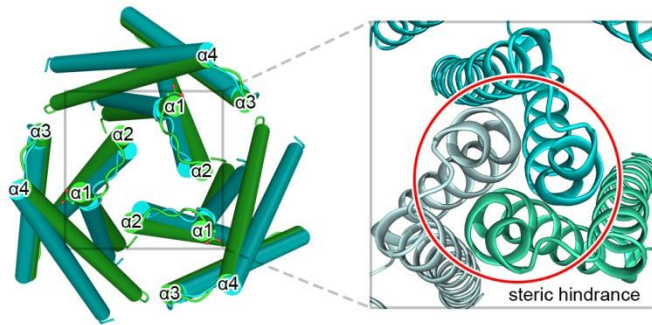

B

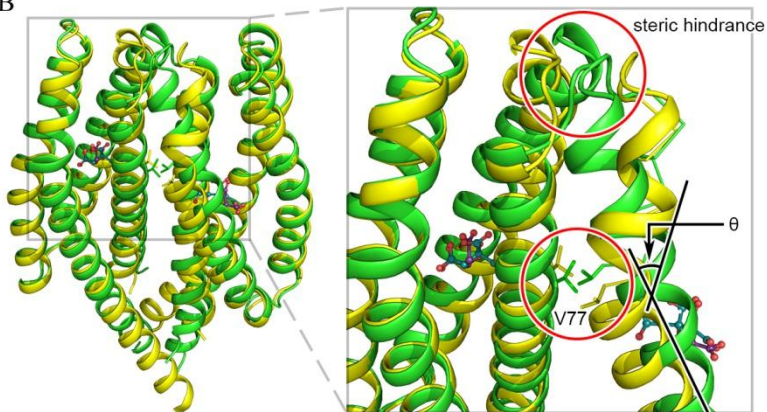

37  
38

39 **Figure S2. Steric hindrance observed in the modelled ligand-free trimer and citrate-bound**  
40 **dimer.** (A) Three ligand-free (cyan) LBD protomers are superposed into citrate-bound (green)  
41 TOM, displaying significant steric hindrance (ringed by red circles) in the trimer interface. Three  
42 protomers of ligand-free LBD are distinguished by colors in the enlarged views. (B) Two citrate-  
43 bound (green) LBD protomers are superposed into ligand-free (yellow) LBD dimer, displaying  
44 significant steric hindrance (ringed by red circles) in the dimeric interface.

45  
46







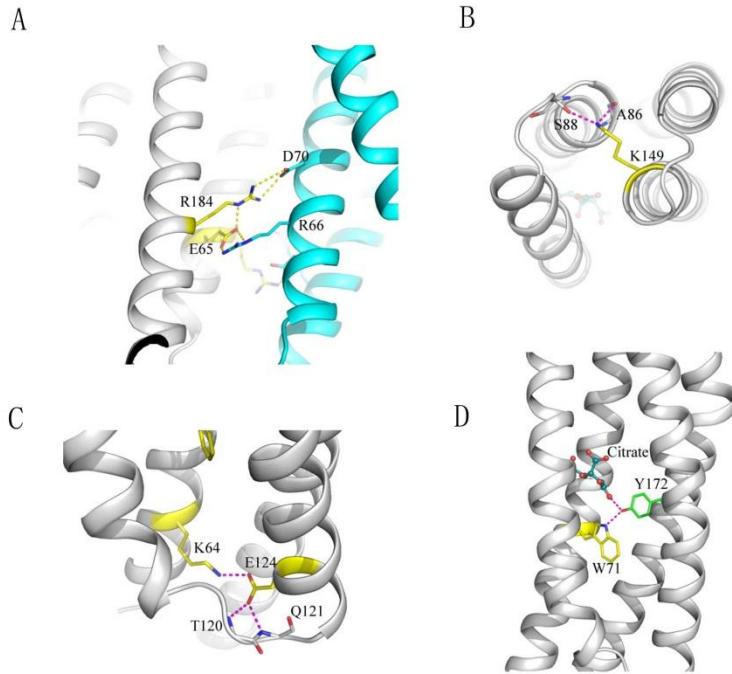

260  
261

262 **Figure S4. A close inspection of conserved residues E65, R66, D70 (A), K149 (B), E124 (C)**  
 263 **and W71 (D).**  
 264  
 265

Table S1. Data Collection and Refinement Statistics.

|                                          | MCP2201LBD (ligand-free) | MCP2201LBD-citrate complex 1 | MCP2201LBD-citrate complex 2 |
|------------------------------------------|--------------------------|------------------------------|------------------------------|
| <b>Data collection</b>                   |                          |                              |                              |
| <b>Space group</b>                       | P 1 2 <sub>1</sub> 1     | H 3                          | H 3                          |
| <b>Cell dimensions</b>                   |                          |                              |                              |
| a, b, c (Å)                              | 64.78, 105.03, 91.07     | 49.40, 49.40, 406.34         | 48.86, 48.86, 376.15         |
| $\alpha$ , $\beta$ , $\gamma$ (°)        | 90.00, 90.95, 90.00      | 90.00, 90.00, 120.00         | 90.00, 90.00, 120.00         |
| <b>Resolution (Å)</b>                    | 55.13–2.80 (2.95–2.80)   | 45.15–2.50 (2.64–2.50)       | 42.05–2.50 (2.60–2.50)       |
| <b>R<sub>merge</sub></b>                 | 0.107 (0.643)            | 0.152 (0.291)                | 0.126 (0.557)                |
| <b>R<sub>meas</sub></b>                  | 0.126 (0.753)            | 0.187 (0.384)                | 0.148 (0.663)                |
| <b>R<sub>pim</sub></b>                   | 0.066 (0.389)            | 0.107 (0.248)                | 0.075 (0.353)                |
| <b>I/<math>\sigma</math>(I)</b>          | 7.7 (2.3)                | 4.3 (2.2)                    | 6.6 (2.3)                    |
| <b>CC<sub>1/2</sub></b>                  | 0.994 (0.700)            | 0.953 (0.791)                | 0.987 (0.762)                |
| <b>Completeness (%)</b>                  | 99.5 (99.8)              | 94.5 (94.0)                  | 95.7 (92.2)                  |
| <b>Redundancy</b>                        | 3.6 (3.7)                | 2.3 (1.9)                    | 3.3 (3.0)                    |
| <b>Refinement</b>                        |                          |                              |                              |
| <b>Resolution (Å)</b>                    | 55.13–2.80               | 45.15–2.50                   | 42.05–2.50                   |
| <b>No. reflections</b>                   | 28676                    | 12091                        | 10730                        |
| <b>R<sub>work</sub>/R<sub>free</sub></b> | 0.224 / 0.285            | 0.203 / 0.256                | 0.184 / 0.245                |
| <b>No. Non-H atoms</b>                   |                          |                              |                              |
| Protein                                  | 8363                     | 2167                         | 2231                         |
| Ligand/ion                               | -                        | 36                           | 36                           |
| Water                                    | -                        | 95                           | 60                           |
| <b>B factors</b>                         |                          |                              |                              |
| Protein                                  | 68.6                     | 37.0                         | 53.1                         |
| Ligand/ion                               | -                        | 51.3                         | 54.6                         |
| Water                                    | -                        | 35.8                         | 47.6                         |
| <b>R.m.s. deviations</b>                 |                          |                              |                              |
| Bond lengths (Å)                         | 0.009                    | 0.007                        | 0.008                        |
| Bond angles (°)                          | 1.321                    | 0.983                        | 1.019                        |
| <b>Ramachandran plot</b>                 |                          |                              |                              |
| Favored                                  | 96.87%                   | 96.09%                       | 97.58%                       |
| Allowed                                  | 3.13%                    | 3.91%                        | 2.42%                        |
| Outliers                                 | 0%                       | 0%                           | 0%                           |

Values in parentheses refer to the highest resolution shell.

268 **Table S2. Strains and plasmids used in this study**

269

| Strains/plasmids              | Relevant genotype or description                                                                                                                                                                                 | Source                        |
|-------------------------------|------------------------------------------------------------------------------------------------------------------------------------------------------------------------------------------------------------------|-------------------------------|
| <b>Strains</b>                |                                                                                                                                                                                                                  |                               |
| <i>Comamonas testosteroni</i> |                                                                                                                                                                                                                  |                               |
| CNB-1                         |                                                                                                                                                                                                                  | (Wu <i>et al.</i> , 2006)     |
| CNB-1Δ20                      | All putative chemoreceptor genes were disrupted in strain CNB-1                                                                                                                                                  | (Ni <i>et al.</i> , 2013)     |
| <i>Escherichia coli</i>       |                                                                                                                                                                                                                  |                               |
| DH5α                          | F ϕ80d <i>lacZ</i> ΔM15 Δ ( <i>lacZYA-argF</i> ) U169 <i>recA1 endA1 hsdR17</i> (r <sub>K</sub> <sup>-</sup> m <sub>K</sub> <sup>+</sup> ) <i>supE44 λ- thi-1 gyrA96 relA1 phoA</i> ; host for DNA manipulations | (Hanahan, 1983)               |
| BL21(DE3)                     | F <i>ompT hsdS<sub>B</sub></i> (r <sub>B</sub> <sup>-</sup> m <sub>B</sub> <sup>-</sup> ) <i>gal dcm</i> (DE3)                                                                                                   | Novagen                       |
| <b>Plasmids</b>               |                                                                                                                                                                                                                  |                               |
| pBBR1MCS-2                    | Km <sup>r</sup> , <i>lacPOZ</i> ' broad host vector with R type conjugative origin                                                                                                                               | (Kovach <i>et al.</i> , 1995) |
| pBBR1MCS2-MCP2201             | Carries MCP2201 as well as its upstream 150 bp DNA, used for chemotaxis assays                                                                                                                                   | (Ni <i>et al.</i> , 2013)     |
| pBBR1MCS2-MCP2201-R81A        | Carries MCP2201 with R81A mutation                                                                                                                                                                               | This work                     |
| pBBR1MCS2-MCP2201-T104A       | Carries MCP2201 with T104A mutation                                                                                                                                                                              | This work                     |
| pBBR1MCS2-MCP2201-T108A       | Carries MCP2201 with T108A mutation                                                                                                                                                                              | This work                     |
| pBBR1MCS2-MCP2201-R135A       | Carries MCP2201 with R135A mutation                                                                                                                                                                              | This work                     |
| pBBR1MCS2-MCP2201-Y138A       | Carries MCP2201 with Y138A mutation                                                                                                                                                                              | This work                     |
| pBBR1MCS2-MCP2201-R142A       | Carries MCP2201 with R142A mutation                                                                                                                                                                              | This work                     |
| pBBR1MCS2-MCP2201-Y172A       | Carries MCP2201 with Y172A mutation                                                                                                                                                                              | This work                     |
| pBBR1MCS2-MCP2201-L93R        | Carries MCP2201 with L93R mutation                                                                                                                                                                               | This work                     |
| pBBR1MCS2-MCP2201-F96A        | Carries MCP2201 with F96A mutation                                                                                                                                                                               | This work                     |
| pBBR1MCS2-MCP2201-L97A        | Carries MCP2201 with L97A mutation                                                                                                                                                                               | This work                     |
| pBBR1MCS2-MCP2201-S88A        | Carries MCP2201 with R81A mutation                                                                                                                                                                               | This work                     |
| pBBR1MCS2-MCP2201-D90A        | Carries MCP2201 with D90A mutation                                                                                                                                                                               | This work                     |
| pBBR1MCS2-MCP2201-S92W        | Carries MCP2201 with S92W mutation                                                                                                                                                                               | This work                     |
| pBBR1MCS2-MCP2201-S92R        | Carries MCP2201 with S92R mutation                                                                                                                                                                               | This work                     |
| pBBR1MCS2-MCP2201-S73A        | Carries MCP2201 with S73A mutation                                                                                                                                                                               | This work                     |
| pBBR1MCS2-MCP2201-F96C-His    | Carries MCP2201 with F96C mutation and a C-terminal His-tag, used for TMEA crosslinking                                                                                                                          | This work                     |
| pET28a                        |                                                                                                                                                                                                                  |                               |
| pET28a- <i>mcp2201</i> LBD    | pET28a derivative for expression of MCP2201LBD, spanning residues Q46-T203 and used for citrate-bound structure determination and other assays.                                                                  | (Ni <i>et al.</i> , 2013)     |
| pET22b                        |                                                                                                                                                                                                                  |                               |
| pET22b- <i>mcp2201</i> LBD    | pET22b derivative for expression of MCP2201LBD, spanning residues M57-T203 and used for apo form structure determination.                                                                                        | This work                     |

270

271

272 **Dataset S1. Protein sequences of MCP2201 orthologs.**273 **Protein sequences of MCP2201 orthologs.** NCBI accession numbers are shown.

274



275 >Comamonas\_testosteroni\_1 |WP\_041744100.1 methyl-accepting chemotaxis  
276 protein [Comamonas testosteroni]  
277 MRLTKLNIGARLGLGFVAVLAFVAVITVIGIWLHLSVGKATQQMMQEPLTKERLISDWNSNVSVAVARTTA  
278 IAKSSDASLVQFLAADAATAKSTANVLKQIEPLITQPAEREILDKIMQVRKTYIASRDKVSQKADGMAE  
279 EAESTLINSYVPAAQGYLKLGLGELLNLQRASLDAKAAEVEQIESSRTYFLVLALLALAIGTVSAWRLTQG  
280 ITAPLKHAVSVARRVADGDLTARIHVSSSDETGQLMQALHDMNTSLDRLVGVQVRQGTDSIATASGQIAAGN  
281 HDLSARTEEQASSLQQTAAASMEQLTSTVKQNADNASQANQLALSASDVAVKGGMVVSQVVEITMGAISQSSR  
282 KISDIIGVIDSIAFQTNILALNAAVEAARAGEQGRGFVAVASEVRSLAGRSAAEAAKEIKQLIQASVTKVEE  
283 GSAQVSQAGQTMDEIVSSVQRVTDIMGEITAASHEQTSQIEQINRAVAEMDLVTQQNAALVEESTAAAQSM  
284 QQQTSDLQMVSVFRLKSA  
285 >Comamonas\_terrigena\_1 |WP\_066535939.1 HAMP domain-containing protein  
286 [Comamonas terrigena]  
287 MNFSKFNIGARLGLGFVAVLAFVAVITAIGMQLHLSVGKATQQMMQEPLTKERLISDWNSNVSVAVARTTA  
288 IAKSSDASLVFPLAADAATAKGTADV LKQIEPLISLPAEREIMDKIMAIRKTYIASRDKVSQKAEGLSE  
289 EAEATLVNAFVPAAQGYLKLSELLSLQRSGLDAKAAEVQAIENTSQTYFVILAVLALAIGAVSAWRLTQG  
290 ITAPLRNAVTVARRVADGDLSTDIRVTGTDETGQLLQALHDMNASLGRLVGVQVRQGTDSIATASSQIASGN  
291 HDLSSRTEEQASSLQQTAAASMEQLTSTVKQNADNASQANQLALSASDVAVKGGLVVSQVVEITMGAISTSSK  
292 KIADIIGVIDGIAFQTNILALNAAVEAARAGEQGRGFVAVASEVRSLAGRSAAEAAKEIKQLIQASVDKVEE  
293 GSLQVSQAGQTMDEIVSSVQRVTDIMGEITAASQEQTSGIEQINRAVAEMDLVTQQNAALVEESTAAAQSM  
294 QQQTGDLQMVSVFRLKHA  
295 >Rhodoferrax\_ferrireducens\_1 |WP\_011464516.1 methyl-accepting chemotaxis  
296 protein [Rhodoferrax ferrireducens]  
297 MKIFASMKIGKRLGFGFVAVLAFVAVLITGIGVWQLNALGNATREMTREPLAKERLISDWSRNINVAVIRTT  
298 AVAKSSDPSLVPPFFSTNAAEITKSTSAALLKQIEPLLSQEEKDLFSKVSDVRKAYLSSRDQVTKLKADGQA  
299 DEANRLLESTYIPAADNYMMLVSEFLGLQRKNLDAKAVEISGIETTSRNYLVALAALVLTFGVICAWLLTV  
300 GITGPLTNAVAVARRVADGDLATDIQTEGKDETAQLLQALSAMKDNLARIVGNVVRQSGEGVATASAEIAQG  
301 NNDLSARTEQQASALEETAASMEELSATVRQNADNARQANQLAQSASTVAIKGGEVVSQVVEITMKGINDSS  
302 KKISDIIGVIDGIAFQTNILALNAAVEAARAGEQGRGFVAVASEVRSLAGRSADA AKEIKGLINDSVQRVE  
303 QGSTLVQDQAGVTMTEVSSIRRVTDIMGEISAASTEQSQGVAQVSEAVTQMDQVTQQNAALVEEMAAAASS  
304 LKSQAQELVGTVSVFKLSQSQGAGLPDSSAPQRTSRVRSAPAPAPAPAARKLGNTPAKPAIRAKPDSLAAAP  
305 AAATPKAGGDDWESF  
306 >Rhodoferrax\_fermentans\_1 |WP\_078366276.1 HAMP domain-containing protein  
307 [Rhodoferrax fermentans]  
308 MNMVSSAKIGVRLALGFALVLAALVAVITAFSVVQLNRLAQASQDMMQEPLAKERYISDWSRNINVAVIRTT  
309 AVAKSSDASLVPPFFAANA AEITKSTSELLKKIEPLINSPEEKALFAKISEVRKLYLTSRDQVTKLKTGQV  
310 EEAYSILEKDYLPADGYMMLVGEFLAVQRKNLDTRAQEMADIERSRNL LALAVSALALGALCAWLLTV  
311 GITGPLKNSLAVATRVAEGDLSADIQVVGQDETAQLLQALSTMKNQLAGIVSHVRQGSQGVSVASAEIAQG  
312 NNNLSERTEQQASALEETAASMEELSATVRQNADNARQANQLAQSASTVAIQGGEVNVQVATMKGINDSS  
313 RKIADIIGVIDGIAFQTNILALNAAVEAARAGEQGRGFVAVASEVRSLAGRSADA AKEIKSLITDSVQRVE  
314 QGTALVDQAGVTMAEVVSSIRR VNDIMGEISAASTEQSQGVAQISEAVTHMDQATQQNAALVEEMAAAASS  
315 LKSQAQELVEVVS VFKLSANSQMG  
316 >Noviherbaspirillum\_massiliense\_1 |WP\_019143412.1 methyl-accepting  
317 chemotaxis protein [Noviherbaspirillum massiliense]  
318 MKISNLKIGTRLGFGFVAVLAFVAVLITGIGIWRNAVADATREMMQOPITKERLISDWGRNIFVAVVRTTA  
319 VAKSSDPALSPFFAKDAAASAKSSSDLIKQIEPLLSPEEKELFAKIMEIRKAYTAGRDGVMMLKADGQAE  
320 EANSMLKKNYLPVSAAYQDQVRDFLDMQRKSLDAMAKEIDSTATTSRKLLIALAALVTAFGAIFAWLLTTG  
321 ITAPLQKAVLAVRRVANGDLSRSVEVESSDETGQLLQALKDMNGSLARMVSTVRHGVDIAISTASSEIATGN  
322 QDLSRTEQQASSLEETASSMEELTSTVKQNADNARQANQLAVSASAVAGKGGQVVAQVVDTMASISDSSK  
323 KIVDIIGVIDGIAFQTNILALNAAVEAARAGEQGRGFVAVASEVRLAQRSA AAKEIKVLIDDSVGNVAA  
324 GSRLVNDAGTTMKDVVSVKRVTDIMGEILAASQEQSAGIEQVNQAISQMDQMTQQNAALVEEAAAAAAM  
325 QEQSVNLAQSVAVFKIGDGEPARSGIVPVTKPAARPATIPLRKVAAGKAVTPVTRRPVAAPSAGGDWEEF  
326 >Noviherbaspirillum\_humi\_1 |WP\_089401727.1 HAMP domain-containing  
327 protein [Noviherbaspirillum humi]  
328 MTILTKMKIGNRLALGFAIVLGLSILTTLIGILKLNVAADAERMLDEPIKKERLASDWSRNIDVAVNRRTT  
329 AIAKSSDASLASFFARKAEETTKSTSEIVKKIEPLLSREQEKQAFKAMEIRKTYLATRDQVIKQKDGRL  
330 EEANALLDKSYLPAAEAYQATVAEFVTAQRDYLDKLAADIAVIKQESRNRVILLALLCVAIGVASAWWLTR  
331 SITRPMRNALAVARRVADGDLTGRVEIESSDEVGQLQALQALKDMNNNLQRIVSDIRGGTDTIATASSQIASG

332 NLDLSSRTEQQASSLEETASSMEELTSTVKQSDNARQANQLALSASEVAGRGGAVVTQVVSTMASINESS  
333 RKIVDIIGVIDGIAFQTNILALNAAVEAARAGEQGRGFVAVVASEVRSLAQRSANAAKEIKTLISDSVEKVD  
334 DGARLVDQAGATMNEIVESVRRVSDIIGEITAASEEQRVGIEQINQAIVQMDQVTQQNASLVEQAAAAAEA  
335 MQDQASGLAQSVRVFKIDGMQSSAVALPAVRQAKSVPVAVGRPAPARTAPVLKPKPASGKRPAALPGHSSADG  
336 WEEF  
337 >Duganella\_1 |WP\_082507153.1 MULTISPECIES: HAMP domain-containing  
338 protein [Duganella]  
339 MNFLSNLSIGKRLAFGFVAVTLALSMVIAAIGVWRLQVAGATSHMMETPLAKERMISDWYSKIDS AIRRTT  
340 AIARSSDASLGAFFAEESKASTAASAELOKKIEPLISDADEKALWDRVMEQRKAYIASRDKVAKLKT DGEM  
341 EQANETFEEKTYRPAQAQYQALVQDLLSMQRGKIDTIGKEIDISISANSRSLTLVAVLAVAFVAVCAVYVLTG  
342 GITTPLSRAVDAAARRVAGDLTADIRVHGNDETGQLL GALRDMNQSLLNIVSEVRNGTHSITIASSEIAAG  
343 NQDLSARTEQQAASLEETASSMEELTSTVKQADNARQANQLAGAAASVARKGGSVSEVVTMESIDASS  
344 RKIVDIITVIDGIAFQTNILALNAAVEAARAGEQGRGFVAVVASEVRNLAQRSAAAAKEIKELIGDSVEKVN  
345 AGTRLVSDAGNTMEEIVSSVQRVSDIISEITAASAEQSSGIDEVYKAVGQMDQVTQQNAALVEEAAAAAES  
346 MQNQASNLADVVSFKVR  
347 >Pelomonas\_sp.\_KK5\_1 |WP\_077036671.1 HAMP domain-containing protein,  
348 partial [Pelomonas sp. KK5]  
349 MASSLTIGRKLTLGFGAVLACLALATVIGIVRLQDVAAHTREMMAQPLAKERMLSDWYRNVYSGIRRTSAI  
350 ARSSDASLVKFFAEDAAASTKSSQALAEKIDALITEPDEKRLFDELAQTRKRYVAARDAITKLKADGKDDE  
351 ALKQLDQAFVPAARDYERLMQALLDYQRKVIDSTAQEIDAIAARSRTMLIALAVVIGIGALVAWRISLGI  
352 TRPLAHAVTAARRVADGDLTGRFDDTRLGEDETGQLLALRDMNGSLERIVSEVREGTDTMSTASVEIATG  
353 TTDLSSRTEQQASALQQTAAATMEQLTGTVRQADNAAQASQLAASASEVASRGGTVVAQVVDTMGAISQAS  
354 RRVTDIISVIEGIAFQTNILALNAAVEAARAGEQGRGFVAVVAAEVRT  
355 >Massilia\_eurypsychrophila\_1 |WP\_099786613.1 HAMP domain-containing  
356 protein [Massilia eurypsychrophila]  
357 MNLLKKNMKVGTURLALGFVAVLAFSVLIAVVGVMQLNAIAHEAERMLAQPIQKERDAADWDRIYISIAVIRTS  
358 AIAKSSDVS LVPFFAANAALTTKGTAEVTKKLEPLLVTD AEEKKAYGDAMAVRKYTLASRDQVTRLKAEGKP  
359 EEAEDVLTKVYLPAAESYQALVARFLAVQRQNLDSMKGQIEESRDAAQTRVVVLAALSLLCGIAFAWWLTV  
360 GITAPVRRAVASARRVADGDLTEDIQVTSTDELGQLQALKDMNANLLKIVRDIRTGTDEMATASEIAAG  
361 NLDLSSRTEQQAASIEETASSMEELTSTVKQADNARQANQLAMQANVLTNEASSVATEGGAVVAQVVRTMADITSS  
362 KKIVDIIGVIDGIAFQTNILALNAAVEAARAGEQGRGFVAVVAAEVRTLAQRSASAAKEIKGLIDDSVDKVD  
363 TGSTLVQKAGATMGQIVSSVQRVTDIMAEITAASREQSAGIEEVNRAIAQMDQVTQQNAALVEESAAAAGS  
364 MHDQATGLARAVSAFKLGMEPVAAQTAPRAPVAARAAKPALAAPMRRPRLPAAGDEWEQF  
365 >Acidovorax\_sp.\_NA3\_1 |WP\_094097023.1 HAMP domain-containing protein  
366 [Acidovorax sp. NA3]  
367 MKNLKIGTRLGGGFALVVLVMMMTTIGLWRLQTV AQATHNMTQQPLAMERMISDWYRYVYSAVRRTSAIV  
368 KSTDPSLGAFFAEDAAMSTRESGKLQDQIEPLLSSPAEKELWVTIKKARVTYLSSRDQAVKAKADGQLEEA  
369 DRTLNQAF LPAAEKYMALIQQLLDLQRASIDTTAKDIQAVYAQSRMWLMLLCTLAVVAGGLCAWWLTRGII  
370 RPLSDAVRVARAVADNDLTTTVQVHSRDETGQLMQALQDMNTSLAQVVGVRVRSGETGIATASNQIDAGNQD  
371 LSSRTEQQASSLEETAASMEELTSTVKQADNARQANQLAASASQVAVQGGQVSNVVGTM SAINTSSRKI  
372 ADIIGVIDGIAFQTNILALNAAVEAARAGEQGRGFVAVVASEVRS LAQRSAAAAKDIKTLIDDSVGKVD EGT  
373 QQVAEAGKTMEAIIVDSVKRVTDIMAEIAAASQEQSAGIDQVHQAISQMDQVTQQNAALVEEAAAATGSLKA  
374 QAAQLSQAVSVFRIAGQPEARIAAPQRTAPRPVAAPTRTSPPPSTPCHRPAALQRPASKPRQPPLPRSAA  
375 RTTGNPSEPRARRVRAHAPPDKTPILIAACAYE  
376 >Herbaspirillum\_chlorophenolicum\_1 |WP\_050468456.1 methyl-accepting  
377 chemotaxis protein [Herbaspirillum chlorophenolicum]  
378 MSYFANMKIGKRLALGF AFILVAACVVAFS IWRLHGIAGATAAMMQPLTKERLVSDWYRTIHTSVRRTT  
379 AIAKSTDP SLAAFFAEDAAISTKLSTEQQAIEALLSSDAEKAVFDKLSAVRKDYIKYRDAISKAKADGQV  
380 DEVEKILSGPYNAAAKGYLDLLQQLLNVRAGIDQIAQDIQGIYEQSRNMLLALGALLFVLGWLFAWRLAV  
381 GITRPLERAVDVAETVAAGDLTMQVDAHLASRRDETGKLLHALQAMTGNLARIVGQVRS GDTAISTASREI  
382 ASGNLDLSARTERQAGSLEETASAMEELTSTVHQADNARQANQLAASASAVAQQGGEVVSQV VSTMGSIN  
383 ESSRKIVDIIGVIDGIAFQTNILALNAAVEAARAGEQGRGFVAVVASEVRS LAQRSAAAAKEIKGLIDDSVA  
384 KVG TGSQLVGQAGSTMDQVVASVRHVADIVGEITAASSEQSDGIGQVNLAITEMDQTTQQNAALVEQAAAA  
385 AEAMQEQAARLSEVVSQFKLGS AHEQQVANAAEPVLAAPRPSR NITPERAALGH  
386 >Noviherbaspirillum\_sp.\_Root189\_1 |WP\_057292684.1 methyl-accepting  
387 chemotaxis protein [Noviherbaspirillum sp. Root189]

388 MFANLKIGHRLALGFAGALAFSVVITGNSLWKMNEVSAQVQSMTESPLSKERYTADWSRNI STAVARTTAV  
389 AKSSDPSLSTFFAADTAATMKSTSEVLKLEVLSSDEEKTFLGKIVETRKS YTA YRDAVFKLKAEGKADE  
390 ANQVLEANYLPAAKNYQDLVAQFLNLQRGQLNEDAANIKETQIAARNQMIALSALVILFGIGCAWWLTVGI  
391 TGPLRNAVAARRVADGDLGSEIDVTSSDETQGLLHALRDMNANLRTTVTRVRQGTDTIATASNQIAAGNQ  
392 DLSARTEQQASSLEETASSMEELTSTVRQNADNARQANQLADAASQVAAKGGGEVIGEVVGTMGQINASARK  
393 IVDI IAVIDGIAFQTNILALNAAVEAARAGEQGRGFVAVASEVRTLAQRSASAAKEIKGLIEASVDQVDAG  
394 SMLVNQAGKTMADIVDSVRRVTDIMGEITAASQEQTSGIEQINQAITQMDVDTQQNASLVEEAAAASEAMQ  
395 QQAAELARVVSFKIDGENVPSSFVDVPAIIPRAGTAVAQKSTRTLKVRHASSVTSATPVPERRSFSKIRD  
396 NKDGDWEEF  
397 >Achromobacter\_1 |WP\_088595591.1 MULTISPECIES: HAMP domain-containing  
398 protein [Achromobacter]  
399 MLKNMRIGARLALGFIVLALAILITGISLWRLSTVAAATRAMELPLAKERMTNDWANYVLVIGITRTTAI  
400 AKSSDPTLAGFLASGATEGTRASLEIMKKLEPLIQDTDEKAVYQKIMDTRGGYVAARDAIMKFKGEGKADE  
401 ADKIFLSTFQPASVNYSKLLAEFVEVQRKRLDTHAAHIQEI DHDSRQQLIILAILATAFGALCAWVLRGI  
402 TQPLAKALTAARRVADGDLGSEITVHGRDETQGLLEALQAMNGNLRNIVGQVRGGTDSIATAAREIAAGNL  
403 DLSSRTEEQASSLSETAATMEQMTVTVKQNADNARQANQLAVSASEVASRGGAVVSQVVGTTMSSINESR  
404 IVDI IGVIDGIAFQTNILALNAAVEAARAGEQGRGFVAVASEVRS LAQRSATAAKDIKQLISDSVAKVDSG  
405 SQLVSQAGATMDEIVESVKRVTDIMGEISAATHEQTGSIEQINLAI AQMEQVTQQNAALVEEAAAASGAMQ  
406 DQTSTLAQLVSVFRLAQGSAEQAVARLQANAQAGTHEAGGYVALPA  
407 >Pelomonas\_1 |WP\_056270509.1 MULTISPECIES: methyl-accepting chemotaxis  
408 protein [Pelomonas]  
409 MTKLSIGKRLAAGFALVLAACVIAVAAWRLASTAAATRQMMDEPLAKERLISDWSRNINSGVRRRTMAIA  
410 KSSDASLVELFKEDAAQSTKSSGEMQEKLKGLIRSPDEQKLFDAVGEARKVYLLDSRDLTQLKKGDAEDA  
411 EKLLMEVFPVPGSKVYLARMQEFLDHQRKRIDQTAADIDAANGTGRMLLGLI GLAMLAVGIAAAWRITRSIT  
412 LPLAAANELAERVADGNLMRSGAGAVAGSDEIGQLQTTLRMRRETL SQAIGSIRDSAESIGTASAEIASGN  
413 QDLSARTEKAASSLEQTASAMEELTGTVHQSAAGQANSLAVSASVAQRGGDVVAQVVHTMDEINASSR  
414 KIADIIGVIDGIAFQTNILALNAAVEAARAGEQGRGFVAVASEVRS LAGRSADAKEIKGLIGSSVERVDA  
415 GSRLVAEAGKTMDELVGAVQRVKDIMGEITTATAEQSDGIAQVNI AIAQLDQVTQQNAALVEESTAAAESL  
416 REQATTLNAAVGTFFQVARR  
417 >Duganella\_zoogloeoides\_1 |WP\_019922517.1 HAMP domain-containing  
418 protein [Duganella zoogloeoides]  
419 MNMLANISIGKRLALGFTVILAFAMVITGIGVWRLQGVASATADMMQVPLAKERMIGDWSSNIDSAIKRTT  
420 AIARSTDASLATYFADEAKSSARSSEYQKKIEELITEPDEKELFARIGAQRKIYLSRDEL SKFKADGDL  
421 EQAQRVFDTVFVPGTAKYQALIADLLKMQRARIDATAAHIDGVADSSRNLLLVL AALMLAFGVLCAWLLTS  
422 GITGPLRAAVVAARRVASGDLTGHIIDDRGTDETSQLLGALKEMNASLLGIVAEVRS GTDHITTSSTEIAEG  
423 NQDLSRTEQQAGALEETASSMEELTSVVKHNADNARQANQLAASASQVAVKGGQVVSQVVD TMDSSINES  
424 RRIVDI IAVIDGIAFQTNILALNAAVEAARAGEQGRGFVAVASEVRNLAQRSASAAKEIKQLIGDSVDKVN  
425 QGSKLVADAGATMDDIVSSVARVSDIITEITAATTEQSAGINEV NQAIGSMDAVTQQNAALVEQAAAAAES  
426 MQQQAAVLAQAVAVFKVEGVAYQSRPGARPRKALQIT  
427 >Herbaspirillum\_1 |WP\_079214426.1 MULTISPECIES: HAMP domain-containing  
428 protein [Herbaspirillum]  
429 MNIIGNMKGKRLTLGFALILTF SIVIAGIGLWRLESVSAATREMMDEPLKTERLMADWYSNLAAGIRRTI  
430 AIAKSNDPALGPYFAEEAAASSKSSGEYQKKVEALLSSPEEKALFQKISDQRKVYLSRDEINKAKAAGNA  
431 EEATRILDKVFPASNAYQEAMRQLVELQRKEIDATAKEIDEIAAKSRTLIMVLEALILLGLVVCARYLTL  
432 GITRPLGTAVDISRVAEGDLSSDVQVKSDETQGLLQSLKDMNVSLRGIVSNVRNGTDTIT TASAIEAAG  
433 NLDLSSRTEEQASSLEETASAMEELISTVRQNADNARQASQLAVSASEVAEQGGGVVSQVVD TMGAINESS  
434 RKIVDI ISVIDGIAFQTNILALNAAVEAARAGEQGRGFVAVASEVRS LAQRSASAAKEIKELINDSVEKVG  
435 NGSRLVEQAGATMSEVVNSVRRVTDIVSEISAASAEQTTGIEQVNHAI TQMDQVTQQNAALVEEAAAAAAS  
436 MQNQADTLARLVSVFTLHAGDAPARREIDITPVSSQTLRAS  
437 >Duganella\_sp.\_HH101\_1 |WP\_070272075.1 HAMP domain-containing protein  
438 [Duganella sp. HH101]  
439 MTMLANISIGKRLALGFTIILAFAMLITGISVWRLQGVASATRDMMQVPLAKERMISDWSSKIDSAIRRTT  
440 AIARSSDQSLAAFFAEESKASSATS AEYQKKVEALIVDADEKELFGRIGEQRKIYLSRSDQVAKLKAAGEL  
441 DEAEKVFTNVFRPGSTSYQTLMQELLKMQRAKIDATAVHIDEVAASSRNLLYVLALLVLA FAVSSWLLTT  
442 GITGPLQQAVTAARRVAGGDLTGHIIDDSARDETQGLLSALKEMNASLLGIVTEVRS GTDHITTSSEIAAG  
443 NQDLSRTEQQAGALEETASSMEELTSTVKHNADNARQANQLAASAAQVAVKGGQVVSQVVD TMSINQSS  
444 RKIVDI IAVIDGIAFQTNILALNAAVEAARAGEQGRGFVAVASEVRNLAQRSASAAKEIKTLIGDSVEKVN

445 QGSKLVADAGLTMDEIVSSVHRVSDIITEITAASTEQSAGINEVYQAIIGAMDGVTQQNAALVEEAAAAAES  
446 MQQQAAALAQAVSVFKVDGSSSVSSRSRAKAAASVSPALRLTSRA  
447 >Pelomonas\_puraquae\_1 |WP\_088484898.1 HAMP domain-containing protein  
448 [Pelomonas\_puraquae]  
449 MIKLSIGKRLAAGFALVVLVLAGFVIALAVWRLDATAAATRQMMAEPLAKERLISDWSRNINAGVRRRTMAIA  
450 KSSDASLVELFKEDQAQSTKSSGEMQEKLKGLIRSPEEQALFDVAVGKARKVYIDSRDQIVKLLKDGQAEAA  
451 DKVFNDFVAPGAKVYLERMQEFLDHQRKEIDETAAGINSSNSSGRTVLLSLGVLILALGAGAAWHTTRSIT  
452 VPLAAANELAERVADGNLMRSGQGMAARADEIGQLQTTLRMRRETLAQTIGSIRDSAESIGTASSEIASGN  
453 HDLSGRTEKAASSLEETASAMEELTSTVQHSAAAAGQANQLAVSAASVAQRGGGEVVAQVVHTMDEINTSSR  
454 KIADIIGVIDGIAFQTNILALNAAVEAARAGEQGRGFVAVVAGEVRSLAGRSADAKEIKSLIGSSVERVEA  
455 GARLVAEAGKTMDELVGAVQRVKDIMGEITTATAEQSDGIAQVNIATAQLDQVTTQQNAALVEQSTAAAESL  
456 REQAIALNGVVGTFQVARR  
457 >Duganella\_sacchari\_1 |WP\_072787488.1 HAMP domain-containing protein  
458 [Duganella\_sacchari]  
459 MNMLANISIGKRLALGFTIILAFAMLITGISVWRLQGVASATSEMMQVPLAKERMISDWSGKIDSGIRRTT  
460 AIARSSDPSLGAYFAEESKVSSAGSSELQKKIEALISDADEKELFGRIGEQRKVYLSRRDQIAKLKTSSEL  
461 DEANKIFETVFRPGTAKYQELIAELLKMQRAKIDAAAQHIEDVASSSRNLLYVLATLVLAFGVTSAWLLTT  
462 GITRPLQEAUVVARRVASGDLTAHIDDSARDETGQLLSALKEMNASLLGIVTEVRQGTGHEHITISSTEIAQG  
463 NQDLRRTEQQAGALEETASSMEELTSTVKHNADNARQANQLATSAAQVAVKGGEVVAQVVGTMD SINQSS  
464 SKIVDIIAVIDGIAFQTNILALNAAVEAARAGEQGRGFVAVVATEVRNLAQRSAGAAKEIKALIGDSVEKVN  
465 LGSKLVADAGTTMDEIVASVHKVSDMISEITAASSEQSAGINEVNQAIIGSMDAVTQQNAALVEQAAAAAES  
466 MQQQAAALAQAVSVFKVEDTLRLSHREALAKPAVAQRKQLQITRS  
467 >Cupriavidus\_1 |WP\_017511610.1 MULTISPECIES: methyl-accepting  
468 chemotaxis protein [Cupriavidus]  
469 MKNLGIGVRLGIGFGVLLLLSTFMTVLGVLRLLEDVAGRTHAMMQPLAKERIVSDWYRLMYASVRRTTAIT  
470 RSSDPSLGQFFAAETKTSAETIAAMRDKIKPMLTSDAEKASFERILVVRNPNYNSRDKIAKLKQDGQAEDA  
471 VKVLENEFVPAGDAYLAEIQKLLDIQRTSIDATAEEINRIYESARNGLIALGVIALAIGVAFAWWLTIGIT  
472 RPLHRAVGFARTVAAGDLTGRIDVDSRDETGQLLALREMNIENILGIVKEVRKGTGTEAIATGTSQIAAGNTD  
473 LSQRTEQQASSLQETASSMEELTSIVRQNASAKQASGLAVNASDVATQGGEVVGVVHTMDEINAASRKV  
474 VEIISVIEGIAFQTNILALNAAVEAARAGEQGRGFVAVVAGEVRSLAQRSATAAKEIKALIGDSADRVERGS  
475 QLVAQAGQTMEEIVSAVKRVTDIMGEISAASVEQSAGIEQVNQAVTQMDTQVTTQQNAALVEQAAAAAGSLEE  
476 QAQRLKEAVATFRLAA  
477 >Massilia\_sp.\_9096\_1 |WP\_036173002.1 methyl-accepting chemotaxis  
478 protein [Massilia\_sp. 9096]  
479 MKNLNIGARLSLGFGLVLAFTLLMTAIGIFQMRVADATRDMMTVPLTKERLVSDWYRRIHTSVTRTTAIA  
480 RSADPSLGAFFAEQTAVSTREVTTELQKKVEPLLDTPQEKQALARIAAARKPYLALRDAMTALKKDGKAEAA  
481 QQMLVQQFQAGAEYLASLSDFLDLQREAINRRTGEVDALYQHNRSVLLGMGLAVLAFGAACAWWLTTRGIV  
482 VPLNRAVEIAVSVANNDLRSDIEVSSRDETGRLLGALKTMNAGLARIVGQVRSQTTQIATASSEIIVGNLD  
483 LSSRTEQQASALEETAASMEELTSTVKQADNARQANQLALSASAVAVRGGEVVGVVDTMEAINAASRKI  
484 VDIIAVIDGIAFQTNILALNAAVEAARAGEQGRGFVAVVAGEVRTLAQRSASAAKEIKALIGDSVKGIDAGS  
485 QLVQSAGTTMAEVVTSIQRVTDIMGEITSASAEQSSGIEQVNRAIADMDGVTQQNAALVEQASAAAAAMQD  
486 QARALEATVSLFKLAGSAQAEPVARLAA  
487 >Bordetella\_sp.\_N\_1 |WP\_057651873.1 methyl-accepting chemotaxis protein  
488 [Bordetella\_sp. N]  
489 MLKMNKIGARLALGFGLVLAFLALAMLITGMSLWRLSTVANATRAMELPLAKERMTNDWANYVLVGITRRTTAI  
490 AKSTDTSLAPFFAGDAAEGTRASLEIMKKLEPLIQDTDEKAVYKIMDVRGGYVNARDYIMKLGEGKAE  
491 ANKIFLSTFPASVGYSKLLAEFVDVQRKRLDLDAAHIQEIQESRQQLIILALLALAFGATCAWLLTRGI  
492 TRPLASALDAARRVADGDLSSSEIKVHGRDETGQLLEALQGMNGNLRNIVGQVRGGTDSIATAAREIAAGNL  
493 DLSSRTEEQASSLSETAATMEQMTVTVKQADNARQANQLAMSASEVASRGGAVVSQVVGTTMSSINSSRR  
494 IVDIIGVIDGIAFQTNILALNAAVEAARAGEQGRGFVAVVASEVRSLAQRSATAAKDIKQLISDSVAKVDSG  
495 SQLVQAGATMDEIVESVKRVTDIMGEISAATHEQTGSIEQINLAIQMEQVTQQNAALVEEAAAAASGAMQ  
496 DQTSTLAQLVSVFRLAQGTAEYAVARLTAAKHESGEYVALPA  
497 >Bordetella\_genomosp.\_10\_1 |WP\_094853882.1 HAMP domain-containing  
498 protein [Bordetella\_genomosp. 10]  
499 MLKMNKIGARLALGFGLVLAFLALIAAIGLWRLSGVADATRAMELPLAKERMTNDWANFVLVGITRRTSAI  
500 AKSTDPSSLSSFFARDASEGTRISLEIMKKLEPLIQAEDEKAVYQKIMEVVRVGYVNARDAIMKLGEGKAE  
501 ASQIFQSTFLPASVGYSKLLAEFVGVQRKRLDQDAHIQQIAGESRHQLIVLAILVLAFGAVCAWLLTRGI

502 TRPLASAVDAARRVAEGDLSSEIVIHGRDETGQLLLALQAMNGNLRDIVGQVRGGTDSIATAAREIAAGNL  
503 DLSSRTEEQASSLSETAATMEQMTVTVKQNADNARQANQLAMSASEVASRGGAVVSQVVGTTMSSINESR  
504 IVDIIGVIDGIAFQTNILALNAAVEAARAGEQGRGFVAVSEVRSQAQRSAATAAKDIKQLISDSVVKVDSG  
505 SQLVVSQAGATMDEIVESVKRVTDIMGEISAATHEQTGSIEQINLAIQAQMEQVTQQNAALVEEAAAASGAMQ  
506 DQTATLAQLVSVFRITQDAAAKRVPRLAGAVQEIEEFAAMPA  
507 >Massilia\_sp.\_Root351\_1 |WP\_057154754.1 methyl-accepting chemotaxis  
508 protein [Massilia sp. Root351]  
509 MSMLSNIIRIGKRLALGFVILALSVAITGISIWRLHEVANATRAMMEVPLAKERMISDWSSKIDS AIRRTT  
510 AIARSSDPSLVGFFFADEAKKSSAVSAELQKKIEALVDEDEKELFNRIQEQRKIYLSRDKVTKLKAEGALE  
511 EAEAHFSNVFAPGAAAYQNLMAELLRQGRKIDAI AVEIENGADTSRKL LIALTALV LALGVVCSWLLTAS  
512 ITRPLGQALDAARRVAAGDLTGTIRVSGSDETGQLLALQDMNALLNIVMQVRSQTAEIETSSTEIAAGN  
513 QDLSSRTEQQASSLEETAASMEELTATVKNNASNAHQANQLADAAADVAVKGGAVVAEVVGTMEAINAASR  
514 KIVDIISVIDGIAFQTNILALNAAVEAARAGEQGRGFVAVSEVRTLAQRSAAAAKEIKELIGDSVDKVNQ  
515 GGKLVADAGATMEDIVSSVHRVSTIITEITTASKEQSAGIDEVYKAIGEMDQVTQQNAALVEQAAAAESM  
516 QHQAMQLAEVSVFQVGGAAKPPAGRAPAARTQGGKALALR  
517 >Pelomonas\_sp.\_Root1217\_1 |WP\_057299221.1 methyl-accepting chemotaxis  
518 protein [Pelomonas sp. Root1217]  
519 MNKLSIGKRLAAGFALV LALAACVIALASWRLASTAAATRQMMDEPLTKERLIADWNRNINSGVRR TMAIA  
520 KSSDASLVLFKEDQAQSTKSSSEM QDKLALIRSPEEQVLFDEVGKARKIYIDSRDTIVKLLKDGQAEAA  
521 DKLLMDVFPVPGSKVYLAKMQDFLDYQRKAIDQTAAGIDTANSNGRL LLLGFGIAMLGLGVAAAWTITRSIT  
522 LPLAAANELAERVADGNLMRSGAGQIASSDEIGQLQTTLRMRRET LAQTIGSIRDSAESIGTASAEIASGN  
523 QDLSARTEKAASSLEQTASAMEELTGTVQQSAASAGQANSLAVSAANVAQRGGEVVGVVHTMDEINASSR  
524 KIADIISVIDGIAFQTNILALNAAVEAARAGEQGRGFVAVSEVRSLAGRSADAAKEIKSLIGSSVERVEA  
525 GSRLVAEAGKTMGELVAVQVRVKDIMGEITTATAEQSDGIAQVNSAIAQLDQVTQQNAALVEESTAAESL  
526 REQATTLNGAVGTFQVARR  
527 >Cupriavidus\_pinatubonensis\_1 |WP\_011299856.1 methyl-accepting  
528 chemotaxis protein [Cupriavidus pinatubonensis]  
529 MKNFVGIGVRLGIGFGVVLVLCALMSAFGIMRLQQAERTHDMMQPLTKERLVSDWYRLMHTSVRRTTAVA  
530 KSADPSLGAFFAKETKASLEGIAALRDKMQPMLTSEA EKAFAKILQVRE PYNASRDKITKLLKQEGLT EEA  
531 NAVLEKEFPAGDAYLAEIQKLLDIQRSSIDATAAEINTIYVNARNSLILLGVLVLAIGVGFVAVLTRGII  
532 RPLGHAVDIARTVASGDLTSDIRVDSQDETGQLLHALSEMNTNIIHIVRDVRTGT EAIASGTSQIAVGN TD  
533 LSQRTEEQASSLQQTAA SMEELTSIVRQ NADNAKQASALAVNASEIAAKGGDVADKVAETMEEINGASKKV  
534 VDIIAVIEGIAFQTNILALNAAVEAARAGEQGRGFVAVGAGEVRSQAQRSAATAAKEIKALIGDSVDRVEKGS  
535 TLVAQSGQTMLEIVEAVRRVTDIMGEISAASAEQSAGIEQVNQAVTQMDSVTQQNAALVEEAAAAGSLEE  
536 QAQRLKQAVATFRIAA  
537 >Noviherbaspirillum\_denitrificans\_1 |WP\_088710251.1 HAMP domain-  
538 containing protein [Noviherbaspirillum denitrificans]  
539 MNLSNLKIGHRLGIGFVILAFTVLI AAVSIWRLKAI SDATSQMMAH PHAKERMVSDWYRYIAAGVRR TTA  
540 IAKSADPSLQGFFAEDAAATSKGASELQKAVEPLLTGEREKDIYTRIGEKRKAYAAARDAIVKARADGKVD  
541 EVERLLQSEFI PAANAYQALVQDLLDEQRHMDGTAEVYATYRQGAWVMTALTLFGLGTGCVFAWWLTKG  
542 ITRPLKQAVGVARVAEGDLSTEIRSSANDETGELLLLALRDMNISLARIVTDVRASTVTIATASSEIASGN  
543 QDLSARTEQQASSLEETAASMEELTSTVRQ NADNAQASDLAVSASDLAKKGGDVVGQVVDTMGSIRDSSR  
544 KIVDIISVIDGIAFQTNILALNAAVEAARAGEQGRGFVAVGAGEVRSQAQRSAATAAKEIKELINDSVDKVDT  
545 GSALVNAAGETMEAI VESVRGVASLMGEIASASNEQSTGIGHVHEAIAQMEQVTQQNAALVEQAA SAAANM  
546 HAQADHLTA AVRVFRLEHAAQPV AHHA PLRVVATTPAPLPSRAKRALRVANARSEEGWEEF  
547 >Cupriavidus\_pauculus\_1 |WP\_061953805.1 methyl-accepting chemotaxis  
548 protein [Cupriavidus pauculus]  
549 MKNLIGVRLGIGFGVLLSTLMTVLGVARLQEVAGRTHAMMQEPLAKERLVSDWYRLMYASVRR TTA  
550 RSSDPSLGAFFAAETAYSVKAI AELRDKIEPRLSTDEEKA AFKKIQTVRNPYND SRDKITKLLKAEGMTDEA  
551 NKVLETEFVPAGDAYLAEIQKLLDIQRSSIDATAEQINGIYVSARNGLITLGVIALGIGVAFAWWLTIGIT  
552 RPLHRAVG FARTVAAGDLTSRIEVD SRDETGQLLDALREMNENILGIVQEVRTGTDAIATGTSQIAAGNTD  
553 LSQRTEEQASSLQETASSMEELTSIVRQ NADSAKQASSLAENASEVAIQGGEVVGVVHTMDEINTSSRKV  
554 VDII SVIEGIAFQTNILALNAAVEAARAGEQGRGFVAVGAGEVRSQAQRSAATAAKEIKALIGDSADRVERGS  
555 QLVAQAGQTM EQIVSAVKRVTDIMGEISAASAEQSAGIEQVNQAVTQMDT VTTQQNAALVEQAAAAAGSLEE  
556 QAQRLKEAVATFR LAA  
557 >Cupriavidus\_sp.\_YR651\_1 |WP\_092142725.1 HAMP domain-containing protein  
558 [Cupriavidus sp. YR651]



559 MKNLGIGVRLGIGFGVLLLLCTLMTVLGVLRLQEVAGRTHEMMQQPLAKERLVSDWYRLMYASVRRTTAVA  
560 RSSDPTLGKFFAAETKTSADTIATLRDKIQPMLTSDAEKAAFQKILTVRNPNYNSRDKITKQDGLTDDA  
561 NKVLEAEFVPAGDAYLGEIQKLLDIQRESIDSTAEENRIYQRTARNGLIALGIVALAIGVAFAWWLTIGIT  
562 RPLHRAVGFARTVAAGDLTSRIDSSTDETGQLLDALREMNDNILGIVREVRNGTESIATGTSQIAAGNTD  
563 LSQRTEEQASSLQETASSMEELTSIVRQNADSARQASSLAVNASEVATQGGGEVVGQVVHTMEEINVSSRKV  
564 VDIIAVIEGIAFQTNILALNAAVEAARAGEQGRGFVAVAGEVRSQAQRSAATAKEIKSLIGDSAERVEKGS  
565 QLVSQAGLTMEQIVSAVKRVTDIMGEISAASAEQSAGIEQVNLAVTQMDTVTQQNAALVEQAAAAAGSLEE  
566 QAQRLKEAVSTFRLAA  
567 >Herbaspirillum\_autotrophicum\_1 |WP\_050464173.1 methyl-accepting  
568 chemotaxis protein [Herbaspirillum autotrophicum]  
569 MSMLGNIKIGKRLGIGFFLILLFAIAITAIGIWRDLDMVATSTRTMMAQPLAKERYIGDWYRNIVSGVRRTL  
570 AIAKSSDDSLGAFFADDVKISTQTSSVLQKQIEALIDGDAEKTFLGKLGEEKTYIAARDNVIKLKNEGKT  
571 EEAADALNKVFI PSADRYQKVIQELLDMQRKTIDQMAQEIDDVARHSMKMLMTGLAAMMLALGVLCAWLLTT  
572 SITTPLAAAVRLSRRIADGDLTEQSPVRSRDELGQLNQALNDMSNSLLNIVAQVRQGADTIATASSQIASG  
573 NLDLSSRTEEQAGSLEETASAMEELTSTVKQNADNARQANQLAASASSVAVQGGQVVSQVVDTMEAINSSS  
574 KKIVDIIISVIDGIAFQTNILALNAAVEAARAGEQGRGFVAVASEVRSQAQRSAATAKEIKGLIDDSVEKVG  
575 TGSKLVGQAGVTMDEVVSSVKRVTDVMGEITAASQEQSTGIEEVNRAITQMDETTQNAALVEQAAAAAQ  
576 LQDQAGNLVHVVSFKIDGQHRVAQAAPATVHNVPKKNITPAATRLTPPTRTAIAKPATRNSSGAPKATP  
577 KALDRPAPSQRDDADEWEQF  
578 >Janthinobacterium\_sp.\_BJB412\_1 |WP\_099419251.1 HAMP domain-containing  
579 protein [Janthinobacterium sp. BJB412]  
580 MNAFKNMSIGTRLGLGFLILALAMLITGISVWRLQNLSEATRAMMEVPLAKERMISDWYSKIDS AIRRTT  
581 AIARSSDQSLVAYFADEAKASSAVSAEYQKKVEALVVDPEKELFGRIGEQRKIYLSRSDQVAKFKAAGQF  
582 EEADAVFLKVFAPGSTAYLGLMQELLKMRGKIDATAQRIEAVAAQSRLLLLVLAALVLAFLGALCSWLLTT  
583 GITRPLATAVQAARRVAEGDLTGHEIVRSRDETGQLLQALQHMNASLLTIVSQVRSRTEHIASSSTQIAAG  
584 NLDLSSRTEEQAGSLEETASAMEELTSTVKHNADNARQANQLAASAAQVAVKGGAVVAQVVGTMESINSAS  
585 KKIVDIIAVIDGIAFQTNILALNAAVEAARAGEQGRGFVAVASEVRSQAQRSAATAKEIKALIGDSVEQVN  
586 QGGRLVADAGATMQEIVASVHRVSDIITEITAASQEQSAGIDEVYRAIGQMDSVTQNAALVEQAAAAEA  
587 MQQQAANLAEVVSFKVEGGARPRALSGHNGPARAAERAAPPRLARRA  
588 >Ralstonia\_pickettii\_1 |WP\_096746106.1 HAMP domain-containing protein  
589 [Ralstonia pickettii]  
590 MQFISNMRIKRLALGFAVVLAFSIVITAIWIWRLDSASTATREMMNEPLLKERLMGDWYANLAAGIRRTI  
591 AVAKSSDPALGPYFAAEVAASSKSSGEYQKKVEALLSSDEEKLFQIGELRKVYLSARDSINKAKAGGDA  
592 EEAQRILDQVFPANAYQDTMRQLVEVQRRTIDAAAKKIDADSARSRTLLMVLEGLILTMGIAFAYFLTL  
593 SITRPLHAAVGIASRVAEGDLSTVVAQSTDETGRLLQALADMTAQLVGTVGSIRVASESVAGAAGQIAAG  
594 NMDLSTRTEEQAGSIEQTAASSTTELTEAVKRNADNAREATS LAASARGMTETGRAEVAAMVRTVEEVNAAS  
595 KKIAEITGMIEGIAFQTNILALNAAVEAARAGEQGRGFVAVAGEVRSQAQRSAATAKEIKELIEASTGKVQ  
596 LSAEQAGVNAAMTRVSTAIEGVSSIIAEIIVASDEQSRNLAQVSAISQIDQVTQNAALVEESAAAAQA  
597 MQEQSGNLRRAVSVFRLGAGQG  
598 >Janthinobacterium\_sp.\_13\_1 |WP\_099664349.1 HAMP domain-containing  
599 protein [Janthinobacterium sp. 13]  
600 MNLLRNVSIGVRLGLGFAVILLFMSMLITGISVWRLHVDVAMATRTMMELPLAKERYISDWYAKIDSGVRRTT  
601 AIARSSDTSLGAYFAEEAKQSSVVSSELQKKIEALISSPEEKELFRLVSEQRKVYLDRAQVSKLKADGQE  
602 AEAFAKQFQIFVPGSTKYLKVVNDMLQHQRASIDTTAREIDEVAKTSRNLTLAVLALGFGVVCWLLTT  
603 GIVRPLRTAVDIARKVADGDLTAQIDASAKDETGQLLLALKDMNTSLNIVSEVRSRGTDSIATSSTQIAAG  
604 NQDLSSRTEEQAGSLEETASAMEELTSTVKQNADNARQANQLAASAAQVAVKGGAVVAQVVGTMESINASS  
605 NKIVDIIISVIDGIAFQTNILALNAAVEAARAGEQGRGFVAVASEVRSQAQRSAATAKEIKTLIGASVEQVN  
606 AGSMLVAQAGSTMNDIVDSVQRVSDIITEITAASSEQSVGIDEINRAIGQMDAVTQNAALVEESAAAAES  
607 MQHQAHNLAQVVSFKLNGQQAGAGGLKAVGGGKRPAAKAPQEALQIGRAA  
608 >Janthinobacterium\_sp.\_1\_2014MBL\_MicDiv\_1 |WP\_071324045.1 HAMP domain-  
609 containing protein [Janthinobacterium sp. 1\_2014MBL\_MicDiv]  
610 MNVLRNVSIGVRLGLGFAVILLFMSMLITGISVWRLHVDVATATRTMMEQPLAKERYISDWYGRIDS AVRRTI  
611 AIARSSDTSLSGYFAEESKVSSASSAELQKKIEALIDKPEEKAMFAGLLEQRKVYIGSRDQVYKLGESQV  
612 EAANDVFEXTFVPAAAKYQKMLDLLEHQRASIDATARDIDEVAKTSRNLTLAVLALGFGVVCWLLTM  
613 GIVRPLRTAVDVARKVADGDLTAQIDASAKDETGQLLLALKDMNTSLTIVSEVRSRGTDSIATSSTQIAAG  
614 NQDLSSRTEEQAGSLEETASAMEELTSTVKQNADNARQANQLAASAAQVAVKGGEVVAQVVGTMESINASS  
615 NKIVDIIISVIDGIAFQTNILALNAAVEAARAGEQGRGFVAVASEVRSQAQRSAATAKEIKTLIGASVEQVN

616 AGSMLVAQAGSTMNDIVDSVQRVSDIITEITAASSEQSVGIDEINRAIGQMDAVTQQNAALVEESAAAAES  
617 MQHQAHNLAQVVSFVFKLNGQQAMAGGLQGARRPASPPALRLG  
618 >Acidovorax\_avenae\_1 |WP\_053843877.1 HAMP domain-containing protein  
619 [Acidovorax avenae]  
620 MRNLPIGARLGAGFAMVLGLMALMTVFGLWRLQSV AQATHDMTQQPLANERMISDWYRYVDSAARRTTAIV  
621 KSTDPSLAFAFFADDSAMTTREARLVEQIEPQLDSPAEKAVWADIGRARATYLASRDQAVKAKAAGQAEAA  
622 DRLLTQVYLPATKEYVALIQKLLDLQRADIDATAAHIQDIHAQSRLLLAVLGLLALALGAACAVWLTRGIV  
623 RPLSEAVRVARAVAASDLTSHVTVASSDETGQLLQALKDMNESLAQVVGRVRSRGTDSIATASSEIDTGNQD  
624 LSSRTEEQASSLQQTAAAMEELTSTVRQNADNARQASQLASSAAGTAARGGQVVANVVNTMGAIHESSRRI  
625 ADIIGVIDGIAFQTNILALNAAVEAARAGEQGRGFVAVGEVRLASRSAAAADIKTLIGDSVSRVDEGS  
626 SQVAEAGRTMDEIVQNVQRVNDLVAEISAASEEQSRGIDQVHQAVSQMDQVTQQNAALVEEAAAATGSLKA  
627 QAAQLSQAVSVFRI PAGMQAAAAAPASAVAPSTRHAPGLAPVRAISGAVRASAHVAPRPVPARTPAAPQAL  
628 PRAAAPATPTAPKASRGSDDDDWETF  
629 >Rugamonas\_rubra\_1 |WP\_093391227.1 HAMP domain-containing protein  
630 [Rugamonas rubra]  
631 MNTFKNMSIGTRLGLGFLILALAMLITGISVWRLQNLSDATRAMMEVPLAKERMISDWYSKIDSAIRRTT  
632 AIARSSDQSLVAYFADEAKASSAVSAEYQKKVEALVVDPEKELFGRIGEQRKIYLSRRDQVAKFKAAGQL  
633 EEADAVFLKVFAPGSTAYLGLMQELLKMRGKIDATAQRIEAVAAQSRLLLLVLAALVLAFLGALCSWLLTT  
634 GITRPLATAVQAARRVAEGDLTGHIIEVRSRDETGQLLQALQHMNASLLSIVSQVRSRGTGTEHIASSSTQIAAG  
635 NLDLSQRTEEQASLEETASSMEELTSTVKHNADNARQANQLAASAAQVAVKGGAVVAQVVGTMESINSAS  
636 KKIVDIIAVIDGIAFQTNILALNAAVEAARAGEQGRGFVAVASEVRNLAQRSASAAKEIKALIGDSVEQVN  
637 QGGRLVADAGATMQEIVASVHRVSDIITEITAASTEQSAGIDEVYRAIGQMDSVTQQNAALVEQSAAAAEA  
638 MQQQAANLAEVVSFVKEGGARPAQLSGHNGPARAAERAAPPRLARRA  
639 >Herbaspirillum\_sp.\_HZ10\_1 |WP\_088752409.1 HAMP domain-containing  
640 protein [Herbaspirillum sp. HZ10]  
641 MNYFANMKIGRRALGFAFILVAASVVVALSIWRLHGIAAATESMMEKPLLKERLVSDWYRTIHTSVRRTT  
642 AIAKSSDPSLAFFAEDAATATRQSTEQQKAIEALLSSDKEKDVFTRLAAVRKDYIKYRDAISKAKAEGQT  
643 EEAAILAGPYDVAAKGYLDLLQQLLNVRAGIDGIAQDIQSIYEQSRNMLLALAVLLVASGCLFAWRLAL  
644 GITRPLERAVNAAESVAAGDLTTRIDADLAARRDETGKLLHALQAMTDNLARIVGQVRSRGTDAIATASREI  
645 AGNLDLSARTERQAGSLEETASAMEELTSTVHQADNARQANQLAASASSVAQGGVVSQVVTMGMSIN  
646 ESSRKIVDIIISVIDGIAFQTNILALNAAVEAARAGEQGRGFVAVASEVRSLAQRSASAAKEIKGLIDDSVA  
647 KVGSGSELVGRAGSTMGEVVASVRHVADIVGEITAASREQSDGISQVNLAITEMDQTTQQNAALVEQAAAA  
648 AEAMQEQAARLSEVVSQFKLAAQEAQAYAVPLGRPAVDITPELPAQR  
649 >Massilia\_1 |WP\_047823722.1 MULTISPECIES: methyl-accepting chemotaxis  
650 protein [Massilia]  
651 MGLVANIKIGKRLGLGFALILAMTVAISAVGAWRMNKIADKTKAMMAVPLAKERLITDWYTLNFASIRRTA  
652 AIAKSSDPSLGAYFKEDSAASVKKAAELLKQIEPLIAASGPEKELFAKILEQRKVYSASRDGTVKAKADGN  
653 AEEAARILDKEFTPAQKYQDLLQDLVNMQRSTSMNDTAGAIDVNADSSSTNLIMILCACAVALGSVISWMLT  
654 RGIVQPIREAVAVAETVAGGDLTHNIEVRSRDETGALLRALRHMNDSLGVIVSQVRRGDTDIATASREISA  
655 GNLDLSSRTEEQAGALEETAASMEELTTTVRQNADNARQANQLAIAASAVATQGGAVVGEVITTMGAINDS  
656 SQRIADIIGVIDGIAFQTNILALNAAVEAARAGEQGRGFVAVASEVRNLAQRSASAAAKEIKELITASVANV  
657 DAGTKLVDRAGATMEEVVSIRRVTDIMAEITSASQEQTGGIEQVNSAITQMDHVTQQNAALVEEAAAAT  
658 SMQDQAAKLADVVSFVKLDRAHDLGAVAAPVQAKAAPVRPALPRAAKPVVKVAAAKTVKRNEPVAAGDWE  
659 F  
660 >Janthinobacterium\_sp.\_AD80\_2 |WP\_102293871.1 hypothetical protein  
661 [Janthinobacterium sp. AD80]  
662 MNLLRNVSIGVRLGLGFVILLFSMVIITGISVWRLHVDVATATRTMMEQPLAKERYISDWYGRIDSAVRRTI  
663 AIARSSDTSLSGYFAEESKVSSASSAELQKKIEALIDLPEKAMFAGLLEQRKVYISSRDQVYKLGESQV  
664 EAANDVFEKTFVPAAAKYQKMQDQDLLEHQRASIDTTAREIDAVANTSRNLLLVLAVLALAFGVVCAWVLT  
665 GIVRPLRTAVEIARKVADGDLTAQIDASAKDETGQLLLALKDMNTSLLNIVSEVRSRGTDSIATSSTQIAAG  
666 NQDLSSRTEEQAGSLEETASSMEELTSTVKQNADNARQANQLAASAAQVAVKGGDVVAQVVGTMESINASS  
667 NKIVDIIISVIDGIAFQTNILALNAAVEAARAGEQGRGFVAVASEVRNLAQRSASAAKEIKTLIGASVEQVN  
668 AGSMLVAQAGSTMNDIVDSVQRVSDIITEITAASSEQSVGIDEINRAIGQMDAVTQQNAALVEESAAAAES  
669 MQHQAHSLAQVVSFVFKLNGQQAGATGLKGAHAAQRQAGQAPATALRLRAR  
670 >Cupriavidus\_gilardii\_1 |WP\_053823517.1 methyl-accepting chemotaxis  
671 protein [Cupriavidus gilardii]

672 MKNLGIGARLGIGFGVLLSTLMTGLGILRLQOVAERTHDMMQOPLAKERLVSDWYRYMHTSVRRTTAVA  
673 KSSDPTLGAFFANETKHSVKAIADLRDKIEPLLSTDAEKQAFQTILRVREPYNASRDKITKLKQEGLTDEA  
674 NTVLEKEFVPAGDAYLGEIQKLLDIQRASIDATARDINAVYQTARNRLIGLGVLVLAIGIAFAVWLTRGIT  
675 RPLHRAVHIARTVAAGDLSARIDVDSKDETGQLLQALAEMNGNLLRIVNEVRLGTEAIATGTSQISVGNTD  
676 LSQRTEEQAASLQETASSMEQLTSIVRQNADNAKQASRLAVDASDIAVKGGTVVGQVVDTMDEIHGASKKV  
677 TDIIAVIESIAFQTNILALNAAVEAARAGEQGRGFVAVAGEVRSQAQRSAATAAKEIKSLIDDSAERVEKGS  
678 QLVSEAGQTMEEIVGAVKRVTDIMGEISAASAEQSAGIEQVNQAVTQMDTVTQQNAALVEQAAAAAGSLEE  
679 QAQRLKQAVSTFRLGTAQLAA  
680 >Herbaspirillum\_lusitanum\_1 |WP\_016833338.1 methyl-accepting chemotaxis  
681 protein [Herbaspirillum lusitanum]  
682 MNIIGNMIRKRLALGFVILAFSIVITAIIGIWRLQTVSSATREMMSQPLLKERLIGDWYANLASGIRRTI  
683 AIAKSSDPALGPYFAEEAAASSKGSGEYQKKVEALLESEDEKLFQKIGEQRKLYLSSRDAINKAKAAGNI  
684 EEAERVLEKDFVPASNAYQDTMRQLVELQRKIDIDETAKHIDIIEAEDSRILLLEGLILVLGVLCAWYLTIV  
685 GITRPIINSAVTISRVAEGDLTSDVQVGSKDETGQLLQALQDMNISLRGIVSNVRTGTDTIATASSEIAAG  
686 NLDLSSRTEQQASALEETASSMEELISTVKQNADNARQANQLAVSASEIATQGGGVVGVVDVTMGAINSS  
687 RKIVDIIISVIDGIAFQTNILALNAAVEAARAGEQGRGFVAVASEVRSQAQRSAATAAKEIKVLINDSVEKVG  
688 NGSKLVEQAGATMAEVVNSVRRVTDIVAEISSASEEQTTGIEQINHAITQMDQVTQQNAALVEEAAAAAAS  
689 MQSQADSLAQLVSVFTLSGTPALPAARRTIDITPSEPLR  
690 >Janthinobacterium\_sp.\_GW456P\_1 |WP\_086153639.1 HAMP domain-containing  
691 protein [Janthinobacterium sp. GW456P]  
692 MNLLRNVSIGVRLGLGFVILLFSLMIGISVWRLHVDVATATRTMMELPLAKERYISDWYAKIDSGVRRTT  
693 AIARSSDTTLGAYFAEEAKQSSVVSSELQKKIEALISSPEEKELFRLVSEQRKVYLDRAQVSKLKADGQE  
694 AEAFAFGQIFVPGSTKYLKVVNDMLQHQQRASIDTTAREIDDVAKTSRNLTLAVLALGFGVVCALLTT  
695 GIVRPLRTAVDIARKVADGDLTAQIDASAKDETGQLLQALQDMNTSLLNIVSEVRTGTDSIATSSIEIAAG  
696 NQDLSSRTEEQAGSLEETASSMEELTSTVKQNADNARQANQLAASAAQVAVKGGEVVAQVVGTMESINXAV  
697 KGGEVVAQVVGTMESINASSNKIVDIIISVIDGIAFQTNILALNAAVEAARAGEQGRGFVAVASEVRNLAQR  
698 SASAAKEIKTLIGASVEQVNAQSMQHQAHNLAQVVSFVFLNGQQASVTGLKGGNGSKRPAKAPQALRIGRAA  
699 >Duganella\_sp.\_CF517\_2 |WP\_090321564.1 HAMP domain-containing protein  
700 [Duganella sp. CF517]  
701 MNMLENISIGKRLAFGFTVILAFAMLITGIVSWRQLQGVASATADMMQVPLAKERLIGDWSSNIDSARRTT  
702 AIARSTDTTLGYPYFADEAKASSAKSSDYQKKIEALITDADEKDLFARIGEQRKIYLSREKLTKLKAAGEL  
703 EESNKVFESVFRPCTAAYQALVGDLLKMQRAKIDATAANIDAVAASSRNLLYVLAALVLTFGVVCALLTT  
704 GIVRPLREAVVARRVASGDLTGHDASARDETGQLLAALKEMNASLLGIVTEVRSRGTDHITTSSEIAAG  
705 NQDLSSRTEEQAGALEETASSMEELTSTVKHNADNARQANQLAASAAQVAVKGGAVVAEVVGTMDSSINSS  
706 KRIVDIIISVIDGIAFQTNILALNAAVEAARAGEQGRGFVAVASEVRNLAQRSASAAKEIKALIGDSVDKVN  
707 QGSRLVANAGVTMEEIVSSVHRVSDIIEITAASSEQSAGINEVNQAIQSMDAVTQQNAALVEEAAAAAAS  
708 MQQQAAALAQVVSFVKVNDSGRPYLKSKATAPARRLAQVGRISAA  
709 >Ralstonia\_sp.\_NFACC01\_1 |WP\_092969169.1 HAMP domain-containing protein  
710 [Ralstonia sp. NFACC01]  
711 MQLIRNMGIGKRLAFGFVVLAFSVVITAIWRLDNAATATRMMNEPLLKERLIGDWYANLVVGIRRTI  
712 AVAKSADPTLGPYFAQEAASSKASGEYQKKVEALLSTEEKTLFAKIGELRKGYSARDAINAAKASGNP  
713 DEAQRVLDQVFPANAYQDIMRQLLEVQRRSIDDIAKDIDASAAKSRTLLMVLEGLILALGLVFAYFLTV  
714 SITRPLHVAVGIASRVAAGDLSVAAANSKDETGKLLQALADMTQQLVGTVGSIRVATESVAGAAGQIAAG  
715 NMDLSTRTEQQAASIEETAASSTELTEAVKRNAENARQATS LAASAREMTEAGRVEVTAMVQTVSEVSTAS  
716 KKIAEITGLIEGIAFQTNILALNAAVEAARAGEQGRGFVAVAGEVRSQAQRASGAAKEVKELIEASTGKVE  
717 LSSEQASGVNAAMARVVAIEGVSSIIAEIIVASDEQSQNLEQVSQAISQIDQVTQQNAALVEEAAAAQA  
718 MQEQSGNLRRAVSVFRLGAG  
719 >Duganella\_sp.\_CF402\_2 |WP\_092269791.1 HAMP domain-containing protein  
720 [Duganella sp. CF402]  
721 MNMLANISIGKRLALGFTIILAFAMLITGIVSWRQLQGVASATSEMMQVPLAKERMISDWGKIDSGIRRTT  
722 AIARSSDASLGAYFAEESKASSAASSELQKKIETLISDADEKELFTRIGEQRKVYLSRSDQIAKLKTAGEL  
723 DEASKIFDVTFRPGTAKYQELIVELLKMQRAKIDAAAHEIEDVANSRKLTYTLAVLVLAFLGVTCAWMLTT  
724 GITGPLQEAVTAARRVASGDLTGHDIDSAKDETGQLLSALKEMNSALLGIVTEVRSRGTDHITTSSEIAQG  
725 NQDLSSRTEEQAGALEETASSMEELTSTVKHNADNARQANQLAASAAQVAVKGGDVVAQVVGTMDSINQSS  
726 SKIVDIIAVIDGIAFQTNILALNAAVEAARAGEQGRGFVAVASEVRNLAQRSASAAKEIKALIGDSVEKVN  
727

728 LGSKLVADAGSTMGEIVASVQKVSMDISEITAASSEQSAGINEVNOAILSMDAVTQQNAALVEEAAAAAES  
729 MQHQAASLAQAVSVFKVNDNVAAFAPRSSTAAPRAPSSSRLALKLAKRA  
730 >Herbaspirillum\_frisingense\_2 |WP\_006464989.1 HAMP domain-containing  
731 protein [Herbaspirillum frisingense]  
732 MSYFSHMKIGRRALGFVILAAASVVVALSIWRLHGIAAATDEMMEPLTKERLVS DWYRTIHTSVRRTT  
733 AIAKSADASLAFFADDAASRMSTEQQKAIEALLES DQEKEVF AKLSAVRKDYIKYRDAISKAKADGQT  
734 EEAARILAGPYDVA AKGYLDLLQQLLNVRANIDQVAVHIHDTY LQSRNLMLLAVLQVVLGWL FARS LAL  
735 GITRPLEQAVDVAEAVAAGDLTMRVDETLAARRDETGKLMHALHAMTGNLARI VQGVRSGTDAIATASREI  
736 ATGNLDLSARTERQAGALEETASAMEELTSTVSNADNARQANQLAASASSVAQQGGEVVSQVISTMGSIN  
737 ESSRKIVDII SVIDGIAFQTNILALNAAVEAARAGEQGRGF AVVASEVRSLAQRSASAAKEIKTLIDDSVS  
738 KVGSGSELVVRAGSTMDEVVSSVHQVAQIVAEITAASSEQSDGISQVNLAINDMDQTTQQNAALVEQAAAA  
739 AEAMQEQAARLSEVVSQFRLLAQDQVAYAHAGSV DITPLR PALR  
740 >Janthinobacterium\_sp.\_GW456W\_1 |WP\_086148602.1 HAMP domain-containing  
741 protein [Janthinobacterium sp. GW456W]  
742 MNVLRNVSIGVRLGLGFVILLF SMLITGISVWRLH DVASATRVMMEQPLAKERYIS DWYGRIDS AVRRTI  
743 AIARSSDTSLSGYFAEESKVSSASSAELQKKIEALIDKPEEKAMFAGLLEQRKVYIGSRDQVYKLGKGAQV  
744 DAANEVFEKTFVPA AAKYQK MVQDLLEHQRASIDTTAREIDAVANSSRNLMVLVLAALALAFGVVCAWVLT  
745 GIVRPLRTAVDVAR KVDAGDLTAQIDASAKDET GQLLQALKDMNTSLLNIVGEVRS GTDSIATSSTQIAAG  
746 NQDLSRTEEQAGSLEETASSMEELTSTVKQ NADNARQANQLAASAAQVAVKGGEVVAQVVG TMESINX TD  
747 SIAKSSTQIAAGN QDLSRTEEQAGSLEETASSMEELTSTVKQ NADNARQANQLAASAAQVAVKGGEVVAQ  
748 VVG TMESINASSNKIVDII SVIDGIAFQTNILALNAAVEAARAGEQGRGF AVVASEVRNLAQRSASAAKEI  
749 KTLIGASVEQVNAGSRRVAQAGSTMTDIVDSXIVDII SVIDGIAFQTNILALNAAVEAARAGEQGRGF AVV  
750 ASEVRNLAQRSASAAKEIKTLIGASVEQVNAGSMLVAQAGSTMTDIVDSVQRVSDIITEITAASSEQSVGI  
751 DEINRAIQMDAVTQQNAALVEESAAAAESMQHQAHNLAQVVS VFKLNGQQASGANGVTHALKRPAQAQTA  
752 LRIGTR  
753 >Pseudorhodoferax\_sp.\_Leaf265\_1 |WP\_056673977.1 HAMP domain-containing  
754 protein [Pseudorhodoferax sp. Leaf265]  
755 MKNLRIGTRLGGGFALILVVMALITAVGLWRLQTVAQATQAMTQQPLAMERMIS DWYRYVYSGARRTTAIV  
756 KSTDPSLGFQFFAADAASSTKESGELQKRIEPLLSNPEEQALWAIQOGRLLYLS SRDQAVKAKSDGQAE EA  
757 ERLLTQVYLPATDKYTS LIQQLLDLQTRIDATAQRIDGIYGESRLLMLGLGLLGLLAGGLF AWRLTVGIT  
758 QPLAQAVRVARAVAASDLTSRVTVP SRDETGQLLQALQDMNASLSGVVASVRS GTDSIATASSEIDAGN QD  
759 LSSRTEEQASSLQQTAA SMEQLTSTVRQ NADNARQANQLAASASKTAVQGGQV VAGVVG TMGAIN DSSRKI  
760 ADIIGVIDGIAFQTNILALNAAVEAARAGEQGRGF AVVAGEV RALAQRSAAA AKDKVQLIGDSVAKVEEGS  
761 AQVAEAGRTMDAIVQSVQRVSDLVAEITAASQE QSGIEQVHQAVSQMDT VTTQQNAALVEEAAAATGALKA  
762 QASQLASAVSVFRIEGGVAPQSAVGAARAAAVPARRAPQAPRKLPPAPASRSPAVAAPTRVAKAARPAPAP  
763 APALAQGDGDWESF  
764 >Herbaspirillum\_sp.\_GW103\_2 |WP\_008330097.1 methyl-accepting chemotaxis  
765 protein [Herbaspirillum sp. GW103]  
766 MNILGNMNI GKRLTLGFVILAFSAIVAGISLWRLEQVASATREMMSDPIKTERLMGDWYTNLTAGIRRTL  
767 AIAKSSDPSLATYFAEEAAASTKSSTEYQKQVEPLLVTPEEKALFQKIGEQRKVYLS SRDEIVKLKAAGNV  
768 EEAMRLLDKVFPAAATYQKLMRDMVDIQRQDIDETAKEIDHIAVQSRILILVLEGLILLGLIVLARLLTL  
769 GITRPLQTAVVVS RKVAEGDLATQVQVNSRDET GQLLQSLKEMNDSLRSIVSNVRNGTDTISTASAEIAAG  
770 NLDLSRTEEQQASSLEETASAMEELISTVRQ NADNARQASQLAQSASSVAEQGGGVVSQVVD TMGAIN ASS  
771 RKIVDII SVIDGIAFQTNILALNAAVEAARAGEQGRGF AVVASEVRSLAQRSASAAKEIKELINDSVAKVG  
772 DGSRLVEQAGATMQEVVSSVRHVTDIVAEISAASAEQTS GIEQINLAITQMDQVTQQNAALVEQAAAAAAS  
773 MQNQAGRLAQMVSVFRVNEGEAPVRREIDVTPAGPTLPH  
774 >Massilia\_sp.\_Root418\_1 |WP\_056397818.1 HAMP domain-containing protein  
775 [Massilia sp. Root418]  
776 MSILSNISIGKRLALGFVILALS VTIITGVAIWRLHG VASATKAMMEVPLAKERMVSDWSSKIDS AIRRTT  
777 AIVRSSDPSLVDFADEAKSSAVSAELQKKIEALIDDEKELFARIGEQRKIY LASRKVTKLKAAGALE  
778 EAEAHFKNVFAPGAAAYQGLMAELLQRQRSKIDAIGLEIERGADASRSL LIALTALVLVFGVVC SWLLTVG  
779 ITRPLCQAVAAARRVAGGDLTGRITVSGSDETGQLLQALQDMNGALLNIVMQVRS GTAQIETSSEIAAGN  
780 QDLSRTEEQAGSLEETAASMEELTATVKNNAGNARQANALADAAADVAVKGGAVVSEVVG TMDAINAASR  
781 KIVDII SVIDGIAFQTNILALNAAVEAARAGEQGRGF AVVASEVRTLAQRSAAA AKEIKELIGDSVDKVNQ  
782 GSKLVADAGATMQDIVDSVHRVSTIITEIT TASKEQSAGIDEVYKAI GEMDQVTQQNAALVEQSAAAAESM  
783 QQQAAQLAQVVS VVQVGGAADASAGRAYAGAASARRVKGGSKLALR

784 >Cupriavidus\_sp.\_NH9\_1 |WP\_078200793.1 HAMP domain-containing protein  
785 [Cupriavidus sp. NH9]  
786 MKNLGIGVRLGIGFGVLLLSALMTVFGMVRLQQVAEHTHAMMQPLTKERLVSDWYRLMHTSVRRTTAVA  
787 RSADPSLGAFFAAETKASIEGIAALRDKIQPLLSSEEEKAQFKILSVRDPYNNGRDKITKCLKQEGLTEEA  
788 NQVLEKEFVPAGDAYLAEIQKLLDIQRGSIDATAREVDGIYVARNLSIALGVVLAIGIAFSVWLTVGIT  
789 RPLHRAVAVARTVALGDLTSRIDVDSRDETGQLLQALADMNANILRIVRQVRAGTESIVSGTSQIAAGNTD  
790 LSQRTEEQASSLQQTAAASMEELTSIVRQNADNARQASTLAVNASDIAEKGGDAAGKVAETMEEINGASRKV  
791 VDIIAVIEGIAFQTNILALNAAVEAARAGEQGRGFVAVAGEVRTLAQRSASAAKEIKALIGDSVDRVEKGS  
792 MQVTQAGQTMVEIVA AVKRVTDIMGEISAASAEQSAGIEQVNQAVTQMDTQNAALVEEAAAAAGSLEE  
793 QAQRLKEAVSTFRLAA  
794 >Pseudorhodoferax\_sp.\_Leaf274\_1 |WP\_056899314.1 HAMP domain-containing  
795 protein [Pseudorhodoferax sp. Leaf274]  
796 MNLNRIGTRLGGGFALILLVMALITAVGLWRLQTVASATSDMTQQPLAMERMISDWYRYIYSGARRTTAIV  
797 KSSDPSLGQFFAADAFAFSTKESAEQKRIEPLLDPEQEKALWEEIQKARAVYLSRDAAVKAKGEGQADEA  
798 ERLLTQVFLPATEKYTALIQQLLDLQRASIDATATRIDIYGESRLLMLGLGLLGLLAGGLFAWRLTAGIT  
799 QPLAEAVRVARAVAANDLTSRVTVQSRDETGQLLQALQDMNASLSGVVARVRSQDGIATASSEIDAGNQD  
800 LSSRTEEQASSLQQTAAASMEQLTSTVRQNADNARQANQLAASAKTAVQGGQVVAGVVGTMGAINDSSRKI  
801 ADIIGVIDGIAFQTNILALNAAVEAARAGEQGRGFVAVAGEVRLAQRSAAAADKVKQLIGDSVAKVEEGS  
802 AQVAEAGRTMDAIVQSVQRVSDLVAEITAASQEQSQGIEQVHQAVSQMDTQNAALVEEAAAATGALKA  
803 QAGQLATAVSVFRIETGGVLPHGTPAAAPAQRPVLAAPAMLATPARPARPSIAPATRRRAVPAKAAAAPHK  
804 TPTKAAAKEPALAGARGDDDWESF  
805 >Ralstonia\_sp.\_25mfc04.1\_2 |WP\_092602036.1 HAMP domain-containing  
806 protein [Ralstonia sp. 25mfc04.1]  
807 MAFIGNMKIGKRLALGFLSLILAFSIAITAIWRLDNVAAATREMMKVPLLKERLIGDWYANLASGIRRTS  
808 AIAKSSDPALGPYFAEEAATSSKNSGELQKKVEALISTEEERLFSKIGESRKAYLSSRDDINKAKAAGNV  
809 DEATRILDKVFTPAANAYQGTMRRELVEVQRRTIDDTAKEIDGVAAKSRALLLVLEGIILILGIMCAYFLTR  
810 SISRPLAQAVSVSRRVADGDLSSIEVVTSRDETGELLQALKDMNDKLGTVGNIRSASVAVASAAGQIASG  
811 NLDLSSRTEEQAASIEQTAASMVELTETVQNADNARQATSLAGSAREMTESGRSDVAAMVQTVGEVNAES  
812 VKIAEITGMIEGIAFQTNILALNAAVEAARAGEHGRGFVAVAGEVRS LAQRASGAAKEIKELIETSTLKVQ  
813 VQAQQADGVSAAMGRISTAIERSVDIIGEISAASDEQSRNLEQVSLAIAQIDQATQNAALVEESSAAAQA  
814 LREQAVGMKEEVMYFKTSGQFA  
815 >Acidovorax\_konjaci\_1 |WP\_092951382.1 HAMP domain-containing protein  
816 [Acidovorax konjaci]  
817 MRNFSIGARLGGGFALVFLMALMTAFGLWRLQTVAQATHEMTQQPLANERMISDWYRYVDSAARRTTAV  
818 KSTDPSLAFFAEDSAMTTRESAKLVEKIEPLLDSPA EKAVWADISKARAAYLASRDQAVKAKAAGQADEA  
819 ERILNQVYLPATKDYVALIQKLLDLQRSDIDATAGNIQGIYAQSRLLLVVFGLLALALGAACALWLTRGIV  
820 RPLSEAVRVARAVAASDLTSHVTVETSDETGQLLQALKDMNESLAQVVGRVRSQDTSIATASNEIDAGNQD  
821 LSSRTEEQASSLQQTAAASMEELTSTVRQNADNARQANQLASSASETATKGGQVVAGVVDTMGAIHSSRKI  
822 SDIIGVIDGIAFQTNILALNAAVEAARAGEQGRGFVAVASEVRALAGRSAAAADKIKLIGDSVSKVSEGS  
823 QQVAEAGRTMDEIVQSVQRVSDLVAEISAASEEQSRGIDQVHQAVSQMDQVTQNAALVEEATAATGSLKA  
824 QASQLAQAVSVFRI PAGVQAAGAVAARPAAPAFRAPAVQAARPAVAAAAPRAAAAPLPAAPAPALPRT  
825 PAAPSAGASRPAAAPPAARGDDDWETF  
826 >Acidovorax\_citrulli\_1 |WP\_046059968.1 HAMP domain-containing protein  
827 [Acidovorax citrulli]  
828 MRNLSIGTRLAGGFALVFLMALMTVFGWLRLHVAQATHDMTQQPLANERMISDWYRYVDSAARRTTAV  
829 KSSDPSLAFFAEDSAMTTRESAQLVEKIEPQLDSTEEKAVWADI AKARSAYLASRDQAVKAKAEGRTEEA  
830 ERLLTQVYMPATKAYVALIQKLLDLQRDIDATAAHIQDIHAQSRLLLTVLGLLALALGAACALWLTRGIV  
831 RPLSEAVRVARAVAASDLTSHVTVTSGDETGQLLQALKDMNTSLAQVVGRVRSQDTSIATASNEIDAGNQD  
832 LSSRTEEQASSLQQTAAAMEQLTSTVRHNADNARQASQLASSAAGTATRGGQVVAGVVDTMGAINSSRKI  
833 SDIIGVIDGIAFQTNILALNAAVEAARAGEQGRGFVAVAGEVRLASRSAAAADKIKALIGDSVTRVAEGS  
834 SQVEEAGRTMDEIVQSVQRVNDLVAEISAASEEQSRGIDQVHQAVSQMDQVTQNAALVEEAAAATGSLKA  
835 QAGQLSQAVSVFRI PAGTQAATAAAAAAPAAMP RPVRQPAAAVTPRAAPAAMP PAAAAPRAAATARAPAAAP  
836 ALPRTAAPAPSPAARGSDDDWETF  
837 >Janthinobacterium\_sp.\_S3-2\_1 |WP\_065306039.1 methyl-accepting  
838 chemotaxis protein [Janthinobacterium sp. S3-2]  
839 MNLLRNVSIGVRLGLGFAGILLFSLITGISVWRLHVAADTRVMMEQPLAKERYISDWYSKIDSGIRRTT  
840 AIARSSDTTLGAYFADESKASSVISGELQKKIEALLVTTTEEKEIFRNVSEMRKVYLSRRDQIYKMKTDGQL



841 DEAKVVFENTFVPGSAKFQKFVQDLLLHQRASIDATAHDIDTMAITSRNLLLGLAVLALAFGTVCALLTT  
842 SIVHPLRTAVAVARRVADGDLTALIDASAHDETQGLLRALKDMNASLLRIVGEVRSMTDSIATSSTQIAAG  
843 NQDLSRTEQQAGSLEETASSMEELTSTVKQNADNARQANQLAASASQVAVRGGEVVAQVVGTMESINASS  
844 NKIVDIIAVIDGIAFQTNILALNAAVEAARAGEQGRGFVAVASEVRNLAQRSQAQKEIKTLIGASVEQVN  
845 AGSLLVAQAGSTMNDIVSSVQRVGDIITEITAASSEQSVGIDEINRAIGQMDAVTQQNAALVEEAAAAAES  
846 MQHQAQKLAEVVSVFKLHERSALALR  
847 >Herbaspirillum\_sp.\_VT-16-41\_2 |WP\_077238267.1 HAMP domain-containing  
848 protein [Herbaspirillum sp. VT-16-41]  
849 MNILGNMNIGKRLTLGFAIILAFSVVVAGMSLWRLEQVSSATREMMSDPLKTERIMGDWYTNLSSGIRRTL  
850 AIAKSSDPSLGPYFAAEAAESTRSSTEYQKAVEKLLVTPREKELFQKIGEQRKIYLSRRDQIVKLKAEGKV  
851 DEAMQLLDKTFVPAALYQQLMRDMVDLQRKIDIDDTAKEIDDIAAQSRVLILVLEGLILLGLIVLARYLTL  
852 GITKPLHTAVTVSRKVAEGDLAQVQVSTRDETQQLLQSLRDMNDSLRGIVTNRVTGTDITSTASSEIAAG  
853 NLDLSSRTEQQASSLEETASAMEELISTRQONADNARQASQLAHSASAVAEQGGGVVNVQVDTMGAINASS  
854 RKIVEIISVIDGIAFQTNILALNAAVEAARAGEQGRGFVAVASEVRSLAQRSASAQKEIKELINDSVEKVD  
855 DGSRLVEQAGNTMQEVVSSVRRVTDIVAEISAASAEQTSGLIEQINLAITQMDQVTQQNAALVEEAAAAAES  
856 MQNQAGQLMQMVSFRLSEGEPPVVRREIDVTPGTPLPG  
857 >Acidovorax\_cattleyae\_1 |WP\_092839683.1 HAMP domain-containing protein  
858 [Acidovorax cattleyae]  
859 MRNLSIGTRLAGGFALVGLMALMTTFGLWRLQSVQATHAMTQQPLANERMISDWYRYVDSAAARRTTAIV  
860 KSSDPSLAFFAEDSAMTTRESARLVEKIEPQLDSPEEKAVWADIKARTAYLASRDQAVKAKAEGRADEA  
861 ERLLTQVYLPATKAYVALIQQLLDLQRRDIDATAAHIQDIHAQSRLLLIVLGLLALALGAACAVWLTRGIV  
862 RPLSEAVRVARAVAASDLTSHVTVSADETGQLLQALKDMNKSLAQVVGVRVAGTDSIATASNEIDGGNQD  
863 LSSRTEEQASSLQQTAAAMEQLTSTVRHNADNARQASQLASSAAGTAARGGQVVAGVVDTMGAIHSSRKI  
864 SDIIGVIDGIAFQTNILALNAAVEAARAGEQGRGFVAVAGEVRALAGRSAAAADIKALIGDSVSRVAEGS  
865 SQVEEAGRTMDEIVQSVQRVNDLVAEISAASEEQSRGIDQVHQAVSQMDQVTQQNAALVEEAAAATGSLKA  
866 QAGQLSQAVSVFRIIPAGTQQAQAAVAPAMDP SARHVPVGPPTPARAASGAVRAPAPVAPPRPAPARPPAAAQ  
867 ALPRTAAPAAATAPKASRGSDDDWETF  
868 >Acidovorax\_sp.\_Leaf160\_1 |WP\_056665002.1 methyl-accepting chemotaxis  
869 protein [Acidovorax sp. Leaf160]  
870 MNNLKIGARLGGGFALVLMMLMFTAAGVWRLHTVAQATSEMTQQPLANERMISDWYRYVYSAARRTSAIV  
871 KSSDPSLQGFFAADIATTTKEAAQLQORIEPLLDSAEEKALWGEIQKARTLYLSSRDQAVKAKADQAEAA  
872 DRLLTQVFLPATDQYALIQRLLDMQRGSIDATARDIDNVFRQSRWLILLGTAALALGAACAWWLTRGIV  
873 RPLSQAVRVARAVASSDLTSQVTVSSTDETQQLLQALKDMNASLAQVVGVRVRSMTDSIATASGQIDAGNQD  
874 LSSRTEEQASALEETAASMEELTSTVKQNAENARQANQLAASASQTAAQGGQVVAGVVDTMKGINDSSRKI  
875 SDIIGVIDGIAFQTNILALNAAVEAARAGEQGRGFVAVAGEVRALAQRSASAADIKGLIGDSVAKVEEGS  
876 QQVAQAGRTMDNLVQSVQRVSDLVAEISAASQEQSAGIDQVHQAVSQMDSVTQQNAALVEEAAAATGSLKS  
877 QASQLAAAVSVFRIDAGSQAAAQALRAAAATASVAPVAPRAVTALQRAPAVAAPAPRPAAPAAAAPAAKAAA  
878 HPAASRLAPPKPRAAATPPSPAARGSDDDWETF  
879 >Polaromonas\_sp.\_OV174\_1 |WP\_092007234.1 HAMP domain-containing protein  
880 [Polaromonas sp. OV174]  
881 MSLKLNKIGMRLGLGFLAMLLMAFIAGIGIWRLQTVADATRDMMELPLAKERMISDWSRLVYVGVTRTSA  
882 VAKSSDPSLAFFAKDSAASSLEASAFKLEPLLTSDAEKAGMQAMQDKRKPVAARDAIYKAKAAGDSE  
883 EAARLIEVYLPFGASYQSALQDLVDLQRKSIDGMAGHVDELAQASRTLMGVLGLLATVFGVVCALLTRSI  
884 TQPLSQALKLAETVASGDLSSSTIVVNSRDETQQLMQALKAMNDSLAKLVGEVRQGTDTIATASGQIAAGNQ  
885 DLSSRTEEQASSLEETAASMEELTSTVKQNADNARQANQLAVSASSVAVKGGSVVSVQVVDTMGSINASSRK  
886 IVDIIGVIDGIAFQTNILALNAAVEAARAGEQGRGFVAVAAEVRNLAQRSAAAQKEIKTLIDDSVSKVEEG  
887 SSQVAEAGKTMDEIVDSVKRVTDIMAEITAASSEQTSGLIEQINQAITQMDQVTQQNAALVEEAAAAAQSLQ  
888 EQASGLSQVSVFKLDGAQAQPIHVAQARRAMPARSAKPGAAPRQPPTLKPAIAAPAAAAGDWETF  
889 >Cupriavidus\_sp.\_SK-3\_1 |WP\_035861449.1 methyl-accepting chemotaxis  
890 protein [Cupriavidus sp. SK-3]  
891 MKNLIGVRLGIGFGVLLSTFMTVFSVMGLHEVAQRTHDMMQPLAKERVVSDWYRLMHTSVRRTTAVA  
892 RSSDPGLGAFFAAETKGSVEAIAALRDKIEPMLSSEAEEKAAFQTIQAVRKPYNDSRDKITKLKEEGSTDEA  
893 NRVLEAEFVPAGNAYLAEIQKLLDIQRTSIDTTAQHINGIYETTRNRLIVLGLLVLAIGVAFSLWLTIGIT  
894 QPLHRAVGFARKVAAGDLTSRIDVDSKDETQQLLQALNEMNGNILRIVTQVVRTGTESIAGTSQIAAGNTD  
895 LSQRTEEQASSLQQTASSMEELTSIVRQONADNAKQASSLAVNASEIAVRGGEVVGQVVDTMDEINGASRKV  
896 VDIIAVIEGIAFQTNILALNAAVEAARAGEQGRGFVAVAGEVRSLAQRSATAAKEIKTLIGDSAERVEKGS

897 QLVGQAGHTMEEIVGAVKRVTDIMGEISAASAEQSAGIEQVNQAVTQMDTQNAALVEQAAAAAGSLEE  
898 QAQRLQAVSSFRLVAA  
899 >Massilia\_sp.\_NR\_4-1\_1 |WP\_050408258.1 methyl-accepting chemotaxis  
900 protein [Massilia sp. NR 4-1]  
901 MNALNHISIGKRLAIGFAVILAFCLITGIGMWRLQOVAQATKMMETPLAKERMISDWHSRIDSAIRRTT  
902 AIARSSDQSLGAYFAEESKASSAASAEQKKIEDLLQDEDEKALFAKSMEQRKVYLSRRDQVAKLKSAGEL  
903 EPAQEVFEKTFVPGAAKYQSLVQDLLKMQREKIDATARHIEGIAINSRTLLLVLVSVLVLGFGAVCAWLLTV  
904 GITAPLSRAVDAARRVASGDLGQIDVAGSDETQQLLQALKDMNQSLLNIVTEVRNGTDSINTSSSEIAAG  
905 NQDLSSRTEEQASALEETASSMEELTSTVRQNADNARQANQLASAAASVAVRGGSVVTVNVGTMESINESS  
906 RKIVDIISVIDGIAFQTNILALNAAVEAARAGEQGRGFVAVSEVRNLAQRSASAAKEIKELIGDSVEKVN  
907 QGSKLVAEAGSTMEEIVASVHRVSDIISEITAASSEQSVGIEEVSRAIGQMDQVTQNAALVEESAAAAES  
908 MQHQAHSLAQVVSFVNVGQMGKPALRLGR  
909 >Cupriavidus\_basilensis\_1 |WP\_006163414.1 methyl-accepting chemotaxis  
910 protein [Cupriavidus basilensis]  
911 MKNLIGVRLGIGFGVLLSTLMTVFSILGLQDVASHTHMMQPLAKERVSDWYRLMHTSVRRTTAVA  
912 RSSDPSLGTFFAAETKGSVDAIAALRDKLEPMLTSDAEKAAFKTIQTVRKPYNESRDKITKLKEAGQTDEA  
913 NQVLDSEFVPAGNAYLAEIQKLLDIQRASIDQ TALAINIYLSARNRLIALGVLVLAIGVAFSAWLTAGIT  
914 APLHRAVGFARKVASGDLTSHIRSDSKDETQQLLRALGDMNGNILRIVTQVVRTGTESI ASGTSQIAAGNTD  
915 LSQRTEEQASSLQETASSMEELTSIVRQNADNAKQASSLAVNASEIAVKGGMVVGVVDTMQEINGASRKV  
916 ADIIAVIEGIAFQTNILALNAAVEAARAGEQGRGFVAVSEVRNLAQRSATAAKEIKSLIGDSVERVEKGS  
917 QLVTTAGQTMDEIVGAVKRVTDIMGEISAASAEQSAGIEQVNQAVTQMDTQNAALVEQAAAAAGSLEE  
918 QAQRLKEAVSTFRLVAA  
919 >Herbaspirillum\_seropedicae\_1 |WP\_069374298.1 HAMP domain-containing  
920 protein [Herbaspirillum seropedicae]  
921 MNIIIGNMNIQRRLTLGFALILTFSSIIAGIGLWRLDHVAQATREMMAEPLKTERLMADWYTNLVAGIRRTI  
922 AIAKSSDPALGPYFAAEVAASSKSSGEYQKQVEALLSTPEEKALFQKIGELRKLYLSSRDEINKAKAAGNT  
923 EEAMRILDQVFPNATAYQDTMRKLVDFQRKEMDDTAREIDATAAKSRTLILVLEGLILLGGVVFARYLTL  
924 GITKPLHRAVDVSRVAEGDLSSEIAVTSRDETQQLLQSLKDMNQSLRGIVSNVRSRGTDTISTASSEIAAG  
925 NLDLSSRTEEQASSLAETASAMEELIIVRQNADNARQASQLANSASAVAEQGGGVVSQVVDTMGAINASS  
926 RKIVDIISVIDGIAFQTNILALNAAVEAARAGEQGRGFVAVSEVRNLAQRSASAAKEIKELINDSVGKVD  
927 DGSRLVEQAGNTMQEVVSSVRRVTDIVAEISAASTEQTHGIEQINLAITQMDQVTQNAALVEEAAAAAAS  
928 MQTQAGRLMQMVSFRLSEREPLVRREIDVTPSSPVLQ  
929 >Massilia\_sp.\_Leaf139\_1 |WP\_056332738.1 methyl-accepting chemotaxis  
930 protein [Massilia sp. Leaf139]  
931 MGFISNIKIGKRLGLGFALILAMTVLIACAGIWRLENEVADATRMMMAAPLTKERLITDWYSLNFASIRRTA  
932 AIVKSTDPALGPYFKEDAAASVKKAAELLKEIEPLIAGDAEKALFAKILEQRKLYSASRDGAVKAKAAGNE  
933 EEAAKLLDEKFTPAASKLYQELLHELVMQRTSIDATAKAIDASAGRSTTIIAALTAVAVLLGAALSWLLTN  
934 GITRPIRDALELAETVAGGDLTRNIDASAKDETGALLRALRHMNDSLKIVTQVRNGTDTIATGSAEISAG  
935 NLDLSARTEQQAGALEETAASMEELTTTVRQNADNARQANQLSIAASEVAAQGGAVVGQVITTMGSINESS  
936 RKIVDIIGVIDGIAFQTNILALNAAVEAARAGEQGRGFVAVSEVRNLAQRSASAAKEIKVLIGDSVDKVD  
937 VGAKLVDQAGATMEQVVSIRRVTDIMAEITHASQEQTGGIEQVNQAIGQMDQVTQNAALVEEAAAAAGS  
938 MQDQAAKLAQVVSFVFLSGPALGAPAVASARTAVPARALARSAPAVRVAKAAPAKAPARVSEDEWETF  
939 >Oxalobacteraceae\_bacterium\_IMCC9480\_1 |WP\_040727868.1 methyl-accepting  
940 chemotaxis protein, partial [Oxalobacteraceae bacterium IMCC9480]  
941 MIPQFIRDLTIGKRLGLGFVLLMLSMATTAIGITRLNAVASATRELLKEPLATERLVSDWNRNISAGVRR  
942 TSAIARSSDPSLATFFAEDQASSTKNSSELQKAIGERMRTVREKAVFAEVGELRKVYLSRRDQIVALKKEG  
943 KLDEANQLLDQFTFPAKKNYLIKIDELQGEERRQIDQTAIDIEASYEAGRNLMLILAVVMLIQGVLVSWLL  
944 SRSITGPLANAVRFAREVASGNLTATIHSRRRDESGQLTDALQTMVTNLSTLVTVGRIATDNI SVSAQQIA  
945 SGNADLSNRTEQASSLEETASSMEELTSTVRQNADHAQQATQLAVVASGVAVRGGAVVRQVVTMAAIND  
946 SSRKIVDIIG  
947 >Acidovorax\_ebreus\_1 |WP\_012655282.1 methyl-accepting chemotaxis  
948 protein [Acidovorax ebreus]  
949 MKNLSIGTRLGGGFALVLLMALMTAFGVWRLQTVQATNEMTQQLAVERMISDWYRYVYSAARRTSAIV  
950 KSTDPSLQGFFAADTATSTRESAELQKRIETLLTSEEEKALWADIQKARVTYLSSRDQAVKAKAEGQLEEA  
951 ERLLTQVYLPATDQYVALIQRLLDMQRSRIDATAQGINVYTYGQSRLLVIVLGVGLGAGALCAWWLTRGIT  
952 RPLAQAVQVARAVAANDLTSRVQVDSRDETQQLLQALQEMNASLSQVVARVRSRGTGDIATASSQLDAGNQD  
953 LSSRTEEQASSLQETAASMEELTSTVRQNADNARQANQLASSAAQTATQGGQVAVGVVQTMGAINASSRKI

954 SDIIGVIDSIAFQTNILALNAAVEAARAGEQGRGFVAVAGEVRLAQRSAAAAKDIKGLIGDSVAKVEEGS  
955 HQVEEAGRTMDAIVQSVQRVSDLVAEITAASQEESAGIEQVHQAITQMDQVTQQNAALVEEATAATGSLKA  
956 QAGQLAQAVSVFRVEGLQAAQTATATATAAAAAPAPLRPPAPATTTTTTTKPPAAARTLAAPARPPAAAKAAP  
957 ATARHSDDDWEAF  
958 >Massilia\_putida\_1 |WP\_075792765.1 HAMP domain-containing protein  
959 [Massilia putida]  
960 MGFVANMKIGRRLGLGFALILAMTVAIAVIGAWRLTEVAGSTRAMMAVPLTKERLITDWYGLNFASIRRTA  
961 AIVKSTDPPLGAYFKDDSAASVKRAAELLKQIEPLIAASGPEHDLFARILEQRKAYSASRDGAVKAKADGN  
962 AEEAARILDQGFTPAAQQYQGLLQDLVAMQRASMDATAAIDANATASTRILIVVFSTCALLLGAVASWLLT  
963 RGIVLPIRAAVAVAETVAAGDLTRTIEAHTHDETGALLRALRHMNDSLGVIVSQVRGGTDTIATASREISA  
964 GNLDLSSRTEQQAGALEETAASMEELTTTVRQNADNARQANQLAISASEIATQGGAVVGEVVTMGINAS  
965 ASRIADIIGVIDGIAFQTNILALNAAVEAARAGEQGRGFVAVASEVRSQAQRSAAAAKEIKDLIAASTADV  
966 NAGTKLVDRAGATMSDVVDSIRKVSIVAEITSATQEQTGGIEQVNQAIGQMDHVTQQNAALVEEAAAAA  
967 SMQDQAAKLAEVVSVFKLERGHSALPVPALPRAALRAPAAVR  
968 >Massilia\_sp.\_LC238\_1 |WP\_036214233.1 methyl-accepting chemotaxis  
969 protein [Massilia sp. LC238]  
970 MGFISNIRIGRRLGLGFAVILAMTLLIIVAGISRMNDVAASTRDMMAVPLTKERLITDWYSLNFASIRRTA  
971 AIVKSADPELGPYFKEDAAAASVKKAAELLKQIEPLIAGEKEKALFAKILEQRKTYASRDGAVKAKADGNA  
972 EEAARILEQGFTPAAQKYQDLLHELVLVQRSSIDQTAKAIDESARHNSTVIVSVAAGAVLLGAALSWLLTT  
973 GITRPIHAAVQAAETVASGDLTGHIKADTKDETGALLRALRNMNDSLKIVSEVRSMTDTIATGSAEISAG  
974 NFDLSARTEQQAGALEETAASMEELTTTVRQNADNARQANQLAITASSVALDAGNVVGVVITTMGSINDSS  
975 KKIVDIIGVIDGIAFQTNILALNAAVEAARAGEQGRGFVAVASEVRLAQRSAAAAKEIKTLIGDSVEKVE  
976 AGTRLVDQGTMEQVVTSIRRVTDIMAEIASASQEQTGGIEQVNQAIGQMDQVTQQNAALVEESAAAAAS  
977 MQDQAARLAQVVGFKLDAQAASSTATASAPTAPARTLALAAKPAARPAKPARARATAHTEAEWETF  
978 >Massilia\_sp.\_PDC64\_1 |WP\_091656498.1 HAMP domain-containing protein  
979 [Massilia sp. PDC64]  
980 MGLIANMKIGRRLGLGFALILAMTVAIAAVGAWRLNEVADSTKAMMAVPLTKERLITDWYGLNFASIRRTA  
981 AIVKSNDPPLGYPYFKEDAAAASVKKAAELLKQIEPLIAASGPEHDLFAQIVEQRKVYSASRDGAVKAKADGN  
982 ADEAARILDQSFPTAAEKYQRLQLDLVAMQRTSMDATAAIDANAMASTRLIAIFSSCALLLGAIASWLLT  
983 RGIVLPIRAAVAVAETVASGDLTHTIEAHTQDETGALLRALRHMNDSLGVIVGVQVRGGTDTIATASREISA  
984 GNLDLSSRTEQQAGALEETAASMEELTTTVRQNADNARQANQLAIAASEIATQGGAVVGEVVTMGINAS  
985 ANRIADIIGVIDGIAFQTNILALNAAVEAARAGEQGRGFVAVASEVRSQAQRSAAAAKEIKDLIAASTANV  
986 DAGTKLVQAGATMEQVVDSIRRVTDIMGEITSATQEQTGGIEQVNQAIGQMDQVTQQNAALVEEAAAAA  
987 SMQEQAAKLAEVVGVFKVERGFSLAAPVAAPVARPALPRASAPAPAPKRPVKRAAPVAAGDWEFF  
988 >Janthinobacterium\_sp.\_PC23-8\_2 |WP\_094444369.1 HAMP domain-containing  
989 protein [Janthinobacterium sp. PC23-8]  
990 MNLLRDVSI GMRLLGLGFAGILLFSILITGISVLRHLNVATDTRLMMEQPLAKERYISDWYKIDSGIRRTA  
991 AIARSSDTTLGAFFADEAKASSVVSSELQKKIEALLSTPEEKEMFRQISEMRKAYIISRQIYKMKKDGQF  
992 DEAKVVFDA AFLPGSAKFLKVTQDLLQYQRTSIDATAHDI DAMAVASRNL LCLAVLALAFGGVCAWLLTT  
993 SIVHPLRAAVSVARRVAAGDLTAQIDASAQDETGQLLLALKDMNASLLRIVGEVRSMTDSIATSSTQIAAG  
994 NQDLSRTEQQAGSLEETASSMEELTSTVKQNADNARQANQLAASAAQVAVKGGEVVAQVVGTMESINSSS  
995 NKIVDIIGVIDGIAFQTNILALNAAVEAARAGEQGRGFVAVASEVRNLAQRSASAAKEIKALIGASVEQVN  
996 AGSMLVAQAGSTMNDIVASVQRVSDIITEITAASSEQSVGIDEINRAIGQMDAVTQQNAALVEEAAAAAES  
997 MQNQAHLKLAEVVSVFKLDELSALR  
998 >Massilia\_sp.\_Root335\_1 |WP\_056443095.1 methyl-accepting chemotaxis  
999 protein [Massilia sp. Root335]  
1000 MGFLANMNI AKRLGVGFALVGLTLVIATAAVWRLNAIADATRMMMAVPLAKERMLTEWHMQTFAAVRRRTA  
1001 AIVKSTDPPLVEFFKADGVKTATRSTELVKQIEPLLDGPEEHALFNRIVELRKAYTDSKVKAIKARADGDA  
1002 EAAERILNQEYVPTSDAYEGKQGGEMVKMQQDRIDAIARKIDNANRNSARMIIVLAGVAVLFGAICAWLLAR  
1003 AIVDPIRQAVDVAEKVAGGDLTQRIDATGTGETAALLRALRHMNDGLSVIVSQVRSGTDTIATASAEISAG  
1004 NMDLSSRTEQQAGSLGTTASTVEQLTGTVRQNADNARQASQLSIAASDIIVQGGAVVDQVVQTMGAINSSS  
1005 KKIVDIISVIDGIAFQTNILALNAAVEAARAGEQGRGFVAVAGEVRLAQRSAAAAKEIKQLIVDSVGKVE  
1006 DGTKLVQAGMTMSEVVDSIRKVSIVAEIASASGEQSTGIEQVNRAIAEMDSSTQHNAALVEESAAAATA  
1007 LRDQADKLAEVVSLFHLSTQAAAAPKAVAAPARAPARAVVPPV PARAGAGKPAPGRAAAAAAEWDTF  
1008 >Collimonas\_sp.\_OK242\_1 |WP\_092353905.1 HAMP domain-containing protein  
1009 [Collimonas sp. OK242]

1010 MKIANLKVGTMRGIGFAIILALS SVSTVIGISNLRQVAMATQQMMEKPLVKERLVS DWGLTTS AIVRTSL  
1011 IVKSTDGSLATTF AEDIDASVKKGGELQKTLEPLLI SDAEKELFKS IMGLREKYQQAKVLAMKAKQDGNSE  
1012 ESSRIYNDMFLPNAKNYKGLLDEL LSLQRKSIDQ TGREVAQLYSRSFNL MVLLGVLIVALGAVCAFLI SRS  
1013 VTRPLGEAIKVAQTVASGNLSSRIEVKTT EETGQLMQALKDMNDSLLKVVGDV RIGTDTIATASGQIASGN  
1014 QDLSSRTEQQASSLEETAASMEQLTGT VKQNADNARQANQLAVSASGVAVKGGGVVSQV VETMGSINTSAR  
1015 KIVDIIIGVIDSIAFQTNILALNA AVEAARAGEQGRGFVAVASEVRNL AHRSAAAAKEIKALIDDSVEKVDI  
1016 GVKLV DQAGTTMGEIVDSVKRVTDIMSEITA ASEEQTAGIEQVNQAIMQMDQVTQQNAALVEEAAAAAASL  
1017 QDQAAHLVQVVSFNTGGMAESGGASSKTTNRLSPHAATSGRIA AVPR SARQA AVTNLKLPLKRVANVTAAT  
1018 TADDEWATF  
1019 >Brenneria\_goodwinii\_1 |WP\_048638604.1 methyl-accepting chemotaxis  
1020 protein [Brenneria goodwinii]  
1021 MKNFRIGIRLAVGFGVLIVFSLVMLVSGVYQLRQIDQSTQRMMQEPLNKERLVADWFSVISASVQRSTAVA  
1022 RSSDGLAELFAADNASATKES SARQE QFAKLVS SPEEKALFDKLSEVRQVYIRARDAISAANANGQREQA  
1023 QQLFEQDFRPSRNYLDTLQALRDQQRATINQLGADISR NAGNGYLFLGIIIGLLITVAGSLLAWTFTRSIV  
1024 RPLENALQITNAVAGGDL MHNVRGEGRDETAQLLHALQEMTIQLRTIVGEVRQGSESIAGASSQIAAGNLD  
1025 LSSRTEEQSSALQETAAAEQLASTVRQNAENAKQANQLAQSTTGQAQAGGQLMNDVVQTMGAIDTSSRKI  
1026 VDIIISVIDGIAFQTNILALNA AVEAARAGEQGRGFVAVAGEVRSLAQRSASAAKEIKELIDHSVQTVQTN  
1027 RLVEQAGTSILDIVNGVRKVS DLVGEISSASQEQSLGIDQVNI AVNQMEQTTLQNAALVNEASAATQSLQQ  
1028 QAEQLEQVVSFRLTEEQQISSSAAAASRSAPAATAPRAALALKPAADAKSAEGGWSSF  
1029 >Pseudogulbenkiania\_ferroxidans\_1 |WP\_008952658.1 methyl-accepting  
1030 chemotaxis protein [Pseudogulbenkiania ferrooxidans]  
1031 MRFKFNLTIVGQRLGVGFALVLSLLITIT ALGVWRLHEVALATQGMVQVPIAKERLVS DWYTNIVAGVRRST  
1032 AVAISKDESLAQFFAEDQKYSTQQNNILQKQIEALLYLKEEQALFAEIRQKRQRF LQARDSMTNAKKAGRG  
1033 ELAEQLFHSQFLPASKSYLEKMQAFLRLQRREVD SHARYVDGVYRESRIWMLILG VGAVLLGIIAAWA IAR  
1034 SITRPLRQAIEVAYQVAAGDLTVKFKTCASDETGNLLRALGEMSDGLAKAVKRVRVQAE EEAANMTAQIASA  
1035 SKQIAQRSQTQSTTAASTAVAVEQISTG IASISQRANQLLELTQAGHAQVQEGNRAMSLMEGEIRNTEQSV  
1036 EDIAISVHKFVASVRSITDMTGQVKSIAEQTNLLALNA AIEAARAGEAGRGFAVVADEVKLA EESASSAC  
1037 RIDEITATLNRQSTTVETFLKSGQHALHASRQYLD SVICVLSASGESVEQTSQEVMMV MATSVQGGQAEASQD  
1038 IALNVEQIAQMADDNHRAIQSSEELACQM KLLSDRLHESVELFKV  
1039 >Herbaspirillum\_rubrisubalbicans\_1 |WP\_058896090.1 methyl-accepting  
1040 chemotaxis protein [Herbaspirillum rubrisubalbicans]  
1041 MNILGNMNI GKRLTLGFAVILAFSAVVA AISLWRLEQVASSTREMMNAPL KTERLVADWYTNV NAGIARTL  
1042 AIAKSADASLGPFYFSKDVTASSKMSSEYQKQIQ TLLSTPEEKALFDKIGEQRKIYLSRDEI IKLKAAGNV  
1043 EEAMRVL DKKVFPNAAVFQQLMRQLVDIQRKEMDESAMQID AISAQSHIIILVLEGLILL LGIVLARILT L  
1044 GITKPLQNAV VVSRKVAAGDLSASVQVHSQDET GQLLQALKDMNDSL RGI VSNVRS GTDTI STASSEIATG  
1045 NLDLSSRTEEQAGSLAETASAMEQLISTVRQ NADNARQASQLAQSASSVAEQGGGVVSRVVD TMGAINASS  
1046 RKIVDIIIGVIDGIAFQTNILALNA AVEAARAGEQGRGFVAVASEVRSLAQRSASAAKEIKELIDHSVAKVG  
1047 DGSRLVEQAGSTMQEVVSSVRHVTDIVAEI SAASAEQTNGIEQINLAI TQMDQVTQQNAALVEQAAAAAAS  
1048 MQDQAGRLAQMVSI FRLHEGEALAQREIDVTPVMPGIAH  
1049 >Herbaspirillum\_rhizosphaerae\_3 |WP\_050475649.1 methyl-accepting  
1050 chemotaxis protein [Herbaspirillum rhizosphaerae]  
1051 MNFFANMNI GKRLNLGF AII LFS AIGVIAVSIWRLHTVAETTQAMMEKPLAKERLVS DWYRTIHTSVRRTT  
1052 AIAKSSDPSLGAFFAEDAATSTKLSNEQQKALEALLTSDREKELFAQLSAVRKRYVAARDAITKAKTDGQV  
1053 EEANRILEKVFVPEAKGYLDSLQQLLDLQRSS IDQIAAS IHELYMTRNLLI AFGVLLFVAGW MFAWRLAL  
1054 SITRPLNQAVGIAETVAAGDLTSRIDTSRKDE TGKLLLALKTMNDNLQRIVGQVRS GTDTI ATASSEIATG  
1055 NLDLSSRTEEQAGSLEETASAMEELTSTVKQ NADNARQANQLAVSASDVAVQGGSVVAQVIDTMGAINESS  
1056 KKIVDIIISVIDGIAFQTNILALNA AVEAARAGEQGRGFVAVASEVRSLAQRSASAAKEIKELIDNSVQKVD  
1057 SGSKLVEQAGATMTEVVASVRRVTDIVGEI SSASQE QSDGIEQVNRAIAQMD ESTQQNAALVEQAAAAAQS  
1058 LQDQAHTL TEVVSIFKLDGAGGASLRHAAS PMAASATAAAPAMKSQPVAMSAARKPAAKLPATPAVVTQS  
1059 RQPKLPAASSDDDWEQF  
1060 >Herbaspirillum\_hiltneri\_3 |WP\_053195617.1 methyl-accepting chemotaxis  
1061 protein [Herbaspirillum hiltneri]  
1062 MNFFANMNI SKRLNLGF AII LFS AIAVIALSIWRLHTVAETTQAMMEKPLAKERLVS DWYRTIHTSVRRTT  
1063 AIAKSADPSLSAFFAEDAATATKLSNEQQKTLEGLLSSDKEKALFAQLATVRKSYIAARDAISKAKADGNV  
1064 EEAARVLAKDFPAAAKGYLDSLQQLLDLQRSS IDDI AAGIHDHYTRSRNLLIACGALLFIAGWVFAWRLAL  
1065 SIIIRPLKQALGIAETVAAGDLSSHIDTSRKDE TGKLLLALKTMNDNLQRIVGQVRS GTDTI ATASAEIASG  
1066 NMDLSTRTEQQAGSLEETASAMEELTSTVKQ NADNARQANQLAVSASEVAVQGGSVVGVVDTMGAINASS

1067 KKIVDIIISVIDGIAFQTNILALNAAVEAARAGEQGRGFVAVVASEVRS LAQRSASAAKEIKELISDSV DKVD  
1068 SGSRLVEQAGATMAEVVASVRRVTDIVGEISSASQEQSTGIEEVNRAIAQMDESTQQNAALVEQAAAAAQS  
1069 LQDQAATLTQVVGIFTLDSGHAVGNSAALAPAKPKPAIVATGAASVKSLPRKPMPI SAKTAVSAPAATPKR  
1070 LPAAVSDDDWEQF  
1071 >Acidovorax\_sp.\_MR-S7\_1 |WP\_020226741.1 methyl-accepting chemotaxis  
1072 protein [Acidovorax sp. MR-S7]  
1073 MKNLNIGTRLGGGFALVLLMALMTAFGVWRLSAVAQATSDMTHQPLAVERMISDWYRYVYSAARRTTAIV  
1074 KSTDPSLGEFFAAETATSTRESAELQKRIEGLLQRDEEKALWAEIQKARTGYLSSRDQAVKAKTEGRSEEA  
1075 ERLLTQAYLPATEQYSALIQRLLDQMQRASIDATAQQIGATYAQSRRAWLIALGALGVALGAACAWWLTRGIT  
1076 RPLAQAVQVARAVASSDLTSRPAPRASDETGQLLQALDDMNASLSQVVARVRQGADS IATASSQIDAGNQD  
1077 LSSRTEEQASSLQQTAA SMEELTSTVRQNAENARQANQLASSASQTAAQGGQVVAGVQTMDAINASSRKI  
1078 ADIIGVIDGIAFQTNILALNAAVEAARAGEQGRGFVAVVASEVRS LAQRSASAAAKDIKGLIGDSVTKVDEGS  
1079 HQVAEAGRTMDAIVQSVQRVSDLVAEITAASQEQSAGIDQVHQAITMMDQVTQQNAALVEEATAATGALKA  
1080 QAGDLASAVSVFRIEGGQSARAAAPAPRPAPAPIAARAAPAPAPVARPAAPKALAPVKAPAAARGTDDDWE  
1081 SF  
1082 >Janthinobacterium\_sp.\_Marseille\_1 |WP\_011979309.1 methyl-accepting  
1083 chemotaxis protein [Janthinobacterium sp. Marseille]  
1084 MIFFSNMKIGARLMLGFGVVLALSIAIAADGIRQLHAVSAITRSMLELPIAKERMVSDWAAITKASIARTI  
1085 GVAKSADPALAQFSAKFAADDSKQSMEEIIQKLEPLLNTDQEKELYAKILDVRKSF LAGREGVMKLTKEGKE  
1086 AEA AKYFDTTFLPAADSFKNHFTFEFVELERKQMDAGTAQLSDVEAASTRQLMLLSAMPLAFGIFCAWRLTI  
1087 GITRPLKTAVDAARRVAGGDLTNDIKAESKDECGQLLAALKDMNDGLQRIVGEVRLGTETITTTASNEIAAG  
1088 NLDLSRTEQQASSLEETASSMEELTSTVKQNADNARQANQLAVSASEVALKGGDVVSQVVTMSSINESS  
1089 RKIVDIIISVIDGIAFQTNILALNAAVEAARAGEQGRGFVAVVATEVRS LAQRSASAAKEIKALIGDSV GKVD  
1090 TGNKLVAEAGATMDEIVNSIRRVTDIMGEITAASQEQSAGIEQINQAIQMDHVTQQNASLVEEAAAAAES  
1091 MQDQARKLGQVVGAFKLDNAQEANPPRASGVTRLAPKPAAGSAGLAVAAPLPQRRANGALPAGDEWEQF  
1092 >Albidiferax\_sp.\_OV413\_1 |WP\_092754252.1 HAMP domain-containing protein  
1093 [Albidiferax sp. OV413]  
1094 MPSFIAGLSVAKRLGLGFALVVLVSVITII FGISRLNAVAEAAQYMVASPIKTERIVSDWYRNIHTGVRRT  
1095 GAI AKSNDPAVATYFAEDQAASTKSSSEFQKQVELLMDTDVEKTLFKQISEERKNYILVRDAILD LKKEGK  
1096 AEEASQMLDQKFTPASKAYMSKMEELLNTQRKDI DDQSRTIQDSYATSRNLMVALGVVSVLLSIVIAWLLS  
1097 GTITGPLAQASVIARQVASGDLTARIDTQRSDELGQLLTS LKTMQAGLVQV VANVRSGSES VATASAQIAE  
1098 GNNDLSARTESQASALEQTAASMEELSSTVKQNADNARQANQLAMSASTVAIRGGEVVTQV VETMKGINES  
1099 SRKISDIIQVIDGIAFQTNILALNAAVEAARAGEQGRGFVAVVASEVRS LAGRSAAEAAKEIKNLIGASVDRV  
1100 AQGTALVDQAGSTMTEVVNSIRRVTDIMGEISAASNEQSLGVAQVGEAVTQMDQATQQNAALVEEMAAAA S  
1101 SLRTQAQDLVQVVAVFKLGQHDGAQGLSLGFNR  
1102 >Rhizobacter\_gummiphilus\_1 |WP\_085752380.1 HAMP domain-containing  
1103 protein [Rhizobacter gummiphilus]  
1104 MNLSIGKRLALAFGLVLLLTAMITLLGLWRLQGTSQATAEMMAEPLTKERLIGDWYRNIQTGVRRTTAIV  
1105 KSNDPALATFFAAEEKASSKASGEYQKSI EALLRTDEELALFKSISEHRKVYLSRDEISKFKKGDGVAQA  
1106 TKVFDDVFTPASNAFIADVQKLLDRQRESIDASASRIHDTNASSRNLI LALGLLAVVVGGFVAVVITRGVT  
1107 GPIASAVSAAQRVAAGDLGQSIDSTARDETGVLLRALKDMQGR LQTVLRDVRD NAEGVATASAEIASGNSD  
1108 LSARTEQQASALQETAATMEQLGITVRNNAENANHANQLAREANTLATQGGEVVGVVVRTMSDINAGSRKI  
1109 GDIIGTIDGIAFQTNILALNAAVEAARAGEQGRGFVAVVASEVRS LAQRSAAAKEIKTLINSSVEQVEQGT  
1110 ALVDQAGARMGEIVGAIQRVSDIVAEISSASAEQRSVGVGQIQAVDQMDQATQQNAALVEEGAAAAESLKH  
1111 QAARLLQTVGVFKLAAA  
1112 >Massilia\_psychrophila\_1 |WP\_099916041.1 HAMP domain-containing protein  
1113 [Massilia psychrophila]  
1114 MKNIKIGPRLGIGFALILAMTVFIAIVGVWRLNDVAASTHAMMVQPLTKERLFTDWYQGNFGAIRRTQAI I  
1115 KSADPELSAYFKEDGAATAKRVVELTKQAEPMIQGA AEKSLEYEKIMAQRKLYSAARD DALKAKAAGDNEAA  
1116 VKLLDQVYTPQAKAYQDMLQDMVTLQRGEIDATAHAIDATASLSTKLIMILTACAVAVGVGFSWLLTIGIT  
1117 RPIRQAVELAETVAGGDLTRTIVATSND ETGALLRALANMNSLVGIVTEVRTGTDSITTASNEISAGNHD  
1118 LSARTEQQASSLEETAASMEELTSTVKQNADNARQANQLSQTASDVAIQGGAVVGVIVVTMGSINESSRKI  
1119 VDIIGVIDGIAFQTNILALNAAVEAARAGEQGRGFVAVVASEVRTL AQRSASAAAKEIKTLIGNSVDQVDAGA  
1120 KLVDQAGATMEQVVASIRRVTDIMGEITIASAEQTDGIEQVNQAI AEMDQVTQQNAALVEESAAAAESMQQ  
1121 QAGRLAQVSVFKLAQA AKAEPRLRPVPASAVRAAPRTRAI AAPQPKRTARGAGSDEWEEF  
1122 >Herbaspirillum\_sp.\_meg3\_2 |WP\_094563173.1 HAMP domain-containing  
1123 protein [Herbaspirillum sp. meg3]



1124 MNIIGNMKIGKRLTLGFALILAFSIVITGIGIWRLQAVSDATRDMSQPLLKERLIGDWYANLASGIRRTI  
1125 AIAKSSDPALGPYFAAEAAAASSKSSGEYQKKVEALLETDEEKKLFQQIGEQRKIYLVSRDDINKAKAAGNI  
1126 EEAERVLEKVFVPASTAYQDTMRKLVLELQRKDIDETALHIDVIANESRVLLLVLLEGLILALGVLCAWYLTV  
1127 GITRPINTAVVLSRRVAEGDLTANVNVNSKDETGQLLQALQDMSNSLRGIVTNVRSRGTDTIATASSEIAAG  
1128 NLDLSSRTEQQASALEETASSMEELISTVKQNADNARQANQLAVSASEIATQGGGVVGVVDTMGAINSS  
1129 RKIVDIIISVIDGIAFQTNILALNAAVEAARAGEQGRGFVAVVASEVRSQAQRSAAAAAKEIKVLINDSVEKVG  
1130 NGSKLVEQAGATMQEVVDSVKRVTDIVGEISSASQEQTMGIEQINHAITQMDQVTQQNAALVEEAAAAAAS  
1131 MQTQADSLAQLVSVFTISAINGNPALPQARRTIDITPKEPRLS  
1132 >Brenneria\_sp.\_EniD312\_1 |WP\_009112183.1 methyl-accepting chemotaxis  
1133 protein [Brenneria sp. EniD312]  
1134 MKNYKIGIRLGVGFGVLIVFSLVMLACGIYQLHQIDQRTROMMQEPLOKERLVTDWYGVISASVQRTTAIA  
1135 RSSDDALSELFAAENAVASTGSSERQAEFAGRIAGPQEKALFDKLNQVRSYIKVRDLIITVKSSGQLEQA  
1136 LTLFEQDFRPAARNYLDLTLQALRDFQRASIDQLGSDISRGASNGYLFLGIIGLLIAVAGSLLAWVLTRSIV  
1137 RPLEHAVRITNAVADGDLTQEVPRPEGRDETAALLHALRNMTVRLRTIVGEVVRQGAASIAGASSQISAGNLD  
1138 LSSRTEEQSSALQETAATAIEQLASTVQRNADNAKQANQMAQSTAGQAQSGGQLVSEVVQTMGAIDTSSKKI  
1139 VDIIGVIDSIAFQTNILALNAAVEAARAGEQGRGFVAVVASEVRSQAQRSASAAAKEIKELIDHSVQTVESGN  
1140 RLVEQAGSSILEIVGGVRKVSVDLVEISAASQEQSLGIDQVNVAVTQMEQTTLQNAALVNEAAAATQSLQQ  
1141 QAEQLERGVSVFRLTGEQQISGGSSAAGKPASAATAPSVALEHKPATVGGKSAASGEGNWTTF  
1142 >Collimonas\_sp.\_OK607\_1 |WP\_092438538.1 HAMP domain-containing protein  
1143 [Collimonas sp. OK607]  
1144 MKIANLKVGTMRGIGFAIVLALSVMSTVIGISNLRQVAMATEQMMEKPLVKERLVSDWGVLTTSIAIVRTSF  
1145 IVKSTDGSLATTFEAEDIDASVKKGSELQKTLPLLTSDAEKELYKSIKVLREKYQQSKVLAMKAKQDNGE  
1146 ESSRIYNDVFLPDSKNYKQQLDELLESLQRKSIDQGTREVAQLYDRSFNLMVLLGVLMIALGAVCAFLISRS  
1147 ITRPLGEAIKVAQTVASGDLSSHIEVKTDDTETGQLMQALKDMNDSLLTVVGDVVRTGTDTIATASSQIASGN  
1148 QDLSARTEQQASSLEETAASMEQLTSTVKQNADNARQANQLAVSASGVAIKGGGVVSQVVTMGSINTSAK  
1149 KIVDIIIGVIDSIAFQTNILALNAAVEAARAGEQGRGFVAVVASEVRSQAQRSAAAAAKEIKTLIGDSVEKVDV  
1150 GVKLVQAGTTMGEIVDSVKRVTDIMSEIAAASEEQTAGIEQVNRQAQMMDQVTQQNAALVEEAAAAAASL  
1151 QDQANLVNVVSVFNTGEMSMGSAPLKTISSSPAATAASRIAIAPRNIRQSAATNVKPLKRVTKVAAVA  
1152 TAADGEWATF  
1153 >Acidovorax\_sp.\_62\_1 |WP\_099742278.1 HAMP domain-containing protein  
1154 [Acidovorax sp. 62]  
1155 MHIHLSIGSRLALAFSAVIFLTAAILGIGIWQLQAIASETDMAMERPLTKERLVSDWYRTIHTSVRRTTA  
1156 VAKSSDPSLATFFAPENAEASRNSTEQKQIEALLETPEEKALFATLSQARQRYIAERDAVNKAKADGQAE  
1157 EAEKRFNSDFRPAAGAYLDSLQALLDQQRSTSINTAAANVQSGYTRGRVLMIGLALALLTATALAYIITRS  
1158 ITRPLHRAVVVAQTVASGDLSTQAGAAASARDETGQLLRALDAMSEQLRSTVGVQVRQGAETIALASSEIAR  
1159 GNLDLSSRTEEQASALQETAASMEQMTATVQRNADNARQANQLAQDASSLAQRGGTVVGNVSTMGGIHTA  
1160 SRKIVDIIISVIDGIAFQTNILALNAAVEAARAGEQGRGFVAVVAGEVRTLAQRSAAAAAKEIKGLIDDSVQVQV  
1161 DAGNRLVEEAGTVIRDVSVGVQVRVTHIVGEISAASQEQTGGLQVNRRAIAQMDQVTQQNAALVEEAAAATG  
1162 SLESQATQLVQAVAVFSLGNADTGRQLRHPGAALSIAA  
1163 >Oryzisolibacter\_propanilivorax\_1 |WP\_091566973.1 HAMP domain-  
1164 containing protein [Oryzisolibacter propanilivorax]  
1165 MKNLSIGTRLAAGFALVLLLMACISGFGVWRLQTVASAQMTQQPLAMERMISDWFYVSAARRTSAIV  
1166 KSSDPSLVEFFKADTAMTTSKAAELQKRIEALLDSPEEKALWSDIQQARTQYLNARDQAVQAKAEGRTDEA  
1167 ERLLQTVQPATAYIDQIQRLLDLQRARIDATAQGIQATYEEESRWLLALGLLALAAGALCAWRLTRGIT  
1168 RPLAQAVQVARAVAANDLTTQVQVHGSDETGQLLQALHDMNASLTRVVAQVVRTGAEGIATASSQIDAGNQD  
1169 LSARTEEQASSLQOTAASMEQLTGTVQRNADNARQANQLAASAAQTAAQGGQVVAGVVQTMGAIHDSRRM  
1170 ADIIGVIDSIAFQTNILALNAAVEAARAGEQGRGFVAVVASEVRSQAQRSAAAAAKDIKTLIDDSVAQVQVQV  
1171 QVQVDEAGRTMQTIVSNVQVRVSDLVAEITAASQEQSSGIDQVHQAVTQMDQVTQQNAALVEEAAAATGALKA  
1172 QAGQLAAAVSVFRIEGGQAPAAAAAMAATMPAAPRRQPATAPRPAPAPKAPVASAARPLLSPTSAPAAAASA  
1173 RRNDDWESF  
1174 >Paraburkholderia\_nodosa\_1 |WP\_081772006.1 HAMP domain-containing  
1175 protein [Paraburkholderia nodosa]  
1176 MDVPSPCVCIFQKKREYVVTFRNLSIGHRLGLGFALVLLALTVSTGVGIYRLQTVADATHTLMSVPLAKER  
1177 MISDWQRYLYGGIRRTTAAIAKSSDASLAGFFAADADSSTKKSLLVVKKIEELADSEEEKALLENINHIRTV  
1178 FTDARDQVSAAKKAGDQDTAKRSLEEDYLPAAQAYEDAVQKLLDHQRHAIDMAAQHVDEIASTSRALILL  
1179 AILAIGLVVCAWLLTKSITLVPVGRAVAAARRIADGDLSDGGALVRNGERTRDEAAILLDALRLMNNENLAH  
1180 IVSQVRGGTDAIASASTEIAAGNHDLSTARTEQAASLEETAASMESELTATIRQNLNENARQADQIGTHAVGT

1181 VEKGSTAVEHLVATVVKISDSSARIADIITLIEGIAFQTNILALNAAVEAARAGEQGRGFVAVASEVRS  
1182 QRSSAAAKEIKELIEASVESVREGVQRADEVGQNMVAVKRAIRRVADLVAEITAASEEQTRGVEQVDAAVS  
1183 QMDQVTQQNAALVEQAAAAAQSMDDQAGQLKASVAVFKLADVCAYPVS  
1184 >Herbaspirillum\_sp.\_YR522\_2 |WP\_008115731.1 methyl-accepting chemotaxis  
1185 protein [Herbaspirillum sp. YR522]  
1186 MNFIGNMKIGKRLTLGFAVILAFSVVIAGIGVWRLLENVSTATREMMSAPLMTERLLSDWYTNLATGIRRTI  
1187 AIAKSTDPALGPYFAEAAAASSKSSGDYQKKVEALMSSPEELALFAKIGDLRKYVLSRDEINKAKAAGNN  
1188 EEVERLLDKVFPAAATAYQDAMRALVELQRTEIDATARQIDATAANSRLLIIVLEGLILLGLVLSARYLTL  
1189 GITRPLDITAVGISQ RVAQGDLSGEVAVRSRDETGQLLHSLNAMNSNLRGIVSNVRSRGTDTITTASAEIAAG  
1190 NLDLSSRTEQQASSLEETASAMEELISTVQRNADNARQASQLAVSASEVAEQGGVVSQVVQTMGSINDSS  
1191 KKIVDIISVIDGIAFQTNILALNAAVEAARAGEQGRGFVAVASEVRS LAQRSASAAKEIKQLINDSVSKVD  
1192 DGSRLVEQAGATMHEVVTSVRRVTDIVAEISAASAEQTSGIEQINHAITQMDQVTQQNAALVEQAAAAAS  
1193 MQNQADGLARLVSVSFDGSAPVALTRAPVDVTPRVRLPGA  
1194 >Pusillimonas\_sp.\_JR1/69-3-13\_1 |WP\_102074282.1 hypothetical protein  
1195 [Pusillimonas sp. JR1/69-3-13]  
1196 MNMFTNMRI GNRLGLGFAVIVVLTIVITSIGVWRLYTISQTTTRYLMTVPLAKERMISDWYRHLTNGINRSM  
1197 AIAKSTDPALGPYFAEAAEQTKAATQASTELQNKIVPLLVADDEKELFKLIMEHRQVYLSTRDAMTKRKVAGDT  
1198 EEATRIFITQQFIPGATTYQASVEKLVLEQRVFMQKGAETAEANASSRRTLIALAVIVALFSVIFYAWKLTT  
1199 GITRPLRRAVDAARNVAGGDLGKINHVSTDETGQLLQSLKDMTANLLTLVGNVNRNGTHSIATASSEIASG  
1200 NLDLSSRTEEQASSLTETATAMEELTNTVKQTADNAQQANQLAQATSTIAIKGGS AVSEVVSTMG SINESA  
1201 RKIVDIIGVIDGIAFQTNILALNAAVEAARAGEQGGGFVAVATEVRS LAQRSATAAKEIKLLINDAVEKID  
1202 TGGRLVQEAGSTIDEVVVSVKRVTDIVGEISMASNEQSIGIEQVNQITILQMDQVTQQNAALVEQAAAATGS  
1203 MQEQADQLTRAVSVFNLGNHTERAPASRQIASTTQETVKGKALSRLKALGTA  
1204 >Achromobacter\_piechaudii\_1 |WP\_006217855.1 methyl-accepting chemotaxis  
1205 protein [Achromobacter piechaudii]  
1206 MKNMKGTRLAGGFSVLLAMIIVMCIVGLVSLANINESVETVTQSRSLIKERLISDWGRNIQTGVTRTTAIA  
1207 KSADASLAGFFTEEAASSTRNSSALQQQIEPLIETDEEKQLWEGIRKSRGDYLRTRDAIFKAKQDGNVDAA  
1208 NRVFTQEFLPATRFIDQINKLSNLQRADIDARAADIQSAYGAANLWMIVIGSIALITGLVLAVLLTRSIT  
1209 RPLADAVRVARTVAANDLTSTITVQSRDEIGQLMQALESMNTNLAATIASIRTGVDSMASASGEIAAGNTD  
1210 LSSRTEQQAASLEETAASMEELSSTVKQNADNARQANQLAAAASDTASRGGATVSEVVSTMSAISSSVKI  
1211 ADIVSVIDGIAFQTNILALNAAVEAARAGEQGGGFVAVAAEVRTLAQRSQAQAAKEIKTLIEDTVQKISQGS  
1212 ISAERAGTTMQEIVSSVQRVSVSTSLCFGLISRSSATSSSAASACCSRSISACVRARFAACARSTSVHVS  
1213 ARAAMIAFQKQSKSRNRMTGGLSGPRAAFWCAWTA AAAESERLRFVTFIMRNIWT  
1214 >Variovorax\_sp.\_YR216\_1 |WP\_093165211.1 HAMP domain-containing protein  
1215 [Variovorax sp. YR216]  
1216 MKNWKIGARLVGFGFLV LAMVLTALGIWRLETTAAAEETHQPLAKERIISDWYRLVEIGVRRTTAIA  
1217 KSSDPSLGPYFAEESANSTKAAQAMQKQLEPLLTSEDEKALWKDFQEVTRYLEARDVVVKTKAEGKQEEA  
1218 NAALEKQFIPVANTYLG NVQRLLDMQRRADIGTVVQLGASYRTSRDLLLALGA AVLCLGGFFAWRLSTGIT  
1219 RPLRRAVTAAQAVASGDL SIKIEADSRDETGQLLLALNDMNASLIQIVGEVRTGTDTIATASGQIATGNQD  
1220 LSSRTEQQASSLEQTAASMEELTGTVKQNADNARQANQLALSASQVAIRGGSVVG EVVGTMD SINSSRKV  
1221 VDIIGVIDGIAFQTNILALNAAVEAARAGEQGRGFVAVASEVRNLAQRSASAAAKEIKTLIGDSVERVEEGT  
1222 RQVAEAGRTMEEIVESVKRVTDIMGEIAAASQEQTSGIEQINQAITQMDQVTQQNAALVEQASAAAGSLQD  
1223 QASQLSRAVGVFKLQR  
1224 >Janthinobacterium\_agaricidamnosum\_1 |WP\_038491312.1 methyl-accepting  
1225 chemotaxis protein [Janthinobacterium agaricidamnosum]  
1226 MSFLRNISIGLRLGVGFAVILALSMLITGISVWRLHDVAAATHAMMEQPLAKERHISDWLTKIESGVRRTT  
1227 VIVRSDTALAAIFADDARQSSVISGELQKKIEALISGPEEMEMFRLIGLQRQVYLDARALVSKLKSEGRK  
1228 EEADHAFSTVFEPGA AKFQRVIQDLLDRQRKSIDNTAHDIDSVAVTSRNL LGLAVLVLGFGVSWGLLTV  
1229 GIVRPLRTAVDVARRVAAGDLTADIDASAKDETGQLLLALKDMNASLLNIVSEVRSGTENIATSSSQIAAG  
1230 NQDLSRTEQQAGSLEETASSMEQLTTTVKHNADHARQANQLAASAAQVALKGGTVVAQVVGTMMDTINSSS  
1231 NKIVEIISVIDGIAFQTNILALNAAVEAARAGEQGRGFVAVASEVRNLAQRSASAAAKEIKTLIGDSVEQVK  
1232 QGSQVLSQAGATMHDIVASVQRVSDIITEITAAGHEQSAGIDEIYQAIGQMDKVTQQNAALVEQSA AAAEA  
1233 MQQQAQSLAQVVSFVFLNQHAGTGLSALPAPRRVLR IAHG  
1234 >Hylemonella\_gracilis\_1 |WP\_035608590.1 methyl-accepting chemotaxis  
1235 protein [Hylemonella gracilis]  
1236 MNNLRIGTRLAAGFGLLIVFSLIMLVSGIYQLRHSADATRQMMQEPLQKERLVSDWYTGISASVQRATAVA  
1237 RSSDNALTELF AAANAASSKEISERQAQFAKLISTPQEQAMFDKLTEHRQAYIKARDAI IAAKAGGQLEEA

1238 KRLFEQTFLLPASRDYLGSLQGLRDHQRASIDRMGMDIDRSAARGYMLLGAIGLTIAAAGALIAWTLTRSIV  
1239 QPLTKSVEAAQAVASGDLTREPRAEGRDEAAQLLRALQDMTQRLRGIVGDVQLQGSQAIASSATQIAAGNLD  
1240 LSSRTEEQANSLQETAASMEEITSTVRHNADNARQANQLAQETANQATRSQVADQVVATMGGIHEASRI  
1241 VDIIGVIDGIAFQTNILALNAAVEAARAGEQGRGFVAVVASEVRSQAQSAEAAKEIKGLIGDVTNKKVDAGT  
1242 QLVEQAGASIRDVVTSVQRVRDIVAEISAATQEQTAGLELVNQAMTQMDLVTQQNAALVEESTAATQSLET  
1243 QASQLARTIGVFRVNAAPFSTPSPYARKETAIAPPTQPRAKVPTTAAAKSAQITPPRGRAQASRAAAPRL  
1244 TQRLHTPAATPAALTGQQGSTPTSGDDWETF  
1245 >Rhodoferax\_antarcticus\_1 |WP\_075586367.1 HAMP domain-containing  
1246 protein [Rhodoferax antarcticus]  
1247 MKHLTSLSIGQRLAAGFALILLLAMVITGIGLWRLQETARETEAMMGAPLTKERLASDWATYVNAAVRRTSA  
1248 IAKSTDSSLVDFFAADMTATGKGASEAQKAI GELLEETSEEKAQFEELATIRKKYQSRDSITELKKVSKLD  
1249 EANEVLNKEYMPQATAYLSGLDAFKQLQRQAI DTRAAEIKSLNQTSSKLLLVLSVVMLLMGTTIAWLITRA  
1250 ITTPLRDAMTAARRVASGDL SHIMTVHTRDETGVLLQCLQEMQSQLGSVVANVRGNAESLATACAEIAQGN  
1251 QDLSSRTEQASALEETAAMEELSSTVKQNADNARQANQLAQNASAVAVKGGEVVAQVVNTMKGINESSR  
1252 KISDIISVIDGIAFQTNILALNAAVEAARAGEQGRGFVAVVASEVRSLAGRSAAEAAKEIKTLISTSVERVEQ  
1253 GTTLVDQAGTTMTEVVGSI RRVNDIMGEISSASTEQSQGVGQIGEAIQQMDQVTQQNAALVEEMAAAASSL  
1254 RSQAQELVSTVAVFKLAPGQELDF SAPAARASAVVSAPKAFAPAQKVMKAATK PANLLHDSTVKAGNDDW  
1255 ESF  
1256 >Delftia\_acidovorans\_1 |WP\_034393844.1 methyl-accepting chemotaxis  
1257 protein [Delftia acidovorans]  
1258 MKNLRIGLRLGGGFTILLIIMLLISVTSIVSMGHMARSTTEITEVALAKERMISDWFRNIHSGSRRTTAIA  
1259 KSSDPSLATFFAEDAAESSRQSSKLDRIEPLLQTQEEKDIWVEIKKARAGYLAGRDVVTKAKAEGRAEDA  
1260 ERLFTQEYQPATQRYIEIVQRLLDMQRAAIDSSAAEVQVRFASRATIIAVVSLAVVLGALA AWWITRGIT  
1261 VPLAEALRVARTVANNDLTSRITVDSRDETGQLLQALRQMNDNLAQVVGQVRS GADSIATASGEIDAGNQD  
1262 LSSRTEQQASSLEQTAAMEELTSTVKQNAENARQANQLAASASQTAVQGGKVVAGVVDTMGGI SESSRKI  
1263 ADIIGVIDSIAFQTNILALNAAVEAARAGEQGRGFVAVVAGEVRLAQRSASAAKDIKDLIADSVSKVDAGT  
1264 RQVAEAGRTMDGIVQSVQVSDLVAEITAASQEQSSGINQVHQAI SQMDTVTQQNAALVEEAAAATGSLKS  
1265 QVNQLAAAVSVFRIDGLAPARAGTGAASSSVPAARAPSAAAPMRPAARPLAASAPAAGTAPAAAGTAPAAAA  
1266 RSASAAPAPAACLPAARQTVAAKGNDDGDWTSF  
1267 >Burkholderia\_sp.\_AU16741\_1 |WP\_089471075.1 HAMP domain-containing  
1268 protein [Burkholderia sp. AU16741]  
1269 MLTVISKLNIGKRLGLGFAMVLAAMSLIGIVIGLARLSSVAQATRDMVARPLQTERLVNDWSRQISVAVTRT  
1270 TAIKASADPGLANYFNDEAIAASKVSAAKQTAIEALMTSDAEKRLF AAI GEQRKRFLAIRDQIYALKKEGQ  
1271 AEQADQLLEQQFIPTARQLVEKVDALVKYQREEIDGLAAEIDANYRFGRTLMI AFGMVGMLLSVVCGWLIT  
1272 RSITRPLMRATDV AHRVARGDLSVRVDVHGTDELGQLLGLSLRDMQAALLRVVSNVRRGSDNLAASAEIAQ  
1273 GNDDLSSRTEQASALEQTAASMEELSSTVARNADNAHEANQLAMNASTVTAQCGEVINQVETMKGINDS  
1274 SRQISDITGVIDSIAFQTNILALNAAVEAARAGEQGRGFVAVVASEVRSLAGRSADAAREIKKLIGSSVGRV  
1275 AQGSTEVERAWVAMTEVVNSIRRV TETMSEISAASTEQSLGVAQIGEA VGMERTTQQNAALVEQTAAAAI  
1276 NLRQQSRELVEVSVFQLGRAEAL  
1277 >Delftia\_sp.\_HK171\_1 |WP\_071955969.1 HAMP domain-containing protein  
1278 [Delftia sp. HK171]  
1279 MKNLRIGLRLGGGFTILLIIMLLISVTSIVSMGHMARSTTEITEVALAKERMISDWFRNIHSGSRRTTAIA  
1280 KSSDPSLATFFAEDAAESSRQSGKLDRIEPLLQTQEEKDIWVEIKKARAGYLAGRDVVTKAKAEGRAEDA  
1281 ERLFTQEYQPATQRYIEIVQRLLDMQRAAIDSSAGEVQVRFASRATIIAVVSLAVVLGALA AWWITRGIT  
1282 GPLAEALRVARTVANNDLTSRITVDSRDETGQLLQALRQMNDNLAQVVGQVRS GADSIATASGEIDAGNQD  
1283 LSSRTEQQASSLEQTAAMEELTSTVKQNAENARQANQLAASASQTAVQGGKVVAGVVDTMGGI SESSRKI  
1284 ADIIGVIDSIAFQTNILALNAAVEAARAGEQGRGFVAVVAGEVRLAQRSASAAKDIKDLIADSVSKVDAGT  
1285 RQVAEAGRTMDGIVQSVQVSDLVAEITAASQEQSSGINQVHQAI SQMDTVTQQNAALVEEAAAATGSLKS  
1286 QVNQLAAAVSVFRIDGVAPARAGAASSSVPAARAPSAAAPMRPAARPLAASAPAAGTAPAAA PRSASAAPA  
1287 PAAKLPAARQTVAAKGNDDGDWTSF  
1288 >Paraburkholderia\_aspalathi\_1 |WP\_093637546.1 HAMP domain-containing  
1289 protein [Paraburkholderia aspalathi]  
1290 MPTFISNLP IAKRLGAGFVLV LIMSISIVIGLARLSSVAQATRNLVANPIQTERLVNDWSRNI STAVTRT  
1291 TAIKASADPGLASYFVEEAVASSKVS GALQKSIEALMTSDEEKSLFAAI GEQRKAFIATRDQIYALKKSGK  
1292 AEEANQLLEQQFIPASRLFVAKVDALVKQQRDEIDRVATQIEANYEYSRTLMI ALGVVSLLLSVVCAWLIS  
1293 GSITRPLVKATGVARQVAEGDLTARIDNHSTDEVGQLLTSLRDMQTS LVRVSNVRRGSGESVATASAEIAQ  
1294 GNDDL SARTESQASALEETAASMEELSSTVQRNADNARQANQLAMNTSEVAIQCGEVNQVETMKGINDS

1295 SRKIADIIGVIDGIAFQTNILALNAAVESARAGEQGRGFVAVNEVRSLAARSADAAKEIKKLISASVERV  
1296 AOGSAQVEQAGVAMTEVVRSIRRVTDTMGEISAASNEQSLGVAQVGEAVTQMDETTQNAALVEQMTAAAN  
1297 SLRNQSHLVQVVSIFKLDGGASLMSLG  
1298 >Rhizobacter\_1 |WP\_056802308.1 MULTISPECIES: methyl-accepting  
1299 chemotaxis protein [Rhizobacter]  
1300 MKLNDVRVGARLGGGFAVTLALLCLIMVVGWVRLGSLAQATQQMMAEPLAKERLAAEWARNVVSIGVTRGKA  
1301 IAKSPDATLEGLFSDDAKASTARANEITQALKAFPTSPDEQVLLDRIAETRKYTLVARDGMATAAKRAGNTE  
1302 EATRIYDSSFQVVPVYVAVVMQAYVDYQKKAIDEMAKRIDADALRGRLIGVGTGLALVFGAVFALLTRS  
1303 ITVPVAEAARLADAVAGGDLRRVTAKGRDEIAGLMRSLGKMNASLHDMVTQVRQSADSIQVASGEVATGN  
1304 QDLSARTEQTASNLOQTASSMGLTGTVKQTADSARTANQLASSAQGAAGKGGEVVSVVSTMNDIHASSK  
1305 KIADIIGVIDGIAFQTNILALNAAVEAARAGEQGRGFVAVSEVRSLAQRSAQAAKEIKSLIDASVDKVDL  
1306 GSRLVADAGQSMTEIVNSVRRVTDIIGEITSAASEQSDGIGQVNTAVTQLDQMTQNAALVEQSAAAAESL  
1307 KEQALRLSGVSVFRLTA  
1308 >Bordetella\_genomosp.\_5\_1 |WP\_094857089.1 HAMP domain-containing  
1309 protein [Bordetella genomosp. 5]  
1310 MKNLKLGTRLAAGFAVLLAMMIVMCVGLYSLADINRAVDNVTHQSLTKDRMVNDWSRFIHTGVTRTTAIA  
1311 KSSDPSLAGFFTQDAAASTAQASKLQQQIEPLIQGDAEKQVWAGIGKARTEYLSSRDRIFKAKQEGNVELA  
1312 ERIFTQEYLSASRRFIDLITQLSDMQRADIDAQAVSIESSYNVANLWMIVLGAIIVLSGLALSILLTRSIT  
1313 RPLADAVRVARTVADNDLTSRITATSKDEIGELMHAE SMNNNLALT VTRIRAGVENIASASGQIAAGNTD  
1314 LSSRTEQQAASLEETAASMEELSSTVKQNAESARQANQLAAAASDTASRGGSTVSEVVSTMSAIISSSVKI  
1315 ADIVSVIDGIAFQTNILALNAAVEAARAGEQGGGFVAVAAEVRTLAQRSAQAAKEIKTLIEDTVQKIQGGS  
1316 DSAARAGATMQEIVSSVQRVTDIMGEIAAASAEQADGIEQVNRVAQMDEVTQNAALVEEAAAAAGSMQD  
1317 QAADLRGAVSAFKLQAGQQAQDARAAAPRLSGAPLQLAAY  
1318 >Herbaspirillum\_sp.\_RV1423\_4 |WP\_034294266.1 methyl-accepting  
1319 chemotaxis protein [Herbaspirillum sp. RV1423]  
1320 MNFFANLNISKRLNLGFAILFSAIGVIALSIWRLHIVAETTQDMMQKPLAKERLVSDWYRTIHTSVRRTT  
1321 AIAKSADPSSLAFFADDAATATKLSNEQQKALEGLSSDKEKTLFSQLTVVRKSYIAARDAISKAKADGQV  
1322 EEANRILEKDFPAAAKGYLDLLQQLLDLQRSSIDEIAASIHDLTYQSRNLLVAFVGLLFFVAGWLFARLAL  
1323 SITRPLNQAVDIAETVAAGDLTSRIDTRRKDETGKLLLALKTMNDNLLRIVGQVRSGTDTIATASAEIATG  
1324 NLDLSSRTEQQAGSLEETASAMEELTSTVRQADNARQANQLAVSASEVAIQGGAVVQVVDTMGAINASS  
1325 KKIVDIIISVIDGIAFQTNILALNAAVEAARAGEQGRGFVAVSEVRSLAQRSASAAKEIKGLIDDSVEKVG  
1326 SGSKLVQEAGQTMTEVVASVKRVTDIVGEISSASQEQSEGIEQVNQAIQMDETTQNAALVEQAAAAAQS  
1327 LQDQAATLTEVVGIFKLDHAATGTSVARVAPKAASAPRPLVAVAMPASPAPTVPKPVAPSPAPSRMPRI PA  
1328 STSDDDWEQF  
1329 >Acidovorax\_valerianellae\_1 |WP\_092745165.1 HAMP domain-containing  
1330 protein [Acidovorax valerianellae]  
1331 MNLQNISIGKRLGLAFGLVILFIVTMLGVGTWKLQSVAEETASMMALPLTKERLISDWYRTIFSNVRRHSV  
1332 VARSTDSTLAQQFAADNAAASKMSSEQSQSLKLISSPQEQALFDKTGEERKRFVTARDAIYKAKAEGRSE  
1333 DAERILNADFTPAGEQYLQALQALLDFQRAQINESSEAVQANYQSGRLQLIVLGALATVIALTLVAITRS  
1334 ITHPLHDAVTMAKT VATGDLTITSGSTAQDETGQLLRTLNAMGEQLRATVGVQRHGAEGIAVASSEIARGN  
1335 LDLSSRTEEQASALQQTAAASMEQMTATVRQADNARTANQLAQATSDKAVRGGEVSVNVSTMGEIHAASR  
1336 KIVDIIIGVIDGIAFQTNILALNAAVEAARAGEQGRGFVAVSEVRMLAQRSAEAAKEIKGLIDDSVQRVDS  
1337 GNKLVEQAGEAMREVVDGVRVTDIVGEISVASQEQTTGLEQVNQAIQMDTQNAALVEEAAAATGSL  
1338 ESQTAQLVRAVAVFRVGNAAQAGGAPALAAARHMPAIAAG  
1339 >Rhodoferax\_saidenbachensis\_2 |WP\_076069470.1 HAMP domain-containing  
1340 protein [Rhodoferax saidenbachensis]  
1341 MAFFFNNSVSGKRLGAFAFVLLALSIVVILVLSRLSVAADASREMIASPIKTERIIGDWYRNIYAGIRRT  
1342 SAIARSSDPSLAFFAEDQAASTKSSTEYQKMLEELMETDKEKALYAAVGEQRKAYIQVRDAVVNLKKEGK  
1343 AEESLKLMEEFVYPAGKVYQAKMEELLTMQRQEIDEIGKSIDEIYKSSRTLMIALGVVSVLLGLTVAWLLS  
1344 NSITRPLNQASAVARQVAEGDLTTHIDNQRTEVGVQLSSQLQMDQTSLVKVVSNVRSSESATASAEIAQ  
1345 GNNDLSARTEQQAASALEETAASMEELGSTVKQNAESARQANQLAMNASTVAIKGGEVVGVVETMKGINES  
1346 SRKISDIIISVIDGIAFQTNILALNAAVEAARAGEQGRGFVAVSEVRSLAGRSAAEAAKEIKSLIGASVERV  
1347 EQGTALVDQAGTTMTEVVSSI KRVTDIMGEISAASNEQASGVAQVGEAVTQMDQATQNAALVEEMAAAAS  
1348 SLKSQANELVQVAVFKLGAADQTVTRSPSPVHVKAAPVKVAARSAPAAAGAKASVKAMPKVPKAAATK  
1349 VASLSAPKASAKVTPAGGDDDWETF  
1350 >Achromobacter\_sp.\_Root83\_1 |WP\_057287277.1 methyl-accepting chemotaxis  
1351 protein [Achromobacter sp. Root83]

1352 MKNMKLGTRLAGGFVLLAMIMVMCIVGLVSLANIHESVETVTQSRSLTKERLINDWARNIQTGVTRTTAIA  
1353 KSADAGLAGFFSEEAATSSRNSSALQOKIEPLIQTDEEKQLWDGVGKSRAAYLSTRDRIFKAKTDGDVETA  
1354 NKVFSQEFLPATRQFIDQITRLSSLQRADIDARAAEIEDAYRSANFWMIAIGSIAVVSGLLLAVLLTRGIT  
1355 RPLSEAVRVARTVAANDLSSTIVATSRDEIGQLMRALESNMNANLAGTVARIRTGVDSIASASGEIAAGNTD  
1356 LSSRTEQQAASLEETAASMEQLSSTVKQNADSAKQANQLAAAASDTASRGGATVSEVSTMSAIAASSVKI  
1357 SDIVSVIDGIAFQTNILALNAAVEAARAGEQGGKGFVVAEVRTLAQRSAAAKEIKILIEDTVQKISQGS  
1358 GSAERAGSTMQEILSSVQVRVTDIMGEIAAASAEQADGIEQVNRVAVSQMDEVTTQNAALVEEAAAAAGSMQD  
1359 QAAELTRAVSAFKLPGGGQGAIPAAAPRSSAALRLAAY  
1360 >Massilia\_alkalitolerans\_2 |WP\_084416306.1 HAMP domain-containing  
1361 protein [Massilia alkalitolerans]  
1362 MRTFNNLGIGIRLTVGFTLTLVMAVLIAGSGMWRLEQVSSAARDTLAAPTAKERLIAEWYTOIFAARRTA  
1363 AIVKSSDPSLTAYFKEDAATAKTSADLVKQIEPLIAGEQESALFKRITEQRKLYGAARDNAVKAKEGNQ  
1364 ELADQILEQSFTPAAKAYQESINELVAMQRDHITATAAGIDATATRGQMI IAGLTAGAVLLGALFSWMLTR  
1365 GITRPIRAAVQAAETVAGGDLSSRIDADTNDDETGALLRALGHMNDSLVKIVSEVRSGTDTIATASGEISAG  
1366 SLDLLSSRTEQQAASLEETAASMEELTGTVRQNADNARQANQLAITASKVALDAGSVVDQVITTMGSINDSS  
1367 KKIVDIIIGVIDGIAFQTNILALNAAVEAARAGEQGRGFVAVSEVRTLAQRSAAAAKEIKTLIGASVEKVE  
1368 AGTRLVDQGTMEQVVTSIRRVTDIMAEIASASQEQIHGIEQVNOAIGLMDESTQNAALVEESAAAAGA  
1369 LQDQAARLAGMVNVFRLEAQASTPATPAPRSLAGGAGIGKLLIS  
1370 >Delftia\_tsuruhatensis\_3 |WP\_047328078.1 methyl-accepting chemotaxis  
1371 protein [Delftia tsuruhatensis]  
1372 MKNLRIGLRLGGGFTILLIIMLLISVTSIVSMGHMARSTTEITEVALAKERMISDWFRNIHSGSRRTTAIA  
1373 KSSDPSLATFFAEDAAESSRQSSKLQDRIEPLLQTQEEKDIWVEIKKARAGYLAGRDVVTAKAEGRAEDA  
1374 ERLFTQQYQPATQRYIDMVQRLLDMQRAAIDSSAADVLVRFASRAAIIITVVS LAFVLGALAAWWITRGIT  
1375 RPLAEALRVARTVANNDLTSRITVDSRDETGQLLQALRQMNDNLAQVVGQVRSAGDSIATASGEIDAGNQD  
1376 LSSRTEQQAASSLEQTAAMEELTSTVKQNAENARQANQLAASASQTAVQGGKVVAGVVDTMGGISESSRKI  
1377 ADIIGVIDSIAFQTNILALNAAVEAARAGEQGRGFVAVSEVRALAQRSASAADIKDLIADSVSKVEAGT  
1378 RQVAEAGRTMDGIVQSVQVSDLVAEITAASQEQSSGINQVHQAI SQMDTVTQNAALVEEAAAATGSLKS  
1379 QVHQLAAAVSVFRIEGVASARPAVPAPAPAGRAQPAQAQMRAPARPLAAPAAAASPGAPAAKPAKPLPAS  
1380 RQSVPATGKDDGDWTSF  
1381 >Curvibacter\_gracilis\_1 |WP\_027477789.1 methyl-accepting chemotaxis  
1382 protein [Curvibacter gracilis]  
1383 MSIFQHLSVAKRLAVGFVVLILLSIAVIGLSIYRLSALADADEMVKIPIKAERLVS DWSRNLHVGITRRTA  
1384 AVARSSDPALATFFAEDAKASSTRSGELQKAVEAMLVRDSDKAI FREIGELRSLYLKNRDGVVALKKEGKT  
1385 DEANVLEKQFLPDAKRYAGKMDLELLLTQREQVDLLSQAIEANRQSSRQFLIVLGVLSLALGTVVCWLLAQ  
1386 SVTVPLKQASQLARRVADGDLAAEVPAGHTDELGELMDALALMQGNLAKVVQNVRESSDQVSSASEEIAQG  
1387 NHDLSARTEHQASSLEQTAASMEELSSTVRLNADNARQANQMAMAASEIASKGGEVVGQVVDTMKGIQDAS  
1388 RKISEIISVIDSIAFQTNILALNAAVEAARAGEQGRGFVAVSEVRSLASRSADAAKEIKTLINASVERVE  
1389 QGTVQVDQAGETMNEVVSSIRRVTDIMGEISAASQEQTAGVAQVGEAVTSIDEATQNAALVEEMAAAASS  
1390 LRNQAHDLVQAVSVFRLSAHEQSGGARVSREAAGVRQPAVRKPVARAHSAGSLQAKAQSSPLPKAASLKIA  
1391 SAPATSTNKAERDDNWESF  
1392 >Rhodoferrax\_sp.\_DCY110\_1 |WP\_076197176.1 HAMP domain-containing protein  
1393 [Rhodoferrax sp. DCY110]  
1394 MPSFSLNLSVAKRLGLGFALLLALSMAVILVGISRLNDVAARAQEMVASPIKTERLVSDWYRNIYTGVRRT  
1395 GAIKSNPDSLQVFFAEDQAASKASSEYQKAVEPMMETEKEKALFAQIGEERKNYILVRDAVVATRAQ GK  
1396 AEEANQMLDQKFPVASKTYMGKMEELLNFRQREIDDSARRIEASYAASRNLMILLGIVSLLLSAVIAWLLS  
1397 GSITRPLAEASAMAKRVAAGDLTGRIENNRTDELGQLLTSLODMQASLVGVVSNVRSSESVATASQISQ  
1398 GNNDLSARTESQASALQQTAAASMEELSSTVQRNADNARQANQLAMSASTVAIQGGEVVGQVVTMKGINDS  
1399 SKKISDIIISVIDGIAFQTNILALNAAVEAARAGEQGRGFVAVSEVRSLAGRSADAAKEIKNLINASVERV  
1400 GQGTALVDRAGTTMTEVVNSIRRVTDIMGEISAASTEQSQGVAQVGEAVTQMDQATQNAALVEEMAAAAS  
1401 SLRTQAQDLVQVAVFKLGQGEGRGLSLSSSGVLAIR  
1402 >Cupriavidus\_sp.\_USMAHM13\_1 |WP\_071018009.1 HAMP domain-containing  
1403 protein [Cupriavidus sp. USMAHM13]  
1404 MKIRDMKIGTRLAFGFVILALLVNLNTAFSVYRMRELSQQTRAMMSEPLAKERLVADWTSLVAVGIVRTSA  
1405 IARSSDPALAGFFAEQTKASSARGAALMKQIEAQADETDKPVLRQAAEVRQAYIARDEIMKIKGSASEAE  
1406 IERLMQERYLPSAKGYEEALRSLLDLQRSINATAQRIDALAEERTRTVLIVTAALVAFAIGFAWWLTVGI  
1407 TQPMRHAVQAAQVAQGDLSGQAGAQQGPYARDESGQLLQALAEMRGLNGIVHEVHRGTQTIGGASRQIA  
1408 AGNLDLSSRTEQQAASSLEQTAASMEELTSTVQRNADNARQANQLAVSASAVANHGGEVVARVVQTMESIHT



1409 SSKHIVEIIGVIEGIAFQTNILALNAAVEAARAGEQGRGFVAVVAGEVRLAQRSASAAKEIKSLIDASVAQ  
1410 VEGESALVGQAGSTMAEIVESVKRVTDIMGEITAATQEQTGIEQVNQAITQIDETTQONAALVEQASAAT  
1411 QALEDQARLLLLQAVGTFRLDAGAGIEAAPPASAQPVQAARAGKPEAGAGATQGTAPRSPRQPAPARLPAQ  
1412 RLEPAMAQPQRQAAAAARAAAASSDDWEQF  
1413 >Pectobacterium\_carotovorum\_1 |WP\_015841603.1 methyl-accepting  
1414 chemotaxis protein [Pectobacterium carotovorum]  
1415 MKNYKIGTRLAGGFGLLIALSLAMLTSGIYQLNQVSSSTKQMMQEPLRKERLASDWHATLVAGVQRSMAVA  
1416 RSNDDSLVELFAAENTRASKEGKRQEQFASLISTPEEKALFDKVGGEYRQSYIKKRDAIIAEKGAGNFDRA  
1417 RSLFDNEFVPASNGYLASVEALRDHQRASIDQMGQDINTGASRGDLILAVTGALSATIGVLIWVLRTRIV  
1418 QPLARAVRATQAVAAGDLTHNVQPEGRDEAAQLLHALQDMTVRLRTIVGEVRQGSSEIAGASSQLAAGNID  
1419 LSSRTEEQASALQETAASIEQLSSTVRQADNARQANLAQSTTQQAQSGGQLVTEVVETMGAIDSSSKKI  
1420 VDIIGVIDSIAFQTNILALNAAVEAARAGEQGRGFVAVVASEVRLAQRSASAAKEIKELIDRSVQTVQV  
1421 RLVVQAGASIQDIVNGVRKVSIDLVEISSASNEQTMGIEQVNVAVNQMEVTTQONASLVNEASAATQSLQQ  
1422 QAAQLAETVSQFRLGNSHQIARTPAAAPSLALQPALAAPGKNVATAGEGDWTSF  
1423 >Herbaspirillum\_huttiense\_2 |WP\_039788802.1 methyl-accepting chemotaxis  
1424 protein [Herbaspirillum huttiense]  
1425 MIKNIIRIGSRLGAGFAVVLVFSMVVAAVGIWRLKTVAAQQTQOMMDVPLKTERLVSQWNTLLLIATQRTTTV  
1426 VKSRDPELEAFLAKEAAAASSKESAQTLKDVEQLLTSEEEKLFAAINAARKQFLAIRDQIYAAKKEGDAAK  
1427 VDQLYQQQYVGIANNTOGAMRSLDFERARIDEISADIQKDAASSQWQIFALEAVILACGIAFALLLRSI  
1428 TRPVHAALAIISQVAAGDLTSRAQPMGQDELGQLVASLQGMSERLHGVVSTVRLGADSI AVASGEIANGNL  
1429 DLSARTEEQAGALEETAASIEQLTSSVRTNSENANQANDLVKSAASIAGQGGQVMQELIDTMGNINSSSRK  
1430 IVDIIGVIDGIAFQTNILALNAAVEAARAGEQGRGFVAVVASEVRLAQRSASAAKEIKQLIDDSVSKVDAG  
1431 SELVERAGKTMQEVVGSVQGAHALVGDISTASREQAEGIHQVNQAVSQMDGVTQONAALVEQAAAAAKSLE  
1432 DQAAQLKRAVAFFSLQAA  
1433 >Achromobacter\_xylosoxidans\_1 |WP\_063954850.1 methyl-accepting  
1434 chemotaxis protein [Achromobacter xylosoxidans]  
1435 MKNMKLGLTRLAGGFALLLAMIMVMCVVGLVSLANINDSVDTLTQRSLTKERLINDWARNIQTGVTRTTAIA  
1436 KSADASLAGFFTEEAASSTRNSSALQQKIEPLIETDEEKALWQIGKARADYLRTRDGIKAKQEGNVEEA  
1437 NKIFTQEFLPATRQFIDNINRLSALQRADIDARAAEIEASYGNANLWMIVIGSIAVVCGLLMSVLLTRSI  
1438 RPLSDAVRVARTVAANDLTSTITVRSRDEIGQLMMALESNMNANLAATVARIRTGVDSIASASGEIAGNTD  
1439 LSSRTEEQAASLEETAASMEQLSSTVKQADNARSQANQLAAAASETASRGGATVSEVSTMNAISSSVKI  
1440 SDIVSVIDGIAFQTNILALNAAVEAARAGEQKGFVAVVAAEVRTLAQRSAQAAKEIKVLIEDTVQKIGQGS  
1441 GSAERAGATMQEIVSSVQRVTDIMGEIAAASAEQADGIEQVNRAVSQMDEVTTQONAALVEEAAAAAGSMQD  
1442 QSADLTRAUSAFAFRPLGGGERVLAVEAVSSVHAAGTPASRRLAAY  
1443 >Orrella\_dioscoreae\_1 |WP\_098020966.1 HAMP domain-containing protein  
1444 [Orrella dioscoreae]  
1445 MNQYKIGVRLAAGFGLLILFSLVMLASSLLQLQHVAAEETRNMMASPLHKERLISDWYRTVHTGVRRATAIA  
1446 HSTDTSLAALFAEDNAEGTRQSTAAQKLETLTLLATPEEKTFLDQLGRNRIAYVKARDAISAEKSAGRVEEA  
1447 NRIFQNDYLPASKLYLGLSLQSLLEDEQRATIDRSAAEIDASATRQYVVLVSGIGIAIVFIGVLLGWRFRTRIV  
1448 HPIGHSVLAQAQRVAAGDLTHDVRVTGRDEAAQLLQALSMDTARLRSIVGELRSGSETIAGASSQIAAGNAD  
1449 LSSRTEEQASALQQAASIEELTSTVRQADNARQANQLARATASQAQEGGQLVSEVVQTMGAIDASSKKI  
1450 VDIIGVIDSIAFQTNILALNAAVEAARAGEQGRGFVAVVASEVRLAQRSASAAKEIKALIDNSVGTVEEEN  
1451 RLVERTGGAIKDIVQGVQVSDLVGEISAASEEQTHGIEQVNAVAQMEQTTQONAALVEEASAATMALQD  
1452 QAGQLAGVAGVFRVTRGAVPVALPGAQARRHEDEDFQDPRGPRLLPA  
1453 >Achromobacter\_marplatensis\_1 |WP\_088587806.1 HAMP domain-containing  
1454 protein [Achromobacter marplatensis]  
1455 MKNMKLGLTRLAGGFVLLAMIIMSIVGLVSLANINDSVETVTQRSLIKERLISDWARNIQTGVTRTTAIA  
1456 KSADASLAGFFTEEAASVTKNSSALQQQIEPLIETDEEKKLWEGIRKSRGDYLRTRDAIFKAKQDGDVDA  
1457 NRVFTQEFLPATRQFIDQITKLTNLQRADIDASAADIQSAYGIANFWMIAIGSIALISGLLLAILLRSIT  
1458 RPLSDAVRVARTVAANDLTSTITVRSRDEIGQLMQALESMNANLAGTVASIRTGVDSMASASGEIAGNTD  
1459 LSSRTEEQAASLEETAASMEQLSSTVKQADNARSQANQLAAAASDTASRGGATVSEVSTMSAIISSSVKI  
1460 ADIVSVIDGIAFQTNILALNAAVEAARAGEQKGFVAVVAAEVRTLAQRSAQAAKEIKTLIEDTVQKISQGS  
1461 ISAERAGATMQEIVSSVQRVTDIMGEIAAASAEQADGIEQVNRAVSQMDEVTTQONAALVEEAAAAAGSMQD  
1462 QAAELTRAUSAFAFKLPGAGQAGGGEAQAVRLAAPVRQIAAY  
1463 >Janthinobacterium\_sp.\_HH01\_3 |WP\_008444154.1 methyl-accepting  
1464 chemotaxis protein [Janthinobacterium sp. HH01]

1465 MKITDLSIGRRLSLGFAVILAILILNTGLGVYRLQGVADSTRAMMELPLAKERLIADWYRVVFAGIRRTTA  
1466 VAKSADPVLATFFFAEEAKNSTAYAQGLIKKIEELATDDDKALMADLVNTRKVVYVASRDGVMKAKAAGDADG  
1467 ATKLLDEAYI PAAKTYEAMLQKMLDHQRKEIDAAAARIDQVAKDSRNLVAMAALVVAFAVFWLLTAGI  
1468 TRPINEAVALAECVAGGDLVDHGNRAAAGYSQDEPGKLLQALHRMSGGLVRIVSDVRNGTDAIATASQAIA  
1469 AGNLDLSSRTEQQASSLEETASSMEELTSTVKQNAENARQANQLAASASDVAQRGGAVVSDVVQTMASIDE  
1470 SSKKIVDIIIGVIDGIAFQTNILALNAAVEAARAGEQGRGFVAVASEVRNLAQRSASAAKEIKALIGDSVGK  
1471 VAAGTRLVGQAGSTMEEVVASIRRVTDIMAEISSASSEQTNGIEQINNSITQMDHVTTQNAALVEQAAAAA  
1472 DAMQEQAACLADAVSIFKLGDAAPRRPAMQGRGGARPMLARGG  
1473 >Curvibacter\_delicatus\_1 |WP\_066710381.1 HAMP domain-containing protein  
1474 [Curvibacter delicatus]  
1475 MNQLSRLSVAKRGLGFALVLLLSIVVIGVSI SQLNAVANATEEMVQNP I KTERLVSDWYRNLRGTGIRTTI  
1476 AVSRSGDPTLADFFAEDAKASSKSSGELQKAVEGLMFLSEKKLYQEIGELRLLYLKNRDAIVALKKEGRV  
1477 EEANTLLEKQFIPDANKYAAAMEALLKNQRDQVDTLAQDISARRQSSRQLLVVLGLLSVAFGALCAWLLAS  
1478 SITRPLAQASDVAQRVASGDLTAVI PAHGTDEVGQLLTSLQHMQNLI SVVSNVRSSESSTASAEIAQG  
1479 NQDLSRSTESQASALEETAASMEELSSTVKQNADNARQANQLAQSASTVAVQGGVEVAQVVDTMKGINEAS  
1480 RKINDIISVIDGIAFQTNILALNAAVEAARAGEQGRGFVAVASEVRSLAGRSAAEAAKEIKTLITDSVTRVE  
1481 QGSALVDQAGSTMSEVVASIRRVTDIMGEISASSEQSAGVGQVSEAVTSMDQATQNAALVEEMAAAAAS  
1482 LRGQAQELVQTVAVFKLSAKDSAVSYAPATAENATPVVPRPAPAVPAKPKVKSAAKLSAPASAPTPKPAK  
1483 AADGDDWETF  
1484 >Massilia\_sp.\_BSC265\_1 |WP\_081897558.1 HAMP domain-containing protein  
1485 [Massilia sp. BSC265]  
1486 MNWIVNMNIGRRLGVGFALILAMATACAGFSLWRLSMVAASTEAMALPLKKERMIVEWVKQVFGAIRRTTA  
1487 I IKSSDDSLKTFKDDAATTSGRSTELINMIKPLLDTPAEQSLYQKIVDQRKVYKDATTAAEMAKAEGQHE  
1488 AALKLINDVYLPAAKTYQDQLLVVMQHRNMDAQGA IQEIQVQTRNLVILFAGVIVIVGFVMAWLLTRS  
1489 IVAPIRQAVTVAETVASGDLTHRFDARTKDETGALLRALRHMNDSLTRIVGEVRRGTSIIHLAAAEIAAGN  
1490 LDLSARTEQQAASLEETAASMAHLTDTVRQNANNARQANELSIAASGVASQGGQVVAQVVTMGSIDASSR  
1491 KIVDIIIGVIDSIAFQTNILALNAAVEAARAGEQGRGFVAVASEVRTLAQRSAAAAKEIKSLIDDSVSKVEA  
1492 GTRLVDQAGTTMEQVVS IQRVTDIMAEIASASQEQTSGIEQVNGAIGQMDAVTQNAALVEEAAAAAESL  
1493 QSQAVKLTAEVDLFLKLDRAALQVAARPLLGQNEVRVVA  
1494 >Xylophilus\_sp.\_Leaf220\_1 |WP\_055841875.1 methyl-accepting chemotaxis  
1495 protein [Xylophilus sp. Leaf220]  
1496 MRLQNLNIGARLGLGFGILILLTAAI LAVGVWRLQAVAAESAEMMALPLTKERLVSDWYSVIQASVKRTTA  
1497 VAKSADPSLATFFFAEESAQSSRNSTEQQRLEELLASPKEKTLFAALVQDRKAYIAVRDAVAKAKQEGRAD  
1498 EADRLFTAEFQ PAVRYLKSLQALLDEQRAAIDAAAASVRQGYERGLAQMLVLGAAALLVAAVLAYLITRS  
1499 ITRPLDRALAVAQTVAAGDLTDDVGATSLDETGRLLQALDAMGQRLRETQVVRHGADGIATASSEIASGN  
1500 LDLSTRTEEQASALQQTAAASMEQMTATVRQNADNARQANQLAQSTSDLAARGGVVGVNVVSTMAEIH TASR  
1501 KIVDIIISVIDGIAFQTNILALNAAVEAARAGEQGRGFVAVAAEVRTLAQRSATAAKEIKGLIDDSVMRVDA  
1502 GNRLVDEAGGVIREVVQGVRRVTDIVGEITSASQEQTTGLEQVNTAITQMDQVTQNAALVEEAAAATGSL  
1503 ESQAAQLVAAVAVFRLQHEGAPRLAA  
1504 >Methylibium\_sp.\_YR605\_1 |WP\_052204918.1 methyl-accepting chemotaxis  
1505 protein [Methylibium sp. YR605]  
1506 MKLNDVRVGARLGGGFVAVTLALLCLIMVVGIVWRLGAVGQATQTMMEVPLAKERLASEWLRNVHIGVMRGRA  
1507 IAKSSDPSLEALFADEVKASTVRGNEIVQALKALPTGAEQQLLVDKINDTRKPYLAARDTMMAAKRAGNAD  
1508 EAMRIYESGFMVASPIYVAAMTAYVDFQKKSIDDMARQIEADGARGRWLIGVTGCLALVFGAVFALLTRS  
1509 ITVPVAEAAASLADAVAAGDL SRRVTVDGSD E IAGLMRSLGKMNASLHDMVTQVRQSADSIQVASSEVATGN  
1510 QDLSRTEQTASNLOQTASSMGLTGTVKQTADSARTANQLASSAQGAAGKGGVEVVSQVVTMNDIHASSK  
1511 KIADIIGVIDGIAFQTNILALNAAVEAARAGEQGRGFVAVASEVRS LAQRSAAKEIKSLIDASVDKVD S  
1512 GSRLVADAGQSMTEIVTSVRRVSDIIGEITSAASEQSDGIGQVNTAVTQLDQMTQNAALVEQSAAAAESL  
1513 KEQAVKLSGVVSVFRLSA  
1514 >Massilia\_timonae\_1 |WP\_071361774.1 HAMP domain-containing protein  
1515 [Massilia timonae]  
1516 MGNFIKLNIGTRLAAGFALTLMTVIIATVGVWRLNQVAHETEAILAEPLAKERMIAEWYTIQIFA AVRRTA  
1517 AIVKSSDPSLTEFFKEDSAATGKLSADLVKQIEPLISGDDETALFKSVMEHRAAYS KARDGAVKAKAEGNV  
1518 ELAEQILTQQFNPTAKAYQERVKELVDLQHKRIAASAGLIASTAARGNVVIGSLAAGALLLGGVFAWLLTR  
1519 SITRPLRQAVHAAEQVAAGDLTVEIDTRATDETGALLRALGHMNTSLSKIVDEVRSQTITISGASSEIAAG  
1520 SFDLSSRTEQQAALAEETAASMEELTGTVRQNADNARQANQLAIAASSVATQAGQAVDQVVTMGSINDSS  
1521 RKIVDIIAVIDGIAFQTNILALNAAVEAARAGEQGRGFVAVASEVRTLAQRSAAAAKEIKQLIGDSVEKVD

1522 TGTRLVDHTGATMREVVDSIQRVTDIMGEISSASQEQITGIDQVNOAMGQMDNATQQNAALVEEATAATAA  
1523 LQDQAQRLAQVVDVFKLDARYVTPAAPVAVKRPAPALAKPVARAAAKPAPVAKPAAAKATGKPAAPAK  
1524 VNEAEWEEF  
1525 >Acidovorax\_3 |WP\_056411403.1 MULTISPECIES: methyl-accepting chemotaxis  
1526 protein [Acidovorax]  
1527 MSRLSDLSVAKRLALGFSVLVLLLLIGAIALSISRLNAVADATLEMVQNPIKTERLVSDWSRNLRTGITRRTA  
1528 AVARSSDPALADFFAEDSKASSKSSGELQKAVEALMFLDSEKKLFAEIGTLRTIYLKNRDDIFALKKEGKV  
1529 DEANAMLVKQFMPEAANYAAKMDPELLNNQREQVDALGRAVEENRQTSRQLLIALGVLSVAVAALFSWVLSR  
1530 SVTVPLGQASDLARRVAAGDLTATVPQHGKDEVGALMESLALMQANLASVNNVRHGAESVSNASSEIAQG  
1531 NTDLSSRTEHQASALQQTAAASMEQLNSAVRNNADNARQANQLAMTASSVAAQGGAVVGDVVTMKGINDAS  
1532 RKISDIIAVIDGIAFQTNILALNAAVEAARAGEQGRGFVAVASEVRSRSLAGRSAAEAAKEIKNLIHASVERVE  
1533 HGTALVDKAGETMSEVVSIRRVTDIMGEISSASGEQSAGVAQVGEAVTSMDQATQQNAALVEEMAAAASS  
1534 LRNQAHDLVQVVAVFKLSGDQSRPAMAPAKAPAPQARPARPAVAQAPAKPLAKAAIARAPSPAARPA  
1535 APALAQPAAPRPDPRSAPKGGDDWESF  
1536 >Achromobacter\_sp.\_DH1f\_1 |WP\_025136919.1 methyl-accepting chemotaxis  
1537 protein [Achromobacter sp. DH1f]  
1538 MNNLKLGTRLAGGFVALLAMILTMCIVGLVSLANINASVETVTQSRSLIKERLINDWARNIQTGVRTTTAIA  
1539 KSADASLAGFFAEAAATSTRNSSALQKIEPMIESAEERQLWEGIGKSRAEYLRTRDGFIFKAKQEGNVEAA  
1540 NKIFTQEFLPATRFIDQITKLSNLQRADIDAQGAIESAYGVANFWMIAIGSIAVVSGLLLAVLLTRGIT  
1541 RPLSQAVRVARTVAANDLTSAISVTSRDEIGQLMLALQSMNATLVGTVARIRTGVDSIASASGEIAAGNTD  
1542 LSSRTEQQAASLEETAASMEELSSTVKQNADSAKQANQLAAAASDTASRGGATVSEVVSTMSAISASSVKI  
1543 ADIVSVIDGIAFQTNILALNAAVEAARAGEQGGKGFVVAEVRTLAQRSAAAKEIKVLIEDTVSKIRQGS  
1544 GSAERAGATMQEIVSSVQRVTDIMGEIAAASAEQADGIEQVNRAVSQMDEVTTQQNAALVEEAAAAAGSMQD  
1545 QAAELTRAVSAFKLPGGSQVAGR PALASTGSTDHPSGPALRIIAY  
1546 >Diaphorobacter\_polyhydroxybutyrativorans\_2 |WP\_088886815.1 HAMP  
1547 domain-containing protein [Diaphorobacter polyhydroxybutyrativorans]  
1548 MENFRIGTRLTAGFGLLILFAVLMLTVGVWQLQEVAGSTRQILSVPLQKERLVTDWYGVIRASIQRATAVA  
1549 RSSDDSLTELFAAENAASSKETNERQAQFVKLISGSEEQALFDTLSGHRQAYIQARDAAIAAKKGGQAEQV  
1550 TTLPERAQFVFPASRQLESALALRDFQRASIDRNGQDIDSSATASSWLMGGIGLVVLVAGIGVAWILTHSIT  
1551 APLARAVQATQVVAAGDLTHAVHSSGRDEGAQLLQALQAMTDRLRRTIVSEVRQGADSIAGASAEIAAGNLD  
1552 LSRTEQQAASLEETAASLEELTSTVRQNADNAHQANQLARTAAEQAGGQVMDDVMQTMRAIDASSRKI  
1553 VDIIGVIDSIAFQTNILALNAAVEAARAGEQGRGFVAVASEVRSRSLAGRSSEAAKEIKDLIGRSVNTVEAGN  
1554 QLVAKAGTSIQDIIRSVDQVSALVGEISSASREQSSGIEQVNI AVAHMDQATQQNAALVEEATAATQSLQG  
1555 QAAQVAQAVGVFRVDSSAVALPAPQA  
1556 >Massilia\_sp.\_KIM\_1 |WP\_078034342.1 HAMP domain-containing protein  
1557 [Massilia sp. KIM]  
1558 MITFNKLNIGTRLAAGFALTLLMTVLI AAAGVWRLNQVAAETRE IMAEPIAKERMIAEWYTQIFA AVRRTA  
1559 AIVKSSDPSLTTYFKEDSAATSKLSTELVKRIEPMIKGEDETALFKAVIEHRKTYSTARDNAVKAKAEGNV  
1560 ELADQILEQSFTPAAKAYQEQVRKLELQHQRIAASAATIDANARSGETMIIALAAAALALGAVFSWLLTR  
1561 SITGPLREAVKAAETVAAGDLTVSLDTSRQDETGALLRALRHMNDSLARIVSEVRTGTEQISTASGEIASG  
1562 SFDLSARTEQQAASLEETAASMEELTGTVRQNADNARQANQLAIAASTVATDAGSAAEQLIATMGSINESS  
1563 RKIVDIIIGVIDSIAFQTNILALNAAVEAARAGEQGRGFVAVASEVRNLAQRSASAAKEIKQLIGDSVEKVD  
1564 AGAKLVDRTGATMQEVVTSIRRVTDIMGEISSASQEQIQGIDQVNRAMSEMDQATQQNAALVEEATAATSA  
1565 LQEAVRLAKVVDVFKLDPSQRAAAPAATRPAATLPALRASAPLKRPAPLKAAKAAKATATVDGDWEQF  
1566 >Massilia\_yuzhufengensis\_1 |WP\_091876734.1 HAMP domain-containing  
1567 protein [Massilia yuzhufengensis]  
1568 MRTFNLP IGVRLAAGFALT LIMAVLIAGTGMWRLQVATAAQVTLAAPLAKERLIAEWYTQIFA AVRRTA  
1569 AIVKSSDPSLTAYFKEDAAATGKLAADLVKQIEPLIAGDKIEALFKRVQEQRKLYGAARDNAVKAKSEGNO  
1570 ELADKILDESFTPVSKAYQESVRELVALQRDAIAATAQDIDATAERGGMIIAGLTAAAVILGALFSWMLTR  
1571 GITRPIRAAVQAAERVAAGDLTHRIDADSKDETGALLRALGHMNDLSVKIVSEVRSGTETIGTASGEISAG  
1572 SLDLSARTEQQAASLEETAASMEELTGTVRQNADNARQANQLAITASSVATQAGSVVEQVITTMGSINESS  
1573 RKIVDIIIGVIDGIAFQTNILALNAAVEAARAGEQGRGFVAVASEVRTLAQRSAAAKEIKGLIGASVEKVE  
1574 AGTRLVDQTGETMEQVVTSIRRVTDIMGEISSASQEQIHGIDQVNOAMGLMDEATQQNAALVEESAAAAGS  
1575 LQDQASRLAQMVNVFRLDARAAAPAGKPPRALAVTAKPAASY  
1576 >Bordetella\_genomosp.\_1\_1 |WP\_094830849.1 HAMP domain-containing  
1577 protein [Bordetella genomosp. 1]

1578 MKNLKLGTRLAGGFVLLAMTTVMCLVGLYALSNI SGAVEDMTQQRSLIKERMISDWSRYIHTGVTRTTAIA  
1579 KSSDPSLVQFFSQAADSTKRASQLQQQIEPLIQSDEEKRIWADLGTARTAYLSSRDRSYKAKQDGDIAAA  
1580 TRIFEQEYQLQASRRFIDVITQLQELQRNAIDAQAASIDSAYRSANLWMVVLGVVAVVSGLLLAVLLTRGIT  
1581 RPLAQAVRVARTVASNDLTSRITATSRDEIGELMGALQTMNANLAGTVTRIRSGVENIASASSQIAAGNAD  
1582 LSSRTEQQAASLEETAASMEQLSSTVKQNAESARQANQLAAAASDTASRGGATVTEVVGTMSSAISASSVKI  
1583 ADIVSVIDGIAFQTNILALNAAVEAARAGEQGGKGFVVAEVRSLAQRSAQAAKEIKTLIEDTVHKIGQGS  
1584 DSAERAGATMQDILSAVQRVTDIMGEIAAASAEQADGIEQVNRVAQMDQEVTTQQAALVEEAAAAAGSMQD  
1585 QAADLRGAVSAFKLQGGTPTQADAQTTPRPGAAPLALAAAY  
1586 >Paucibacter\_sp.\_KCTC\_42545\_1 |WP\_058719952.1 methyl-accepting  
1587 chemotaxis protein [Paucibacter sp. KCTC 42545]  
1588 MSVTLISGHSIGRRLNIAFIVLLIALAGSAMGYWSLQKVANETATMYEETLLAERLAGDWQRNIVSGVNR  
1589 STAIASVSKDNSLAEIFSTAAAESTRQSSELQKQLEVLTTSPERKLFQELSQRKPYLASRDALTKAKKAG  
1590 DAEGAEIIFKQFLPAAAQFQDSIKLIVQEERNQLDAAAKRVANTNSQARIALLVFVSVCALLVGATLALRL  
1591 TRSIARPLSQAAASADAIAHFDSLRRIVVDSNDETQGLQQAQKTMQESLIRLIGEVRSSTDSISTASAEIA  
1592 TGNHDLARSARTEQTAASLQEAASMAQLTGTVRQTAESAVTANQLANSAAEVARRGGTVVAQVVSTMEDISA  
1593 SSRITDIIIGTIDGIAFQTNILALNAAVEAARAGEQGRGFVAVASEVRSLAQRSAAEAAKEIKTLIGASAER  
1594 VESGTQLVQAGATMSDIVASVQRVSDIIAEISTASREQSDGINQVNSAVGQLDQMTQQAALVEESAAAA  
1595 ESLRDQSGRLASAISVFRLL  
1596 >Caballeronia\_sordidicola\_2 |WP\_051888411.1 methyl-accepting chemotaxis  
1597 protein [Caballeronia sordidicola]  
1598 MNMLRDMKIGKRLAVGFALIFLVSLASSLVSIWRLHDVATTTHEMMHTPLAKERMISDWYRATYGSIRRTM  
1599 AIAKSNDSLDSFFAKDAADALQLATDMQNKIAPLLETDQEKALYTALIDARGKYAKSRDALKKAKEDGKN  
1600 ELASKMLDETFVPAAKEYELRLRDLDAQRTSIDHVSDEIDAAEFRTRNALIMMAVLSMLAGGLVALLLTL  
1601 SITRPLASALRMARFVADGDLTASIRNSAKDEPGQLLDALDQMSVTLRGIVAQVRSQSDMIEVASSEVAAG  
1602 NIDLSARTEEQAASLEQTSATMGSLTQTVRNSSNAREVDQLARVASEVALRGSMEVAEVAATMAVISSSA  
1603 KQIVNIIGVIDSIAFQTNILALNAAVEAARAGEQGGKGFVAVASEVRGLAHRSAASAAREIKALIGDSVQKVD  
1604 TGTYLVERAGKTILEMVENIKHVQHLVGEISSASQTSISIEEVNQAILQIDTQQAALVEEAAAAASS  
1605 LKEHSAKLTQIVSVFKIGTIG  
1606 >Janthinobacterium\_sp.\_CG3\_1 |WP\_017874946.1 methyl-accepting  
1607 chemotaxis protein [Janthinobacterium sp. CG3]  
1608 MMKITDFNIGTRFLFGGFASILVVAIAASAVGIWQLRTVAIETRTMAEQPLAKERFVSDWYRNTASNILRRT  
1609 SIVRSADDTLASFPAADIAATSASITDIQKAIIEPLLASAAEKTAYEHVGEARKLYIKARDGAIAAKRGDA  
1610 DASARLMEQQFLPAAKQYNEALSALLAMQRESINANAQNIIEKQYQTGLTLMLLLIALLAAFGIACATLITR  
1611 SIVKPLQTAVAARKVASGDLSDGDIVAQGTGDETQGLLLALRDMNNSLRGIVGTVRGGADAIATASSEVATG  
1612 NLDLSARTEEQAASLQETASSMEEITSTVKHNADNTRQASALVASTSDVARQGGALVARVVATMGGINASS  
1613 KQIADIIGVIDGIAFQTNILALNAAVEAARAGEQGRGFVAVASEVRNLAQRSAAAAKEIKTLIGDSVTQVE  
1614 QGSTLVGQAGAIMQIVASVQRVTLVMGEIATASGEQEHGIEQINQAI SQMDTQQAALVEEAAAAAES  
1615 LQDQSAKLARAVSVFKLVRHEHA  
1616 >Acidovorax\_sp.\_Leaf78\_1 |WP\_056166736.1 methyl-accepting chemotaxis  
1617 protein [Acidovorax sp. Leaf78]  
1618 MSRLSDLSVAKRLALGFSLVLLLLIGAIALSISRLNAVADATLEMVQNPIKTERLVSDWSRNLRTGITRRTA  
1619 AVARSSDPALADFFAEDSKASSKSSGELQKAVEALMILVSEKKTFAEIGALRTIYLKNRDDIFALKKEGKV  
1620 DEANAMLVKQFMPEAANYAAKMDPELLRNQREQVDALGRSVEQNRQTSRQLLLALGALSVAVAVLFSWILAR  
1621 SITVPLSQASDLAKQVAAGNLTATVPQHGKDEVGELMSSLALMQTNLASVVNNVRHGAESVSNASSEIAQG  
1622 NTDLSSRTEHQASALQQTAAASMEQLNSAVRNNADNARQANQLAMTASSVAAQGGAVVGDVVETMKGINDAS  
1623 RKISDIIISVIDGIAFQTNILALNAAVEAARAGEQGRGFVAVASEVRSLAGRSAAEAAKEIKNLIQASVDRVE  
1624 HGTALVDKAGETMSEVVSSIRRVTDIMGEISAASGEQSAQAQVGEAVTSMDQATQQAALVEEAAAAASS  
1625 LRNQAHLVQVVAVFKLSGDQARPAATPARAPAPIPQSRPAPARPVTLAKPSAKPANPTKPAIARAPSPTP  
1626 AARKPAAPALPSSPAPRPDPSAQKGGDDWESF  
1627 >Diaphorobacter\_sp.\_J5-51\_2 |WP\_084002049.1 HAMP domain-containing  
1628 protein [Diaphorobacter sp. J5-51]  
1629 MGTRLTAGFGLLILFAVLMLTVGVWQLQGVAGSTRQILSVPLQKERLVTDWYGVIRASIQRATAVARSSDD  
1630 SLTELFAAENAASSKEINERQAQFVKLISGSEEQALFDTLSGHRQAYIQARDAIIAAKKGQAEQVTTLFE  
1631 RQFVPASRGYLESALALRDFQRASIDRAGQDIDSSATASSWLMGGMGLVVLVAGIGVAVILTHSITAPLAR  
1632 AVQATQVVAAGDLTHAVHSSGRDEGAQLLQALQAMTDRLRTIVGEVRQGADSIAGASAEIAAGNLDLSRRT  
1633 EQQASSLEETAASLEELTSTVRQNADNAHQANQLARTAAEQAGQGGQVMDVMQTMRAIDASSRKIVDIIIG  
1634 VIDSIQFQTNILALNAAVEAARAGEQGRGFVAVASEVRSLAGRSSEAAKEIKDLIGRSVDTVEAGNQLVAK

1635 AGTSIQDIIRSVDQVSALVGEISAASREQSSGIEQVNI AVAHMDQATQQNAALVEEATAATQSLQGQAAQV  
1636 AQAVGVFRVDSSAVALPAPQA  
1637 >Dickeya\_zeae\_1 |WP\_016943041.1 HAMP domain-containing protein [Dickeya  
1638 zeae]  
1639 MKNYKIGTRLSIGFGILIAFSLIMLASGIYQLNQITRNAEQIMLVPLRKERLVADWAATLSAGIQRTTATA  
1640 RSSDPSLAQVFAADNANATKENNERVAKFTELVSSKEEQGLLDQLNADRQAYIKARDEIFSAKSSGNAEQA  
1641 KQVFEQRLLPVSVQYQKSMTTLRDYQRTNIDRMREEISARAQSSYLFLGVLGLLITVVGSLLAWMLTRSIV  
1642 RPLQTSVQVNTSVARGDLTAEISPOGRDELAQLQHALQDMTGQLRTVVGEVREGAEIAGASSQLAAGNQD  
1643 LSNRTDEQSSALQETAASIEQLTSTVRQNADNARQANQLAQDTASQAQAGGQLVSEVVQTMGAIDSSSKKI  
1644 VDIIGVIDSIAFQTNILALNAAVEAARAGEQGRGFVAVVASEVRNLAQRSASAAREIKELIGHSVETVDAGN  
1645 RLVEKAGVSIQGIQVGVKSELVGEISVASQEQSLGIEQVNQAINKMEQTTLQNASLVREGYNATQSLQQ  
1646 QAEQLKQVVSIFHLEEARGGSYNLAGNRPMISPSAPA AKTLALKKPAAKTSASADDWQSF  
1647 >Achromobacter\_arsenitoxydans\_1 |WP\_043517407.1 methyl-accepting  
1648 chemotaxis protein [Achromobacter arsenitoxydans]  
1649 MKNMKLGTLAGGYAILLAMIMVMCIVGLVSLADINVSVDTLTHRS LTKERLINDWARNIQAGVTRTTAIA  
1650 KSADASLASFFAEAAATSSRNSSALQOKIEPLIESDEEKT LWQGIGKARGEYLRTRDGIFKAKQEGNVEAA  
1651 NKIFTQEFLPATRFIDHITRLSDLQRADIDARATDIESAYGAANFWMIVIGSVAVVAGLLAVRLTRSIT  
1652 RPLSEAVRVARTVAANDLTSTIVVTSRDEIGQLLRALETMNANLAGTVARIRTGVDSIASASGEIAAGNTD  
1653 LSSRTEQQAASLEETAASMEQLSSTVKQNADSAKQANQLAAAASDTASRGGATVSEVVSTMNAISASSVKI  
1654 SDIVSVIDGIAFQTNILALNAAVEAARAGEQGRGFVAVVAEVRTLQRSQAQAKEIKVLIEDTVQKISQGS  
1655 GSAERAGTTMQEIVSSVQRVTDIMGEIAAASAEQADGIEQVNRAVSQMDEVTTQQNAALVEEAAAAGSMQD  
1656 QSAELTRAVSAFRLPGGQGGVAVAAIEVVES SAALRIAAY  
1657 >Comamonas\_terrae\_1 |WP\_066475921.1 HAMP domain-containing protein  
1658 [Comamonas terrae]  
1659 MQLKDLTIGKRLGIGFALVLLALIASTAVISVLR LHALETATRQMMDVPLSKERMLADWSRYVYGGIRRTIA  
1660 IAKTGDAALAEMFAK DSETSTKNSQDLAKQIEALPSSDEEKAIQOKFAQVRKDYLS TRNAIGKEQEAGNKA  
1661 EAARLLEQHFLPTAKLYENTLDELVKLQRRTIDELADQVSDMARQSRQQLILLALLTAFCIWWAWWLTQG  
1662 ITRPIHRAMAAASRVAQGD LASDLRSDESLIRKDETGQLLRSLRDMNEGLVRIVGNVRAGAESIAGASRQI  
1663 AAGNLDLSSRTEQQASSLEQTAASMEELTATVKQNADNAQANQLAATASSVAGRGGTVVSVQVVTMEAIN  
1664 ASSRKIVDII SVIEGIAFQTNILALNAAVEAARAGEQGRGFVAVVASEVRALAGRSAAEAAKEIKALIGDSVT  
1665 QISQGSELVHLAGNTMKEIVDSVRRVTDIMGEITAATSEQSAGIEQVNQAVVHIDQATQQNAALVEEQASAA  
1666 AQSMQEQANQLTQTVSVFKLGHVG  
1667 >Comamonas\_kerstersi\_1 |WP\_054065345.1 methyl-accepting chemotaxis  
1668 protein [Comamonas kerstersi]  
1669 MPLQHISIGKRLGLAFVLTFLFIATMLAVGIWR LQAVAQSTADMMARPLSKERVISDWYRTVYSNVNRHAL  
1670 VARSSDAELARQFVADNVEASKASSRQQAQLKLISTPEEQALFDQVSVLRTRFVQARDTIYQAKAEGRAD  
1671 EAERLLRSDFQPAADAYLQTLQALLDHQRQRI SEAAAGVQAEFERGRMQLAGLGGLAVLIAVALAVAITRS  
1672 ITSPLARAVHAVETVAAGDLTHRVHSDAQDETGQLLRALDGMGDQLRNVVGVQVRQADGVASASSQIASGN  
1673 LDLSSRTEEQASALQQTAA SMEQMTSTVRQNADNARTANQLAVSASELASRGGQVVDQVVGTMGDIHEASR  
1674 KIVDIIGVIDSIAFQTNILALNAAVEAARAGEQGRGFVAVVASEVRTLQRSADA AKQIKDLITASVERVDA  
1675 GHTLVEEAGVVMRDVVAGVRRVTDIVGEISAASQEQTQGLEQVQHAI TQMDAVTQQNAALVEEAAAATRAL  
1676 EAQSVQLVQAMAHFQVGQERAVTATPALLTRA  
1677 >Acidovorax\_wautersi\_1 |WP\_092940912.1 HAMP domain-containing protein  
1678 [Acidovorax wautersi]  
1679 MNLHHFSIGKRLGLAFGLMTLFIIGMVVSATGR LHSVANDTAVMMNPLTKERLISDWYRTIYSNVS RSHSL  
1680 VARSTDATLATQFTQENAEASRASTAQQOQLAKLISGP EEQALFDRVGVLRQQFIKARDAIYKAKAEGRAE  
1681 DAQRILDAEFLPSGKGYLEGLQALLDFQRQQINAAAQSVQNNYEGGRNALIGLGVLATVAAIALAWAITRS  
1682 VTGPLHRAVSVAESVAAGDLSVRAESTARDEAGQLLRALDAMGRQLSDTVGVKVR LGADNIAMASSEIANGN  
1683 LDLSSRTEEQASALQQTAA SMEEMTATVRRNADSAALADQLARSASELAVRGGDVVGNVSTMGGIHSSSR  
1684 KIVDIIGVIDSIAFQTNILALNAAVEAARAGEQGRGFVAVVASEVRTLQRSATAAKEIKALIDDSVTQVDA  
1685 GNRLVEEAGQVISDVVAGVRRVTDIVGEISAASQEQTRGLEQVNQAVTQMDQVTQQNAALVEEAAAATASL  
1686 EAQSAQLAQAVAVFRLTA  
1687 >Dickeya\_dianthicola\_1 |WP\_024104304.1 methyl-accepting chemotaxis  
1688 protein [Dickeya dianthicola]  
1689 MKNYKIGIRLSVGFVGLIAFSLVMMASGIYQLRQISQNAEKIMQIPLQKERLVADWGATLAAGIQRATATA  
1690 RSSDASLAQVFAADNANATKENNERAAKFTALVSLNEEKALLDKLNIDRQAYIKARDDIFA AKAAGNAEQA  
1691 KQLFEQQLQPI SVAYQKSMNLLRDYQRTSIDQMRTDIAERANNSYLFLGGLGV LITAIIGSLLAWMLTHSIV

1692 QPLQKAVQVTHAVARGELTDDDISPQGRDELAQLQHALQEMTAQLRTVVGEVREGAEAIADASSQLSAGNQD  
1693 LSNRTDEQSGALQETAASIEQLTSTVVRQNADNARQASQLAQDTASQAQSGGQLVSEVVQTMGAIDSSSKKI  
1694 VDIIGVIDSIAFQTNILALNAAVEAARAGEQGRGFVAVSEVRSQAQRSASAAREIKELIGHSVQTVVDAGN  
1695 RLVEKAGVSIQGGIVDGVKRVSELVGEISVASQEQLGIEQVNMAINKMEQTTLQNASLVREGTTATQALQQ  
1696 QAEQLKQVVGIFHLEKARPDAYRVSGSRPMLAASPATKTLALKPAASSRKASASEDDWQAF  
1697 >Roseateles\_terrae\_1 |WP\_088451840.1 HAMP domain-containing protein  
1698 [Roseateles\_terrae]  
1699 MRLASRLAMGFGVVLVLLAAIVLIGGMSLGRTAESTRQMMDIPLOKERLVAEWYTLTLVGVKRYTAIAKSS  
1700 DASLADYFTNDVKIISTARGNEI IKALDGLPKSDEEKVVVDKLEARKVYTGTRDRIGAAKKSNADEAIRI  
1701 LEQEFRPQADVFLGNMVDYLKFFQKTLDEMAKEVDASTTSAQWRIGLIGALALVVGAVFAWVLRVSVTVPL  
1702 QRARQMVAVAGGDLTRSAAKAEQDEIAQMMTQLDAMRLSLQTAISTVRDSSSENIQNACQEVSAQNSQDL  
1703 RTEQTAGNVQQAASAMEQLNGTVGQTAQSSREAAQLATNAVQVATRGGEVVAQVVARMQGIHGSSRKIADI  
1704 IGVIDGIAFQTNILALNAAVEAARAGEQGRGFVAVTEVRNLAGRSAAAAKEIKSLIEASVEQVEAGTDLV  
1705 NRAGDTMNEVVGAIQRVTVGIVGEISVASAEQAEGVSQVSGAVTQMDAATQQNAAMVEEIAAAAASSLRGQAQ  
1706 SLVDVAVRVFRL  
1707 >Acidovorax\_caeni\_1 |WP\_054257022.1 methyl-accepting chemotaxis protein  
1708 [Acidovorax\_caeni]  
1709 MHKLSIGTRLAVGFGLLFFALLNSALS IWQLQASSQGAQAIIEKPLAKERLISDWYRFIHTAVRRTTAIA  
1710 KSSDPSLATYFAAEQKESAESTTAIHKQVETLMVTDEEKRLFGDITLALRANYVAARDEVIRLKREGRAEES  
1711 ARLLEATFVPAKVYVERVNDLLKLQRHALDQAAEPIREANNRTSLGILALGLLTLALGVVASLAIARGIV  
1712 RPLGRSLGVARQVAAGDLSPVVFDAAQEQETREDESSALLQALGSMQQSLTRVILTIREAAESMATASAEIATG  
1713 NLDLSQRTEQTASHLQTTAASMEELTGTVEHTAQAAARTASALAGSAATVAGRGGALVEQVVHTMESIDGSA  
1714 RRIADITGVIDSIAFQTNILALNAAVEAARAGEQGRGFVAVAGEVRSQAQRSAAAAREIKDLIADSTRRVG  
1715 EGSRLVREAGDTMREIVSAVQRVTVDEVAGIAAAAGQSSAGIAQVNASVSQLDQMTQQNAALVEESAAAQSS  
1716 LREQSERLSHVAFAFVLPTEAAVRGRALALPA  
1717 >Pseudoduganella\_violaceinigra\_2 |WP\_083941309.1 HAMP domain-containing  
1718 protein [Pseudoduganella\_violaceinigra]  
1719 MQVLSQLRIGPRLAAGFGIVLILLSAIGTSYALYHSNDTANATRAMMDRPLAKERLVS DWYVLIYSAIARTQ  
1720 LIARSSDAELSKTFATVIADSTKRGGELLKQVEALLEPEERKIYDDAMVLRKYQEAQNNIMKANQAGNA  
1721 TEGERLYRDVFDPAKGYQEKVKELLAQRKAIDATAAGINAAHERSTRMLVTLILLSFGAWAAWVISR  
1722 SITVPLNSALGIANTVAEGDLTTRFDDKTARDEIGDLMIALRGMNDALRRLVSQVQTGTTAIATASSEIAE  
1723 GNLDLSSRTEQQASSLEETASSMEELTSTVVRQNADNANQANQLAHAASDVAARGGEIVGQVETMGSIDAS  
1724 SRKIVDIIIGTIDGIAFQTNILALNAAVEAARAGEQGRGFVAVSEVRNLAQRSAAAAREIKELIDNSVSQV  
1725 NAGTSLVQQAGTTMGEVVTSVRRVTDIMGEITSASREQSVGIDEVNOAIGQMDQVTQQNAALVEEAAAAA  
1726 SMQEQAAQLAQVAASFGLGTDVARWSAQPRPATQRTDNRDAVAPALNSAPPKRLSTTEARSAPRATPRP  
1727 AANTSDDSDRSAERRTKAERRSPAAANDEWEEF  
1728 >Roseateles\_sp.\_YR242\_1 |WP\_092949773.1 HAMP domain-containing protein  
1729 [Roseateles\_sp.\_YR242]  
1730 MRVKVMAGDGAMARNGRHRIHSTATRARQPISSQVFLSRDGLHTWRLGPATGMTTLPSRI PAICRESTNCT  
1731 VNAGLLPLCPPGGARYSDASVCRCARRKYRVKLNMMRLSSRLAMGFGVVLVLLAAIVF IGGMSLGRTAQST  
1732 REMMDVPLEKERLVSEWYTLTLVGVKRYTAIAKSTDASLADYFVNDVKVSTARGNEI IKALDELPKSDEEK  
1733 KVVEQLIEARKTYVATRDRIAAAKKSNAEDATRILEQEFRPQADTYLEKMMGYLKFQKTLDEMSAGVNT  
1734 ATTDQWRIGLIGALALIVGGVFAWVLRVSVTVPLARAQSLVDAVASGDLTQSVQPDGRDEIAQMMTQLDA  
1735 MRLSLQRAISTVRDSSSENIQNACQEVSAQNSQDLQRTEQTAGNVQQAASAMEQLNGTVGQTAQSSREANQL  
1736 ATNAAEVAQRGGQVAVDVSVMQGIHGSSRKIADIIGVIDGIAFQTNILALNAAVEAARAGEQGRGFVAV  
1737 TEVRNLAGRSAAAAKEIKSLIEASVEQVEAGTNLVNRAGETMTEVVS AIHRVTGIVSEISVASAEQAEGVS  
1738 QVSGAVTQMDAATQQNAAMVEEIAAAAASSLRGQAQSLVDVAVRVFRL  
1739 >Dickeya\_1 |WP\_038917615.1 MULTISPECIES: methyl-accepting chemotaxis  
1740 protein [Dickeya]  
1741 MKNYNIGIRLSIGFGILIAFSLTMLASGIYQLRQISQNAEQIMQIPLRKERLVADWGAALAAGIQRATATA  
1742 RSSDASLTQVFAADNANATKENNERAAQFTALVSSSEEKALLDNLNTNRQAYIKARDDIFAAKSAGNSEQA  
1743 KQFFEQLRQPIAIEYQKSMNILRDYQRTSIDRMRMDIAERASNSYFFLGGLGVLITVIGSLLAWMLTRSIV  
1744 RPLQKAVLITHAVAKGDLTAEISPQGRDELAQLQFALKAMIAQLRTVVGEVREGAEAIAGASSQLSAGNLD  
1745 LSSRTEEQSGALQETASSIEQLTSTVVRHNADNARQASQLAQDTAIQAQSGGQLVSEVVQTMGAIDSSSKKI  
1746 VDIIGVIDSIAFQTNILALNAAVEAARAGEQGRGFVAVSEVRSQAQRSASAAREIKELIGHSVQTVVDAGN  
1747 QLVEKAGASIQGGIVDGVKRVSELVGEISVASQEQLGIEQVNMAINKMEQTTLQNASLVREGNTATQALQQ  
1748 QAEQLKQVVSIFHQEETSHRAYSAPGNKPRLSAPPAKTLALKPAASSGKASGSEDDWHAF

1749 >Acidovorax\_sp.\_56\_3 |WP\_099657573.1 HAMP domain-containing protein  
1750 [Acidovorax sp. 56]  
1751 MNQIAIGKRLSLGFGLLLALSLLGTLGLVWQLQTASTSTQAVIEQPLAKERLISDWYRLIHTAVRRTTAVA  
1752 KSSDASLATYFADEQKLSANTTTDIQTKEVGLMQTDAERALFKDISNLRRSYTEARDAVIELRRSGQHEQA  
1753 DAQLETRFVPAAKQYMARVEALMELQKALDESAAPIKAANDQARYWLIALGAITCGLGMALAVTITRSIT  
1754 LPLSDSVAVADTIARGDLTSSIMSTRKDETGHLRLALGDMQHSLSMIGQIRDAGNQIASASDQIAGGTQD  
1755 LSSRTEHTAANLQQTASSMEQFTATVQQSAEAARTASGLASSAAEVASQGGSIIVAVVDTMEDIHTSSRRI  
1756 ADIIGVIDGIAFQTNILALNAAVEAARAGEQGRGFVAVAGEVRSQAQSAEAAKEIKGLISTSVDKVGEGT  
1757 QLVHNAGAAMQNIVSSVQKVTEVIAHIASSAREQSDGIALVNDIAIQLDQATQQNAALVEESAAAAQSLRE  
1758 QAYRLAQAASTFKVADSAAPLRPGRQQPQLTAA  
1759 >Rubrivivax\_gelatinosus\_1 |WP\_043783764.1 methyl-accepting chemotaxis  
1760 protein [Rubrivivax gelatinosus]  
1761 MLKTLGSAKISIGRRLSTVLALVLLISFVSGSGFYWALSRTAAANQDMLLEDVSLVSERLASDWYRNISGGVNR  
1762 TTAIAVSSDANLKGKFFADVSAESTKQSTELQKKLEPMMKTEAEKALYEKLAATRKIYLGSRDEVYAARQAG  
1763 EAEKAHDIFQNKFPAAAQFQDAIRALVQMQRDELDAEAVKAADANRAARIALVVFQTCALVVGAAALALWL  
1764 TRSITVPLNEAVEVADTIASFDLRSPITPRGEDETGRLLRSLQSMQSSLRRLIGEVRASDTSIGTASSEIA  
1765 SGNMDLSARTEQTASNLQAAAASMTQLASTVVRQTADAAGTASGLANTAASVAQRGGEVVSQVVSTMEIST  
1766 SSHRISDIIGVIDGIAFQTNILALNAAVEAARAGEQGRGFVAVAGEVRSQAQSAEAAKEIKGLIGSAVDS  
1767 VETGSRMVQEAGSTMTTELVASVQRVNQLIGEIGNATREQSDGISQLNAGVSQLDQMTQQNAALVEEAASAA  
1768 GSLKDQSTRLASAVSVFRL  
1769 >Mitsuaria\_chitosanitabida\_1 |WP\_084452165.1 HAMP domain-containing  
1770 protein [Mitsuaria chitosanitabida]  
1771 MNDMRLAARLSMGFGVLLLVAAIMTVGWLGLNRTEQATRMTMAVPLQKERLVSEWYMLTIVGVKRYTAIA  
1772 KSSDPSLADYFTADVKVSTARGNEIVKSLDALPKSDDEKRVVAELTEARKTYIATRDKIAALKKAGDAEAT  
1773 ERLLTEQFRPQADAYLEKMTGYLRFQKTLDDMAAEVDEATNAAQARILVIGLLALAAGALFAWALTRSVT  
1774 RPLARAMDLVESVAQGDLTRVATAEGRDEIATMVGAIERMNASLQTAITQVRSSSESIQNACHEVSAGNQD  
1775 LSQRTEQTASNVRRAASTMEQLSGTVGHTAQSSGEANKLANSAAEVATRGGEVVSQVVARMQGIHGSSRRI  
1776 ADIIGVIDGIAFQTNILALNAAVEAARAGEQGRGFVAVASEVRTLASRSAAEAAKEIKTLIAASVDEVEAGT  
1777 ALVNRAGETMNEVVDAIRHVHRIVGEISVASAEQAQGVSVQVSGAVSEMDAATQQNAAMVEEIASAASSLRG  
1778 QALSIVDAVSVFRIHRA  
1779 >Massilia\_niastensis\_1 |WP\_020652850.1 HAMP domain-containing protein  
1780 [Massilia niastensis]  
1781 MMVTFNKLNIQTRLTAGFALTLLMTVLIAGAGAWRLNDVAQETRDILAQPLAKERYIAEWYTIQIFAVRRT  
1782 AAIVKSSDPSLGAFFKEDAATTSALSTEMVKKIEPLLEGEDEHAIFKASQELRKAYSNARDTAIKARAEGN  
1783 VELAEQILVQTYTPTARAYQLKVVRELLDLQRKRIDDAATIQTATAERSNMLIASLAAAALLGAVFSWLLT  
1784 RSITHPLRDAVRAAETVASGDLTSRIESSAKDETGALLRALRHMNDSLAQIVSEVRTGTQTMGASSELAA  
1785 GSFDLSSRTEQQAASLEETAASMEELTGTVRQONADNARQANQLAITASSVAAQAGTAVEQVIATMGSINES  
1786 SRKIVDIIGVIDGIAFQTNILALNAAVEAARAGEQGRGFVAVASEVRTLAQRSAAAKEIKQLIGDSVEKV  
1787 DAGARLVDPHTGVTMDEVVTSIQRVTDIMAEITSASQEQIQGIDQVNVQAMVQMDGATQQNAALVEEATAATA  
1788 ALQDQAARLAQVVDVFKLDDRHAAPQAIAAAARPAARPAARTPALTAAPATRPAARAPAAASSRTRTRPAA  
1789 TPTTESDWEEF  
1790 >Rhizobacter\_sp.\_Root1221\_1 |WP\_056657280.1 methyl-accepting chemotaxis  
1791 protein [Rhizobacter sp. Root1221]  
1792 MRVFSFASRSIQRLAGVLGLVLLISFTGSSSLGYWALAAARETRAMYTDLSLATERLASDWYRNISAGVFR  
1793 TTAIAASSDSSLADFFAASAAEASKQSSELQKALDERMQSPAERAAFDKLTVEVRKDYIAARDAISAARKAG  
1794 DADQAKQILETRFKPLAVSYQDNIKNIVQAQRDELDAQAQRVEAANSAARTGLIVFALCALGVGGVLSAWL  
1795 SRSITRPLREAGEVADAIARFDLTRPITVRQDET SRLMQSLQTMQAALLKLIQEVGRVSTESISTASTEIA  
1796 VGNQDLSSRTEQTAANLQAAAASMTQLTGTVRQTAAAASTANQLASSATEVAQRGGRVSEVVATMEEISH  
1797 SSKKINDIIGVIDGIAFQTNILALNAAVEAARAGEQGRGFVAVASEVRSQAQSAEAAKEIKALIGASVER  
1798 VESGTQLVQNAGATMTEIVTSVQRVTDIAEISAASHEQSDGIGQINAVTQLDDMTQQNAALVEESAAAA  
1799 ESLRGQSGRLQEAIAVFRHLHDGAKAPAPAAWVPAPAVKPRGVSPAAAVKPKALKSPLKAGVKAAPAVKVA  
1800 AAPVKGKVPSPSPAASGSTDWESF  
1801 >Collimonas\_fungivorans\_1 |WP\_061540704.1 methyl-accepting chemotaxis  
1802 protein [Collimonas fungivorans]  
1803 MKIVNLKVGTRMGIGFAIVLSLSVISIAIGIWNLRQVATETQRMESPLAKERIVSDWSVLTNAAIARTSF  
1804 IVKSTDETLATTFEAEDIDASAKKGTIEIQNSLEPLLTSSLEKEKYALIKTLREKYQQSKVAAMKAKQGGKAE  
1805 EASKIYNSEFMPTAKSYQGELFAFLSLQRKNIDQTGQQIAQLYSRFSNLMVLLGLVIVLGVAVCAFLISRS

1806 ITRPLGEAIKVAQTVASGDLSSRIEVKTSDETGQLMQALKDMNDSLLKVVSEVRSRGTDTIATASNQIASGN  
1807 LDLSSRTEQQASSLEETAASMEQLTSTVKQNADNARQANQLAVSASGVAVRGGGVVSQVVTMDLINTSAK  
1808 KIVDIIISVIDNIAFQTNILALNAAVEAARAGEQGRGFVAVSEVRNLAQRSAAVAKEIKHLIDDSVEKVDV  
1809 GVKLVGQAGATMGEIVDSVKRVTDIMSEITAASQEQTAGIEQVNQAIMQMDQVTQQNAALVEQAAAAAASL  
1810 QDQAGNLVQVVSVMTEGTQAHAGASLKAASRAAPVAAPVYVAARNARLPSANVKTFRKRVANASAAAGSE  
1811 WDQF  
1812 >Achromobacter\_spanius\_1 |WP\_050447183.1 methyl-accepting chemotaxis  
1813 protein [Achromobacter spanius]  
1814 MNNLKLGTRLAGGFGILLAMITVMCLVGLISLANINESVETVTQRSLIKERLISDWARNIQAGVTRTTAIA  
1815 KSTDASLAAFFTTDEAAASSRNSSALQQQIEPLIQTPPEEKQLWQGVGKSRGDYLRTRDAIFKAKQSGDVDTA  
1816 NRVFTQEFLPATRFIDQITKLSALQRAEIDARAADIQSAYRTANFWMIVIGSVALISGLLLAVLLTRGIT  
1817 RPLSAAVRVARTVAANDLTSTVIVKSRDEIGQLMQALASMNANLADTVARIRTGVDSMASASGEIAAGNAD  
1818 LSSRTEQQAASLEETAASMEQLSSTVKLNADSRQANQLAATASDTASRGGATVSEVSTMSAISSSSVKI  
1819 ADIVSVIDGIAFQTNILALNAAVEAARAGEQGGKGFVVAEVRTLAQRSAAAKEIKTLIEDTVHKISQGS  
1820 ISAERAGATMGEIVSSVQRVTDIMGEIAAASAEQADGIEQVNRAVSQMDEVTTQQNAALVEEAAAAAGSMQD  
1821 QAADLTRAUSAFKLPGSVAVERVAGGRALAMTGAVALRA  
1822 >Oxalobacteraceae\_bacterium\_AB\_14\_2 |WP\_026334184.1 HAMP domain-  
1823 containing protein [Oxalobacteraceae bacterium AB\_14]  
1824 MNLLTQLRIGTRLALGFAIVLLLLAICATSVALYNARANAEEATRHMMEQPLAKERLASDWYVLIYSAVARTA  
1825 LIARSSDDSLSTTFADVIGASVKGGLMGLKQLLATDQEKAVFEASVGLRNTYQKAKTDIMNAKKAGNA  
1826 AEAERLYKDFMFAAEAYQNKVKDLLSVQRKAIDDTAHAIDAANERSNMLLMVLAVLMVAIGTLAAWVISR  
1827 SITVPLKSALEIASTVANGDLTTRFDAQTSQCEIGDLMTALKGMNDALRNVVSQVQSGTTTTIATASNQIAA  
1828 GNMDLSQRTEEQASSLEETASSMEELTSTVRQNAENAKQANQLAQAASDVAERGGAIIVGQVVDTMGSIDAS  
1829 SRKIVDIIISVIDGIAFQTNILALNAAVEAARAGEQGRGFVAVSEVRNLAQRSAAAAKEIKELIGNSVQQV  
1830 DLGAKLVQQAGATMGDVVASVRRVTDIMGEITSASSEQSIGIDQVNTAITQMDQVTQQNAALVEQAAAAA  
1831 SMQEQAAARLADVAASFGLGDEAARPPAPAARPAAPAARPALRQAAPARPAAKLGASKPATVGGEQDWEEF  
1832 >Janthinobacterium\_sp.\_64\_3 |WP\_100874105.1 hypothetical protein  
1833 [Janthinobacterium sp. 64]  
1834 MHALSHLRIGTRLAAGFALVLLLLSVISTSYALYSARVNAEATRQMMKPLAKERLVSVDWYVLIYSAIARTS  
1835 MIAKSTDETLSSVFADTIADSTKQGGSELLKKIEALLDSDEEKAIKSSIAERVKYQDAKTLVMNARKAGNA  
1836 AQAESTYRDSFAPAAAKYQNNVKALLAQORQAIDATAHAIEAANGRSFTLLLTLCALVVALGSVCWLITR  
1837 SITAPLQAAVKVAETVAAGDLRTHFGTAASDEIGDLMRALHGMNEALRKKVSEVQGTGNAIATASGEIAAG  
1838 NQDLSARTEQQASSLEETASSMEELTSTVKQNADNARQANQMAVAASSVAERGGSIVSQVVDTMGAIDTAS  
1839 TKIVDIIIGVIDGIAFQTNILALNAAVEAARAGEQGRGFVAVVATEVRSLAQRSAAAAREIKTLIGDSVEQVN  
1840 NGTRLVQQAGSTMSEVVDSVRRVTDIMAEITAASAEQSMGIDQVNQAIQMDQVTQQNAALVEEAAAAAES  
1841 MQDQAARLAQVAAGFQLEHVTVQAVPVRAARPAAPTQLAKPAARSATARQPSIAARSAPAARKPQVQVAGEQ  
1842 DWEEF  
1843 >Acidovorax\_oryzae\_1 |WP\_026434023.1 methyl-accepting chemotaxis  
1844 protein [Acidovorax oryzae]  
1845 MKFQDLSIGKRLALAFGLLTFIVGMLAVGTWRLQSVQDQTAAMMNLPLAKERLISDWYRTIYTNVSRHAL  
1846 VARSSDTALAGRFTQENAAASRQSTEQQQQLAQLISGPEEQALFDRAGVLRKQFVTARDAIYQAKVDGRSD  
1847 DAQRILDTEFTPSGKGYLDALQALLDFQRKQINEAAASVHRNYESGRNALVLLGLLATVAVALALGITRS  
1848 VTRPLHRAVSVAEAVAGGDLTARSASTARDEMGQLLRALDAMATQLRDTVGQVRRGADGIALASSEIATGN  
1849 LDLSSRTEEQASALQQTAAASMEQMTATVRQNADNAAQADQLARSASDMAVRGGEVVGNVVTMGGIHSASR  
1850 KIVDIIIGVIDSIAFQTNILALNAAVEAARAGEQGRGFVAVSEVRLAQRSATAAKEIKALIDDSVTQVDA  
1851 GNRLVEEAGTVIRDVVTGVRVTDIVAEISAASQEQTSGLEQVNRAVAQMDQVTQQNAALVEEAAAATGSL  
1852 EAQASHLVQAVAVFRLAESGTAVPRLAA  
1853 >Janthinobacterium\_sp.\_HH107\_2 |WP\_070312024.1 HAMP domain-containing  
1854 protein [Janthinobacterium sp. HH107]  
1855 MHALSHLRIGTRLAAGFALVLLLLSVISTSYALYSASVNAEATRQMMKPLAKERLVSVDWYVLIYSAIARTS  
1856 MIARSTDETLSSNVFADTIADSTKQGGELLKQIETLLVSDEEKAIKASIAERVKYQDAKTLVMNARKGGNA  
1857 AQAESVYRDSFAPAAAKYQNNVKALLSQORQAIDATAHAIEAANGRSFTLLLTLCALVVALGSVCWLITR  
1858 SITQPLKAAVKVAETVADGDLRTHFGTPASDEIGDLMRALHGMNEALRKKVSEVQGTGNAIATASGEIAAG  
1859 NQDLSARTEQQASSLEETASSMEELTSTVKQNADNARQANQMAVAASGVAERGGGIVSQQVVDTMGAIDTAS  
1860 TKIVDIIIGVIDGIAFQTNILALNAAVEAARAGEQGRGFVAVVATEVRSLAQRSAAAAREIKTLIGDSVEQVN  
1861 NGTRLVQQAGSTMGEVVDSVRRVTDIMAEITAASAEQSMGIDQVNQAIQMDQVTQQNAALVEEAAAAAES



1862 MQDQAARLAQVAAGFQLEHVATAAPVRAARPAKAAIATTQKLABRPPQARAGKPAAPKAASAAARKTPSHI  
1863 AGEQDWEEF  
1864 >Roseateles\_depolymerans\_1 |WP\_058933831.1 methyl-accepting chemotaxis  
1865 protein [Roseateles depolymerans]  
1866 MKLNNMRLASRLAMGFGVVLVLLAAIVLIAGMSLGRTAESTRNMMAVPLQKERLVSEWYMLTLVGVKRYTA  
1867 IAKSTDASLADYFANDVKISTARGNEIIKALDGLPKSDEEKVVDRLIEARKVYTGTDRDRIGAAKKNAGNAD  
1868 EAIRILEQEFRPQADTFLGNMVDYLKFKQKTLDEMAKEVDAATTSAQWRIGLIGALALVVGAVFAWVLTTRS  
1869 VTVPLIRAQQMVQAVASGDLTRSVKAEGRDEIAQMMTQLDAMRVSLQTAISTVRDSSENIQACQEVSAAGN  
1870 QDLSQRTEQTAGNVQQAASAMEQLNGTVGQTAQSSREANQLATNAVEVATRGGQVVAEVVSRMQGIHGSSR  
1871 KIADIIGVIDGIAFQTNILALNAAVEAARAGEQGRGFVAVATEVRNLAGRSAAAAKEIKSLIEASVEQVEA  
1872 GTTLVNRAGDTMNEVVTAIQRVGTGIVGEISVASAEQADGVSQVSGAVTQMDAATQQNAAMVEEIAAAASSL  
1873 RGQAQSLVDVAVRVFRL  
1874 >Janthinobacterium\_svalbardensis\_4 |WP\_096237432.1 HAMP domain-  
1875 containing protein [Janthinobacterium svalbardensis]  
1876 MHALSHLRIGTRLAAGFALVLLLSVSTSYALYSARVNTAATRQMMKPLAKERLVSDWYVLIYSAIARTS  
1877 MIAKSTDETLSSVFADTIADSTKQGSSELLKIEALLDSDEEKNIKFASIAERVKYQDAKTLVMNARKAGNA  
1878 AQAESAYRDSFAPAAAKYQNNVKALLSQQRQAIDATAQAI EAANRRSFTLLLTLCALVVALGSVCWLITR  
1879 SITQPLKAAVKVAETVADGDLRTHFGTPASDEIGDLMRALHGMNEALRKVVSEVQTGTNAIATASGEIAAG  
1880 NQDLSARTEQQASSLEETASSMEELTSTVKQNADNARQANQMAVAASSVAERGGNIVSQVVDTMGAIDTAS  
1881 TKIVDIIGVIDGIAFQTNILALNAAVEAARAGEQGRGFVAVATEVRSLAQRSAAAAREIKTLIGDSVEQVN  
1882 NGTRLVQQAGSTMSEVVDSVRHVTDIMAEITAASAEQSMGIDQVNQAI AQMDQVTQQNAALVEEAAAAAES  
1883 MQDQAARLAQVAAGFQLEHVTPAVAPVRAARPARTAPAATPRLATQRQSQATASKPAAPRAAGAAARKTPS  
1884 HVAGEQDWEEF  
1885 >Curvibacter\_lanceolatus\_2 |WP\_031255881.1 methyl-accepting chemotaxis  
1886 protein [Curvibacter lanceolatus]  
1887 MSVFQRLRIGARLALAFALILMMVVMLIVGVWRLQDIASQTHQMMERPLAKERLVSDWYRTIHTSVRRTT  
1888 AVVKSADPALATFFAEENQAASKVSSQQQKLDLEGLLETADEQAVFKQLLVHRIAYVKARDAITASKTAGQD  
1889 EEVERLFRQDFQPAGANYLGLSLQTLDDQORRAIDQTAFLIEDNNRSGRNQMLVLGALAVVLGALAVLITR  
1890 SITQPLSQAVEVAHLVAAGDLRRQISSDRNDEVGQLLNALGTMNERLRDIVNQVRQGTTHAMLHASSEIAQG  
1891 NLDLSGRTESQASALEQTAASMEEITSTVRQNADNARQAKQLVQATSERATAGGQAVGVQVQTMGQIHAAS  
1892 GRIVDIIGVIDGIAFQTNILALNAAVEAARAGEQGRGFVAVAGEVRVLAQRSQAQAAKEIKGLISASVENVD  
1893 QGHQLVEGAGSTMAQVESGVRQVADIVAHIASASQEQTGLGIEQINQAI AQMDSVTTQNAALVEQAAAATEA  
1894 LQRQAHLADLVAVFRLEGAGPALGYSRG  
1895 >Variovorax\_sp.\_CF079\_1 |WP\_093109719.1 HAMP domain-containing protein  
1896 [Variovorax sp. CF079]  
1897 MFLSTISIAKRLAIVLGVILALFLASSVIAALKLRQLGVEITGMVQDNVTRERAGADWLRHTTSGVQRAAA  
1898 IAKSSDASLIAYFAPATAASIKETNELQKFI EGQMVKPEERELFQKVGELRKDYLAAREEVSKLKLGLDLE  
1899 GAGRVFSARFEPTSVSYLAGVKQMVLDQRAGLDAQAQRAEGLRAQTTMLLIVCSTLSLIFGTLLAWFLARS  
1900 ITHPLRRAETMAQSIADMDLTGAPQASYANDETGRLLRAIDLRTALQKSLQVQGVVVNVSTASSQIASG  
1901 NQDLSRSTEEQASSLEQTAASMEELTSTVKQNADNARQANQLALSASEVAVKGGDVVSQVVTMTASINASS  
1902 KKIVDIIGVIDGIAFQTNILALNAAVEAARAGEQGRGFVAVAAEVRNLAQRSAAAAKEIKGLIDDSVGKVD  
1903 AGSQLVGEAGKTMEEIVGSVKRVTDIIGEITAASHEQTQGIEQINQAITQMDQVTQQNAALVEEAAAAAQS  
1904 LQEQAAGLSQAVSVFKLDGQQQVIRPVVPLARKAAAQPARARQAIAPQRKQLAAAGTATGGGDWETF  
1905 >Roseateles\_aquatilis\_1 |WP\_088386753.1 HAMP domain-containing protein  
1906 [Roseateles aquatilis]  
1907 MSSALTSHRSIGRLGLVQAVVLFIALIGSALGYWGLSRVAAQTAAMYEDSIVTERVAADWYRNVFNATR  
1908 TTAIAASADAGLAIYFAQQAESTKASTELQQRMEKLLTSPEERANFEKVVQLRKNYIAARDIISDAKKQG  
1909 DMARAKQVFEEQQFQAAAKDYLDGLRVVVQQQRDQLDAALAALRETNQRARWALVAFGLVALVGGALATWL  
1910 SRSITRPLGQAVDVADAIARFDLTHRIETGGNDETGQLLRSLDVMQRALLKLI GEVRGSTDISTASAQIA  
1911 SGNMDLSARTEQTASNLQEAASLTELGTVRQTADAATTANQLVSSASSTAQRGGAVMGQVVTMTMGDISD  
1912 SSRRIADIIGVIDGIAFQTNILALNAAVEAARAGEQGRGFVAVASEVRSLAQRSAAEAAKQIKTLIATSVER  
1913 VESGSRLVSDAGSTMNDIVTSVQRVTDIIAEISAASQEQSDGINQVNAAVGHLDQMTQQNAALVEEAAASAA  
1914 ESLKDQSQRLSGAI VFRLA  
1915 >Variovorax\_sp.\_EL159\_1 |WP\_093240577.1 HAMP domain-containing protein  
1916 [Variovorax sp. EL159]  
1917 MFLSNVSIKRLAIVLGAIALFLATSVAAVLKLQQLSLEIDAMIQDNVKTERRAGSDWLRHTTSGVQRAAA  
1918 IAKSGDTSLEIYFAPATAKSIKETNELQKFIETKLVPAERELFEKVGNLKRAYLASREEVSKLKLQIGDLA

1919 GASRAFEDQFQPTSTSYLAGVQVQVDMQREQLDAAAARAKDLQAQTRTLLIVCSAVSLVLGALLAWQLARS  
1920 ITRPLRSAETIAQSIADMDLTGMPQPGYAKDETGRLLRALDLMRSALQGSLMQVHGVVMNVSTASTQIAMG  
1921 NQDLSRTEAQASSLEQTAASIEELTSTVKQNADNARQANQLATSASEVAVKGGSVVSVQVVDTMGSINASS  
1922 KKIVDIIIGVIDGIAFQTNILALNAAVEAARAGDQGRGFVAVASEVRSLAQRSAAAAKEIKTLIGNSVEKVE  
1923 EGSRQVADAGRMTDEIVGSVKRVTDIMGEISAASQEQTSGIEQINQAITQMDQATQQNAALVEEASAAAQS  
1924 LQEQAAGLSKIVGEFKLEQGGQGGRSATPALGYAG  
1925 >Ideonella\_sp.\_B508-1\_1 |WP\_022980002.1 methyl-accepting chemotaxis  
1926 protein [Ideonella sp. B508-1]  
1927 MNLNQMRSLSHRLMAGFGLVLVLLGAVMAVGSMSLASTADETRQMMAVPLTKERLVGEWYRSLQVGVKRYTA  
1928 IAKSSDPSLADFFAADVKVSTARGNEIIQQLDALPKNDAETAAVAQLAARKDYIAMRDRIAAAKKAGDAQ  
1929 EAQRVLEQDFLPRANAYLAKMQEYLLQQLQSSILDGMAARVSSERTSAAQWRMGTLGLLALLAGAGCALWTRTS  
1930 VTRPLQQASRLAEAVAAGDLTHRVQIEGQDEIATMMRALDRMGESLHRAVDQVRSSSENIQTACREVSMGN  
1931 QDLSHRTEDTASNLRASAMSQNSVVSQTAQAAQEANHLAASAVTVAGRGGEVMGQVVQTMEGIHASSR  
1932 KIADIIGVIDGIAFQTNILALNAAVEAARAGEQGRGFVAVAGEVRNLASRSAAEAAKEIKSLIGASVEQVES  
1933 GTSLVAHAGQTMDEVVGAIRRVTDIVGEISVASAEQARGVAQISTAVSEMDAATQQNAAMVEQMAAAASSL  
1934 QGQAQNLVGAQVVFQLADAEPALPV  
1935 >Variovorax\_sp.\_JS1663\_1 |WP\_086920191.1 HAMP domain-containing protein  
1936 [Variovorax sp. JS1663]  
1937 MFLDNLSIGKRLAFVLGLILALFLASSVVSALKLSQLGDEITLMTEQKVKAERAGADWLRHTTSGVQRAAA  
1938 IAKSSDASLIAYFAPFTAASIKETNELQKFIETQMTTPEERQLFDKVGELRKNYLAAREEVSKLKLKAGDLE  
1939 GAGRVFDARFEPTSVAYLAGVQQIVDLQRAGLDAAAQRAEALRTQTTTTLVTCALSLSLVAGVLLAWFLARS  
1940 ITRPLRLAERTAGAIADMDLSGQPQARYAGDETGRLLQAIIDRMRAALQNALQQVQGVVGNVSTASTQIASG  
1941 NQDLSRTEEQASSLQQTAAASMEELTSTVKQNADNARQANQLAMSASEIAVKGGGVVSVQVVDTMGAIHASS  
1942 RKVVDDIIAVIDGIAFQTNILALNAAVEAARAGEQGRGFVAVAAEVRNLAQRSAAAAKEIKGLIDDSVGVKVD  
1943 TGSALVSEAGRMTNEVVDSIRRVTDIMGEITAASHEQTQGIEQINQAITQMDQATQQNAALVEEAAAAASS  
1944 LQEQAAGLSEVVGVFRLGERPLEAMPARSAVTPAPRPATLPRGKTQARTARPPQLAAAADARDGDWETF  
1945 >Variovorax\_sp.\_YR266\_2 |WP\_093176484.1 HAMP domain-containing protein  
1946 [Variovorax sp. YR266]  
1947 MFLSNVSIKRLAIVLGTILALFLATSVAAVWKLQQLSQEIDAMIEDNVKTERAGSDWLRHTTSGVQRAAA  
1948 IAKSSDASLIDYFAPATAKSIKDTNELQKFIKGLAKPEERELLEKVGNLKAYLASREEVSKFKLKGDLK  
1949 GANRIFDSQFQPTSVSYIAGVQVQVDMQREQLDAAAARANNLRAQTSTLLIVCSAVSLVLGTLALLLARS  
1950 ITRPLRSAETIAQSIEMDLTGAVQPSYAKDETGHLLRALDQMRTALQGSALTQVHGVVMNVSTASSQIATG  
1951 NQDLSRTEEQASSLEQTAASLEELTSTVKQNADNARQANQLATSASEVAVKGGSVVQVVDVETMGSINASS  
1952 KKIVDIIISVIDGIAFQTNILALNAAVEAARAGDQGRGFVAVASEVRSLAQRSAAAAKEIKTLIGDSVDKVE  
1953 EGSRQVADAGRMTMEEIVGSVKRVTDIMGEISAASQEQTSGIEQINQAVTQMDQATQQNAALVEEASAAAQS  
1954 LQEQAAGLSRIVGRFKLERQHTAASATTSVSALGTYPNAPRAYQELIASH  
1955 >Herminiimonas\_arsenitoxidans\_1 |WP\_076592488.1 HAMP domain-containing  
1956 protein [Herminiimonas arsenitoxidans]  
1957 MSFLSNVRIGTRLAIGFILVLALSVAISVALIHAKQNADATRNMMEKPLTKERITSDWYVLIYSAIARTS  
1958 MIAKSSDDTLVSVFADVIADSTKRGTVLLKSLETLLTSDEEKMYQASIDLKTYQSSKDAVMAAKKAGDK  
1959 AEADRVYSDVFLPSAKAYQDKVLEFLSMQRKTIIDIAASIDAAQQRSWNLMVLLGILMVALGAICAVITR  
1960 SITRPLKQAIIEVASSAAAGDLTSEIGPQPKDEIGDLMRALGGMNDGLKQIVNDVKAGTDFINTASAEIASG  
1961 NLDLSSRTEQQAASLEETASSMEELTATVKQNAENAQQANQLAVSASTVAAKGGAVVKEMIDTMGAINGSS  
1962 RKIVDIIISVIDGIAFQTNILALNAAVEAARAGEQGRGFVAVATEVRNLAQRSAAAAKEIKSLIDDSVNNVD  
1963 AGSKLVAEAGKTMDDVVGSIRHVTDIMNEIMAASQEQSIEQVNTAIGQMDQVTQQNAALVEEAAAAASQS  
1964 LRDQADKLAQIVSVFKLDSKQAAHAGNHTLTHRSHPSLGYDAEPFRN  
1965 >Janthinobacterium\_sp.\_CG23\_2\_1 |WP\_063896263.1 methyl-accepting  
1966 chemotaxis protein [Janthinobacterium sp. CG23\_2]  
1967 MSFLSQRIIAYWNYLILNYQENNMPLNLRIGSRLAAGFAIVLALSILSTAYAMLAARANARATQGMMAQPL  
1968 AKERMMSDWYVLTYSAVARTALIARSTDDTLATTTFAATIADSVKRSTELIRQIEPLLADDQEKAMLQAILA  
1969 QRAAYQAAKEKVVAACKAGDSAATGLAFDASFLPAASAYQNSIQAMLAMQRKSIDETASAIEQANSRTVAL  
1970 LLLLGLTAVLTGAACAVLITRSITVPLKAAVALAGTVASGDLSTRFGPAARDEIGDLMRALQAMNDALTRV  
1971 VSQVQNGTKAIAIGSTGIAAGNLDLSARTEQQASSLEETAAMEELTSTVRQNADNAHQANQLALAASQVA  
1972 RKGGAIVGQVVDVETMGSIEASSRKIVDIIIGVIDGIAFQTNILALNAAVEAARAGEQGRGFVAVASEVRTLAQ  
1973 RSAGAAREIKALIGDSVAQVSNTRLVREAGSTIGDVVDSVARVTDIMSEISAAGNEQRAGIGQVNQAIQ  
1974 MDQVTQQNAALVEEAAAAAASLEEQAARLAHVAAGFTLTAPGRRPRVAGRMALTLAA

1975 >Aquicola\_tertiaricarbonis\_1 |WP\_046114622.1 methyl-accepting  
1976 chemotaxis protein [Aquicola tertiaryarbonis]  
1977 MFLSSMSGKRLAVVLGVILSLCFASSLFAVVKLRHIGQHVDMVTDNARTERATADWLRNTTAGVQRAAA  
1978 IAKSSDSGLIEYFAPATAASIAETNKLQEQIDKAMRTPEERKLFDEVGAMRKAYLAARAEVSKLQAGDLA  
1979 GASKLFDERFEPTAKAYLAGVTQIADLQRSYLDQAAAQSAELTERTASLLVACAVLATGLGVVLAWLLAGS  
1980 ITRPLREAIEKRASAIQMDLTGQPQARYASDETQGLLRAIDAMRSALQQALGQVRGVVDSISTASSEIATG  
1981 NHDLARSARTEQAASNLQQTASSMEELTATVHQSDMASQVNQLAASAVDAARRGGQVVSQVSTMEIEHSSS  
1982 RKVADITGTIDGIAFQTNILALNAAVEAARAGEQGRGFVAVVAGEVRLLAQRSAAEAAREIKALIGASVDKVE  
1983 HGTRLVQEAGGTMEDVVTSAQRVTDMIGEVTVATAEQRDGIGQVNGAVSQLDQMTQQNAALVEQSTAATTS  
1984 LQEQAQRLAGVVAGFRLQGR  
1985 >Duganella\_phyllosphaerae\_1 |WP\_070248719.1 HAMP domain-containing  
1986 protein [Duganella phyllosphaerae]  
1987 MNFLSHTRIGTRLAVAFGIVLALLALVATTVGLLNARSQANATREMMEKPLAKERLVSVDWYVLMYSAIARTE  
1988 LIARSKDATLPTIFADVIAASSKRGAEMLGKVKELVASDEERAMFDKIVVLRNTNYQNLKTAVGKARAAGDD  
1989 AASEKIFNGEFIPAAKAYSVAVEGLLAHQKAI DATARAIDAANDRANQLLLLLLTVLMVTIGSAAAWVISR  
1990 SITVPLKSAVDIAAKVADGDLTTRFDQVQRSEIGELMTALKGMNDALVNVVSQVQTGTRTIASASHEIAA  
1991 GNMDLSQRTEEQASSLEETASSMEELTSTVRQADNARQANQLAKTASEVAEKGGAIVSQVNTMGTINDS  
1992 SRKIYDIISVIDGIAFQTNILALNAAVEAARAGEQGRGFVAVVASEVRNLAQRSAGAAKEIKELIGNSVDQV  
1993 DIGSKLVQEAGATMDDVVASVRRVTDIMGEITSASSEQSIGIDQVNTAITQMDQVTQQNAALVEEAAAAAA  
1994 SMQEQAERLADVASSFRLEAGMAAAPAVAAAPRQVAPATRPVAAARQPAPALKTAVKLTTPATKPKPKPAL  
1995 ASAPRKPATVGSDDQDWEFF  
1996 >Massilia\_sp.\_B2\_1 |WP\_099875675.1 HAMP domain-containing protein  
1997 [Massilia sp. B2]  
1998 MFPNVRIGSRLAIGFAIVLVLSILSTGYAMMAASENARATERMMAQPLTKERMISDWYVMTYSAVTRTSLI  
1999 ARSADDTLSTTFVAVAIADSVKRSTELIRQIEPLLSDEEKATMQAAILAQRATYQAAKEKVMMAKKAGDGAS  
2000 TDLAFNGTFLPAASAYQNGIQAMLGMQRKTIDDTAVAIEKSNRRTISLLLLLGLTAVLTGAVCAFLITRSI  
2001 TGPLKAAVAVAGTVAGGDLTTEFGHAARDEIGDLMRALQAMNDSLTRVVSEVQSGTNAIAIGSTEIAAGNL  
2002 DLSARTEQQASSLEETAASMEELTSTVRQADNAHQANQLALAAASQVARKGGAIVSQVETMGSIEASSRK  
2003 IVDIIGVIDGIAFQTNILALNAAVEAARAGEQGRGFVAVVASEVRTLAQRSAGAAKEIKGLIGDSVAQVSNG  
2004 TRLVQEAGTTIGEVVDSVARVTDIMSEITAASNEQVRVIGIDQVNEAIAQMDQVTQQNAALVEEAAAAAGSLE  
2005 EQAARLADVAGGFKLAATSKGRPQRVAGMKPLKLA  
2006 >Duganella\_sp.\_CF458\_2 |WP\_090439479.1 HAMP domain-containing protein  
2007 [Duganella sp. CF458]  
2008 MQFLSQLRIGPRLAAGFGIVLALLSAIGTSYALYHSNETANATRMMDRPLAKERIVSDWYVLIYSAIARTQ  
2009 MISRSSDAELSNTFATAIADSAKRGAEMLLKSIEGLLETDEERKIYQDAVTIRGKYQDAKNQVMNAKKAGDA  
2010 AGERLYREVFDPAAKAYQEKVKELLAQQRKAIDATAAGINEANARSNRLMLTLGVLLLLAFGAWAAWVISR  
2011 SITVPLNSALGIANTVAEGDLTTRFDEHTARDEIGDLMKALRGMNDALRRVVSQVQTGTTAIATASSEIAE  
2012 GNLDLSSRTEEQASSLEETASSMEELTSTVRQADNANQANQLAQAASDVAARGGEIVGQVVQTMGSIDAS  
2013 SRKIVDIIGTIDGIAFQTNILALNAAVEAARAGEQGRGFVAVVASEVRNLAQRSAAAAREIKELIDNSVQV  
2014 NAGTSLVQQAGTTMGEVVTSVRRVTDIMGEITSASREQSVGIDEVNQAIGQMDQVTQQNAALVEEAAAAAA  
2015 SMQEQAAQLAQVAASFKLGTDAVARWSAQPRAAARAVEYGARDEGSAASSEGSSARTKRLTAPDQRASSRAA  
2016 ASDASTTADRTSDRRSKTERRTPAAANDEWEEF  
2017 >Morganella\_morganii\_1 |WP\_071233384.1 HAMP domain-containing protein  
2018 [Morganella morganii]  
2019 MLHPGIQERWIVNKYKISTRLTAGFGVLIVCSLLMMVCGIWLQWQTDKNVHRMTAFVPLKERIAADWYAAV  
2020 STSTQRVSALAQSTDSSLGETFAAENIKSGKAVSELLSRFSELVNTPEEGHFLTTLIDIRAAYVRRARDEVT  
2021 LANRRGEYDVAGQRYSAADFITAADHYLGILNEIRDYQRDTISLMKSDIDKKTDDGYIFLGLLGFIIITVAGS  
2022 LMAWRLSLSIITPLNSATGLTKSVTEGDLTAEVCIRGRDETAGLLHSVQEMTVRLRDIAGNVRQGA AVSG  
2023 AATLMTEANTELSGRTEEQSAALQESAAAIEQLASTVRRNADNAGHAELLVKTAEQARSGAQLMENVIKT  
2024 MRDIESASDKIVDIIAVIDGIAFQTNILALNAAVEAARAGEQGRGFVAVVAGEVRNLAQKSADSAKEIKMLI  
2025 GTSVQTVGAGHILVDKAGEAMTGIASNILQVSDLVTEITDAGREQAQGIDQISVAVSQMEHSTQQNVSLVS  
2026 EASSAMLSLQQAEQLEQVVSIFRLPDDSGMAGEKNDG  
2027 >Mitsuaria\_sp.\_HZ7\_1 |WP\_088406013.1 HAMP domain-containing protein  
2028 [Mitsuaria sp. HZ7]  
2029 MSNTNVRGSIGRRLGLVQALVLVIALIGSAMGYLGLSRVAAQTEAMYQETIVTERVASDWYRNVYNGGTRT  
2030 TAIAVSADPALATFFAEQAAESTKSSSTELQTRMDKLLDSPERAADFDRVIELRKAYIKVRDTITEAKKQGD  
2031 PARAKQLFDEQFKPAAAAYLESIRVIAQQQRDQLDTALKALSNTNARARTALVVFGFLVALAAGGALAVWLT

2032 RSITRPLAQAAEVADAI SRFDLTRIETTSGDETGQLLRSLSEMQGALVRLIGEVRGSTDSIGTASAEIAT  
2033 GNMDLSARTEQTASNQQAAASLTQLTGTVRQTADAATTANQLAGSAAETAQRGGAVMGQVVATMGEISDS  
2034 SRRIADIIGTIDGIAFQTNILALNAAVEAARAGEQGRGFVAVVASEVRSLAQRSAQAAKEIKTLIATSVERV  
2035 DSGSRLVSDAGTTMNDIVTSVQRVTDIIAEIRAASQEQSDGINQVNAAVGHLDQMTQQNAALVEEAAASAAE  
2036 SLKDKQSNRLSTAI AVFRLN  
2037 >Duganella\_sp.\_Root1480D1\_2 |WP\_082565276.1 HAMP domain-containing  
2038 protein [Duganella sp. Root1480D1]  
2039 MQFLSQLRIGPRLAAGFGIVLLLLSALGTSYALYHSNDTANATRMMDRPLAKERIVSDWYVLIYSAVARTQ  
2040 MIARSSDGELSNTFATAIADSAKRGAE LLKSI EGGLETDEERKIYQDAVAIRAKYQDAKNQVMNAKKAGDA  
2041 AEGERLYREVFEPAAKAYQEKVKDLLAQQRKAIDATAASINEANARSNRLMLTLGILLLAFGGWAAWVISR  
2042 SITVPLNSALGIANTVAEGDLTTHFDEQATARDEIGDLMKALRGMNDSLRRVVSQVQTGTTAIATASSEIAE  
2043 GNLDLSSRTEQQASSLEETASSMEELTSTVRQNADNANQANQLAQAAASDVAARGGEIVGQVVTMGSIDAS  
2044 SRKIVDIIGTIDGIAFQTNILALNAAVEAARAGEQGRGFVAVVASEVRNLAQRSAAAAKEIKELIDNSVQV  
2045 NAGTSLVQQAGTTIGEVVNSVRRVTDIMGEITSASREQSVGIDEVNTQAIQMDQVTQQNAALVEEAAAAA  
2046 SMQEQAQLAQVAASF LKLGTEAVARWSAQPRRVADGGGAAEVEAARPKRLSAPDQRAMPRAAPRTAGSSAS  
2047 SASDHATDRRTKTERRAPATPNDEWEEF  
2048 >Polaromonas\_jejuensis\_1 |WP\_068834368.1 HAMP domain-containing protein  
2049 [Polaromonas jejuensis]  
2050 MNLANLKIGTRLGMGFALVLLLLTVIAGLGVWR LQNVGDATQEMVKEALVKERLAAHVLVATGTNSVRTFA  
2051 LVKSTDLEDQKYFQKGITQTS LGITENSKKLV SMLDTP EEEKSLYEESMAKRAAYIDLRTAALKLKADGQHA  
2052 QAVQLADAKLVPAL EAYDASIRNMLLHQEANIDQTASAI DALYRSGRFS LIALTLIALAMGGMLAWWLTIG  
2053 ITSPLKQAVQVAQTVASGDLTSHIESTARDETGQLMQALKAMNDSL VGIVGQVRQGTDTMATASSQIAAGN  
2054 QDLSSRTEEQASSLEETAASMEELTSTVKQNADNARQANQLAVSASSVALKGGSVVAQVVDTMGAINASSR  
2055 KIVDIIGVIDGIAFQTNILALNAAVEAARAGEQGRGFVAVVASEVRNLAQRSAAAAKEIKVLIDDSVKGVEE  
2056 GSQQVVSQAGKTMDEIVDSVKRVTDIMAEITAASQEQTAGIEQINQAITQMDQVTQQNAALVEEAAAAA QSL  
2057 QEQASGLSRVVSFVKLDHAQQMHVAPAKPAIAAPRRAPAGQLAAA  
2058 >Mitsuaria\_sp.\_7\_1 |WP\_067279719.1 methyl-accepting chemotaxis protein  
2059 [Mitsuaria sp. 7]  
2060 MMSNTNVRGSI GRRLGLVQALV LVLVIALIGSAMGYLGLSRVAAQTEAMYQETIVTERVASDWYRNVFNGGTR  
2061 TTAIAVSADPALATFFAEQA AESTKSSSTELQNRMDKLLNSPEERAAFDRVIELRKAYIKVRDTITEAKKQG  
2062 DPAKAKQLFDEQFKPAAASYLESIRVIAQQORDQLDTALKVLAETNARARTALVLFGLVALAAGGALAVWL  
2063 TRSITRPLAQAAALVADAIARFDLTGRIETAGGDETGQLLRSLSEMQGALVRLIGEVRGSTDSISTASAEIA  
2064 TGNMDLSARTEQTASNQQAAASLTQLTGTVRQTADAATTANQLAGSAAETAQRGGAVMGQVVATMGEISD  
2065 SSRRIADIIGTIDGIAFQTNILALNAAVEAARAGEQGRGFVAVVASEVRSLAQRSAQAAKEIKTLIATSVER  
2066 VESGSRLVSDAGTTMTDIVTSVQRVTDIIAEIRAASQEQSDGINQVNAAVGQLDQMTQQNAALVEEAAASAA  
2067 ESLKDKQSTR LSTAI AVFRLT  
2068 >Herbaspirillum\_sp.\_CF444\_10 |WP\_007881303.1 methyl-accepting  
2069 chemotaxis protein [Herbaspirillum sp. CF444]  
2070 MKQLSNMRISSRLIFGFAIVLILAIISTSMGLINAKRNAESTRAMMELPLAKERLVADWFVLTYSIVRTS  
2071 MIARSSDVNLADTFKEAIAASVSVSGSIIKQIEPRLSSEDEKALFKEIIAARNTYQAAKELVMNTRKTGDA  
2072 AAAEKAYKDVFEPAKAYADKVHGLLAMQRKAIDQMAVDIDRTNTRGMQLMMALGVLLVVISVAVIIISR  
2073 SITTPLKRALQVARMVAAGDLTANIEKHGKDEIAELMRALDEMNEALRKIVSEVQTGTESISTAANEIASG  
2074 NFDLSSRTEQQAGSLEETAASIEQLTSTVKQNAENARQANQLAQASDVAVKGSGVVSQVVDTMGAINASS  
2075 NKIVDIISVIDGIAFQTNILALNAAVEAARAGEQGRGFVAVVASEVRSLAQRSAAAAKEIKMLIGDSVEKVG  
2076 SGSRLVEQAGVTMSEMVESVKRVTLIMSEIATASQEQSQGIEQINQAVTEMDNTTQQNAALVEQASATSEL  
2077 LQAQAGKLA EAGRHF KLGHA  
2078 >Duganella\_sp.\_Leaf61\_3 |WP\_056140634.1 methyl-accepting chemotaxis  
2079 protein [Duganella sp. Leaf61]  
2080 MNFLSHTRIGTRLAAAFGIVLLLLALVATTVGLMNRSAQAIATREMMEKPLAKERLVSDWYVLMYSAIARTE  
2081 LIARSKDASLPTVFADVIAASSKRGAE LMGVKELVASDEERV MFDKIVVLR TNYQNLKTAVGNARKAGDD  
2082 AAAEKIFTGFEPTPAKAYSVAVEGLLAHQRKAIDDTAHAIDAANDRANQLLLVLTVLMVTIGSLAAWIIISR  
2083 SITVPLKSAVDIAAKVADGDLTTRFD TQVQRSEIGALMTALKGMNDSL VNVVSQVQTGTRTIASASHEIAA  
2084 GNMDLSQRTEEQASSLEETASSMEELTSTVRQNADNARQANQLARTASEVAEKGGAI VQVVTMGTINDS  
2085 SRKIYDIISVIDGIAFQTNILALNAAVEAARAGEQGRGFVAVVASEVRNLAQRSAGAAKEIKELIGNSVDQV  
2086 DIGSKLVKEAGATMDDVVASVRRVTDIVGEITSATSEQSIGIDQVNTAITQMDQVTQQNAALVEEAAAAA  
2087 SMQEQAERLADVASSFRLEAGAVSVPVAATATARKLAAVKPVAARRPAPALKPASRPATKPALTSVPRKPA  
2088 TVGGDKDWEEF

2089 >Variovorax\_sp.\_HW608\_1 |WP\_088957862.1 HAMP domain-containing protein  
2090 [Variovorax sp. HW608]  
2091 MKFLSNVRIGTRLAIGFGIVLALTIVSSVFALVSARSTAEATRQMMESPLAKERLISDWYVLTYSAIARTS  
2092 MIAKTTDETLPVTFADVISDSVVKRGTEINSKVEALLVTDDEKSMFKSIMERRAKYQAAKEVVS KAKASGDS  
2093 AETERAFKEQFQPAAKAYETGVLDDL SMERKAINDMSQAI DAANARAFTLRVAFFVLT MVFGGGFAVLI SR  
2094 SIVKPLGEAVKLAETVAAGDLSRIEVQSKDET GQLMRALKEMNESLARVVGEVRTGTDTIATASTQIASG  
2095 NQDLSRTEEQASSLEETAASMEELTSTVKQ NADNARQANQLAVSASEVAVRGGSVVSQVVD TMG SINASS  
2096 RKIVDIIIGVIDGIAFQTNILALNAAVEAARAGEQGGF AVVAAEVRNLAQRSAAAAKEIKGLIDDSV GKVE  
2097 EGSRQVAEAGRTMDEIVGSVKRVTDIMGEI TAASQEQTSGIEQV NQAI AQMDQVTQQNAALVEEAAAAA GS  
2098 LQDQATSLVQAVSVFRLDAHAQVKAAPA AKRAPPAPKGRARPAPAVRGKAVKTEPRLATSGAASGDWTEF  
2099 >Variovorax\_sp.\_KK3\_1 |WP\_077003508.1 HAMP domain-containing protein  
2100 [Variovorax sp. KK3]  
2101 MKSFSNLRIGTRLALGFGVLLLLTLLSAAFALVSASRNAEATRVMMSPLVKERLISDWYVLTYSAIARTA  
2102 MIARTSDATLPVTFAEVIADSTKKGTE TMGKVEALLFTDEEKTAFKSIVDLRAKYQLAKDAVQKAKAGGSV  
2103 QESEAVYKDFVQPAAKAYENEV LALLSIQRKDIRMSGEIDAANAASLKLRLAMTALTLLLAGAACFLIAR  
2104 SITRPLGQAVKVAETVAGGDL SRIEVE SRDET GQLMQALKNMNESLARVVTQVRSGTDTIATASGQIASG  
2105 NQDLSRTEEQASSLQQTAA S MEELTSTVKQ NADNARQANQLALSASEVAVKGGEVVNQVVD T MGSIHASS  
2106 KKIVDIIISVIDGIAFQTNILALNAAVEAARAGEQGRGF AVVAAEVRNLAQRSAAAAKEIKGLIDDSV GKVD  
2107 AGSELVAEAGRTMNEVVDSVKRVTDIMGEI TAASHEQTQGIEQV NQAITQMDQVTQQNAALVEEAAAAA AS  
2108 MQEQAASLVQAVGVFRLGDDLAVAKVLAQAKATSR SVQPLVKVPVRTAAASAPERRVAVKPAAKPAASTAA  
2109 PSGDWTEF  
2110 >Variovorax\_sp.\_WDL1\_2 |WP\_068675583.1 HAMP domain-containing protein,  
2111 partial [Variovorax sp. WDL1]  
2112 MKNWKIGTRLGIGFALV LALLAIVAGIGVLR LQNVGKAMEEMVQRSLVKERLAATWLQNTSNN SIRT FALL  
2113 KSNDAEVQDFLQKNITKTSAL ISETQKKLEGLLDTPEEQAISAEIKKRRSDYLGLRNGILK LKAEGGQDEA  
2114 ARLTNEKLI PMLDAYDASIRGMLTHQAARIDLAAGSVDTLYRSGRMNVIVLALVALALGAVLAWLLTR SIT  
2115 RPLNEAVQVAQTVAAGDLRSEVVVKTGDE TGLLMQALQGMNASLARVVGQVRNGTDTIAA ASTQIASGNQD  
2116 LSTRTEEQASSLQQTAA S MEELTSTVKQ NADNARQANQLALSASEVAVKGGSVVSQVVD T MASIHASSRKI  
2117 VDIIGVIDGIAFQTNILALNAAVEAARAGEQGRGF AVVASEVRNLAQRSAAAAKEIKGLIDDSV GKVDAGT  
2118 TLVGEAGKTMEEIVGSIRRVTDIVGEI SAASHEQTQGIEQINQAITQMDQVTQQNAALV  
2119 >Variovorax\_sp.\_YR750\_1 |WP\_093202010.1 HAMP domain-containing protein  
2120 [Variovorax sp. YR750]  
2121 MFLSNVSIGKRLAIVLGIILALFLATSAAAVWKLQQLSREIDAMIEDNVKTERAGSDWLRHTTAGVQRAAA  
2122 IAKSSDASLIDYFAPATAASIKNTNELQKFIEEKLVPDERALLEKVG NLRKAYLGAREEVSKLKLAGDLD  
2123 GANRVFDSQFQPTSVSYIAGVQVQVDMQREQLDAAAARANNLRAQTSTLLIVCSAVSLALGALLAWLLARS  
2124 ITRPLRSAESMAQSIAAMDLTGKAQSSYASDETGHLLRALDQMRDALQGS LAQVHGVVANVSTASTQIAVG  
2125 NQDLSRTEEQASSLEQTAASLEELTSTVRQ NADNARQANQLAASASEVATRGGNVVFQV VETMG SINASS  
2126 KKIVDIIIGVIDGIAFQTNILALNAAVEAARAGDQGRGF AVVASEVRS LAQRSAAAAKEIKTLIGDSVEKVE  
2127 EGSRQVADAGRTMEEIVGSVKRVTDIMGEI SAASQEQTSGIEQINQAVTQMDQTTQQNAALVEEASAAAQS  
2128 LQEQAAGSLSQIVGRFRLEHQ RQAEEDTTPGIAFSPMHLIAR  
2129 >Variovorax\_soli\_1 |WP\_068642850.1 HAMP domain-containing protein  
2130 [Variovorax soli]  
2131 MQFLRNMLIGRRALGFGFLV LVLVSLASTAFTLQSMR SSAQTTQQT VLGPLAKERLVS DWYVLTYS AIARTE  
2132 LIARSTDAALS KTFAEVIAASSKKGSETMAKVEPLLVTDEERAI FKHIGELRAKYQSAKELVMNTKTAGDA  
2133 ALAERQFNEVFMPAAKTYEKRVLDLLSHERQTIDA AVVAAREASAERFMTLMLFAAVSLVAGVAASLLIAR  
2134 SIVRPLGQAVDVARTVAGGDLGSRIVVDSRDET GQLLEALREMND SLARVVGEVRS GTDNIATASGQIATG  
2135 NQDLSRTEEQASSLEETAASMEELTSTVKQ NADNARQANQLAVSASEVAVKGGTVVGVVD T MASIN ESS  
2136 RKIVDIIIGVIDGIAFQTNILALNAAVEAARAGEQGRGF AVVAAEVRNLAQRSAAAAKEIKGLIDDSV GKVQ  
2137 AGSELVGEAGQTMQEIVGSVKRVTDIMGEI TAASQEQTAGIEQINQAITQMDQVTQQNAALVEEAAAAA AS  
2138 LQEQAAGLVQAVSVFRMGGASQAAPAARKPAGTAVARKATAPAGKARASAKAKPSVRETTRAEPAMAPSGA  
2139 SSAAGDWTEF  
2140 >Variovorax\_boronicumulans\_1 |WP\_095946608.1 HAMP domain-containing  
2141 protein [Variovorax boronicumulans]  
2142 MTFFSNLRIGTRLTLFAIVLGLTLISSAVGLMSAHKNAEATRIMMSPLAKERLISDWYVLTYSAIARTS  
2143 MIARTTDEALPMLFADVISESVKKGSETMAKVEALLVTDDEEKATYKSIVELRAKYQAAKDEVTRAKASGNT  
2144 VETVRAYQLSFQPAAKAYENRVLELLAIERRAIDDMSHAIDAANA KSFNLRLLLLTALT VLLGGLFAFFISR  
2145 SIVRPLAKAVGVAETVAAGDLSANIRVDSRDET GQLMQALKDMNANLAKVVGEVRTGTETIATASGQIASG

2146 NQDLSRTEEQASSLEQTAASMEELTSTVKQNADNARQANQLAVSASEVAVKGGAVVSQVVDTMGSINASS  
2147 KKIVDIIIGVIDGIAFQTNILALNAAVEAARAGEQGRGFVAVASEVRSLAQRSAAAAKEIKTLIGDSVEKVE  
2148 EGSKQVAEAGRTMEEIVGSVKRVTDIMGEITAASQEQTSGIEQINQAITQMDQVTQQNAALVEEASAAAQS  
2149 LQEQAQALVQAVSVFKLDANAVATTRASFRITPIPKPPKPTPKPRAKALPTRREPTGTPQLAMAGDAKGD  
2150 WSEF  
2151 >Acidovorax\_temperans\_1 |WP\_044396904.1 HAMP domain-containing protein  
2152 [Acidovorax temperans]  
2153 MFLNQISIGKRLTLVLGVILALFLASSVVAVVKLRQLGAEIDTVVNDNVKTERAGSDWLRHTTSGVQRAAA  
2154 IAKSSDASLIAYFAPATAASIRDTNELQKFIESKMVTPEEKQLFAKVGELRKHLYLAAREEVSKHKQAGDAD  
2155 AANKVFTERFEPTSRSYLAGVQQLVDGQRAQLDAAGKRSEDLRAQNTLLLQICTAVSLLLGLLAWLLANS  
2156 ITRPLRHAETIAEAIADMDLTGAPQSIYANDEPGRLLRALDLMRSAQLORSLLQVRGVVDSISTASTQIAIG  
2157 NQDLSARTEQATASSLQETASSMEELTSTVRQSADSAVQANQLATSAAQVAQRGGDVVSQVVTMDEINASS  
2158 KKISDIIGTIDGIAFQTNILALNAAVEAARAGEQGRGFVAVASEVRSLAQRSAAAKEIKTLIGVSVEKVE  
2159 SGSALVQNAGTTMDEIVSSVRRVTDIIGEISAAASEQSQGIGQVNVAVTQLDQMTQQNAALVEESTAAAES  
2160 LKEQAARLADVGAFFRLGASAGAPRLR  
2161 >Collimonas\_arenae\_1 |WP\_082797792.1 HAMP domain-containing protein  
2162 [Collimonas arenae]  
2163 MALANTRIGVRLAIGFTLILLVVVITGVGIWRLOQTGAAVNAMVVSQFLVRERLAAEWQDAVTINAVRTMA  
2164 VVRSNDSKTQQAFQSEMSATSERASELQTKLHGLSSEEGRQALGEIAAARAAYTELRESVLTTRQHGSAET  
2165 VNAMIEKELDPARKEYMAKQKFVDVQRKAIDDEALKIDANYRSGRILLIAFGSLAIIILGALLSWRLTAGI  
2166 VNPLQAAVAVARRVAAGDLTSTIEVKSDETQGLLQGIKEMNRALQDTSRVRNGTDNIVTASRQIAAGNL  
2167 ELSSRTEQQAASLEQTAASMEQLTSTVKQNADNARQANQLAENASSVALGGGRMVSEVVATMSQIKESSHK  
2168 INDIIGVIDGIAFQTNILALNAAVEAARAGEQGRGFVAVAAEVRNLAQRSAVAAKDIKLLIGDSVDKVDAG  
2169 NRQVDAAGKTMSEIVDSIRRVVDIMAEIAAASTEQSSGIEQVNQAVVQMDQATQQNAALVEEAAAAHSLQ  
2170 EQADELLQAVHIFNLADEEEMHPPGGSGKETVVSPLPTRQESSEVQFNDVNKVPFLAAAN  
2171 >Variovorax\_sp.\_R01\_1 |WP\_101489176.1 hypothetical protein [Variovorax  
2172 sp. R01]  
2173 MTFFSNLRIGTRLTLAFAIVLGLSIISSAVGLMSAHKNAEATRIMMQSPLAKERLIADWYVLTYSIAIARTS  
2174 MIARTTDEALPMLFADVISESVKKGTEMAKVEALLVTDEEKATYKSIVELRAKYQSAKDDVTRAKASGNT  
2175 VETVRAYQLSFQPAAKAYENRVLELLAIERRAIDDMSHAIDAANAKSFNLRLLLTALTIVLLGGLFAFFISR  
2176 SIVRPLAKAVGVAETVAAGDLSANIRVDSRDETQQLMQALKDMNANLAKVVGEVVRTGTETIATASGQIASG  
2177 NQDLSRTEEQASSLEQTAASMEELTSTVKQNADNARQANQLAVSASEVAVKGGAVVSQVVDTMGSINASS  
2178 KKIVDIIIGVIDGIAFQTNILALNAAVEAARAGEQGRGFVAVASEVRSLAQRSAAAAKEIKTLIGDSVEKVE  
2179 EGSKQVAEAGRTMEEIVGSVKRVTDIMGEITAASQEQTSGIEQINQAITQMDQVTQQNAALVEEASAAAQS  
2180 LQEQAQALVQAVSVFKLDANAVATTRASFRITPIPKPPKPTPKPRAKALPTRREPTGTPQLAMAGDAKGD  
2181 WSEF  
2182 >Variovorax\_sp.\_YR752\_3 |WP\_097198356.1 HAMP domain-containing protein  
2183 [Variovorax sp. YR752]  
2184 MKFLSNLRIGNRLAVAFIVLGLTVIISTAIALVSSRNNAEATRVMMQSPPLAKERLISDWYVLTYSIAIARTS  
2185 MIARTTDETLPVVFADVISDSVKKGSETIAKVEKLLVTEEEKAVLKSILDLRAKYQTAKDDVGGKAKASGNA  
2186 VDTARAFKESFQPAAKAYETRVLDLLSMERQAIIDMSQAIIDAANTRSFNLQLLLLTVLTVVSGGIFAFFISR  
2187 SIVRPLAQAVQVAETVAAGDLSMHIEVESRDEAGQLMQALKNMNANLAKVVGEVVRTGTETIATASGQIASG  
2188 NQDLSRTEEQASSLEQTAASMEELTSTVKQNADNARQANQLAVSASEVAVKGGSVVSQVVDTMGSINASS  
2189 KKIVDIIIGVIDGIAFQTNILALNAAVEAARAGEQGRGFVAVASEVRSLAQRSAAAAKEIKTLIGDSVEKVE  
2190 EGSKQVEEAGRTMDEIVGSVKRVTDIMGEITAASQEQTSGIEQINQAITQMDQVTQQNAALVEEASAAAQS  
2191 LQEQAQALVQAVSIFKLDDEGRQAAPRAQARTQPAKRVGSPLPATPQLAVAGAGAGDWREF  
2192 >Mitsuaria\_sp.\_PDC51\_2 |WP\_091731740.1 HAMP domain-containing protein  
2193 [Mitsuaria sp. PDC51]  
2194 MSNTNARGSIGRRLGMVQTGVLVIALIGSALGYWGLNRVAEQTAAMYTDIVTERAASDWYRNVFNNGTTRT  
2195 TAIAVSADPGLATFFFTQAAAEATKVSTELQQRDLKLLTKPEERATFDKVAELRKYTLTVRDAITAACKQGD  
2196 MAQAKQIFDEQFQKASSAYLDGIRAVAQQQRDLQAIQALAAATNERARIALVVFGLVALAAGGALAVWLT  
2197 RSITRPLGQAAQVADAIARFDLTGRIETRGSDETAQLLRALDAMQGSLLRLIGEVRGSTDSIGTASAEIAS  
2198 GNMDLSARTEQTASNQQAAAASLTQLTGTVRQTADAALTANQLASSAAETAQRGGSVMGQVVTMGEISDS  
2199 SRRIADIIGVIDGIAFQTNILALNAAVEAARAGEQGRGFVAVAGEVRSLAQRSAAAKEIKSLIATSVDV  
2200 ESGSRLVTDAGTTMTDIVTSVQRVTDIIAEIRAASQEQSDGINQVNAAVGHLDQMTQQNAALVEQAASAAE  
2201 SLKDQSKRLSAAIAVFRLA

2202 >Duganella\_sp.\_Leaf126\_1 |WP\_056156977.1 methyl-accepting chemotaxis  
2203 protein [Duganella sp. Leaf126]  
2204 MKFLTHTRIGTRLAAAFGIVLLLLLALVATTVGLLNARQQAAATRDMMEKPLAKERLVSVDWYVLMYSIAIRTE  
2205 LIARSSDTALPTVFADVIAASSKRGAEIMGKVKELVASDEERAMFDRIVVLRTNYQNLKTAVGNARKAGDA  
2206 AAAEKIFNDEFTPAAKAYTIAVEGLLTYQRKAIDDDTARAIDAANVRANGLLLLLLTVLMVTIGSAAAWIITR  
2207 SITAPLKSAVDIAATVARGDLTTRFDASVQRSEIGELMTALKGMNDALRNVVSQVQTGTRTIASASQEIAA  
2208 GNLDSLQRTEEQASSLEETASSMEELTSTVRQNADNARQANQLVKTASDVAEKGGAIVSQVVDTMGSINDA  
2209 SRKIYDIISVIDGIAFQTNILALNAAVEAARAGEQGRGFVAVSEVRNLAQRSAGAAKEIKELIGNSVEQV  
2210 DIGARLVQDAGTTMDEVVASVRRVTDIMGEISSASSEQSIGIDQVNSAITQMDQVTQQNAALVEEAAAAAS  
2211 SMQEQAERLAEVAASFRLEPGAVVTPAAHRPAPASQLATASATASHRPAHGPAKSPASRLTMKSTITSPI  
2212 PPAEPPKATASRKPATVGSDDSDWEEF  
2213 >Variovorax\_sp.\_OV329\_1 |WP\_093384234.1 HAMP domain-containing protein  
2214 [Variovorax sp. OV329]  
2215 MEFLENMRIGRRLAVGFGLVLIILSLASTAFTLVSLRSSAQTQRTVLGPLAKERLVSVDWYVLTYSIAIRTE  
2216 LIARSSDAQLSNTFAEVIAASSKKGSETMAKVAPLLDDEERAIKFKHIGELRVKYQGAKELVMNAKTAGDA  
2217 ALAERQFNEVFMPAAKAYEKRVLELLSHERGTIDEAVRVGREATERFQMLMLLAVALIAGVLASLLISR  
2218 SITRPLREAVGVAKAVAGGDLGSRIESNSKDETGQLLALREMNTSLVRIVSEVRSGTDTIATASGQIASG  
2219 NQDLSRTEEQASSLQETAASMEQLTSTVKQNADNARQANQLAESASEVAVKGGEVVGVVHTMASINASS  
2220 KKIVDIIGVIDGIAFQTNILALNAAVEAARAGEQGRGFVAVSEVRSLAQRSAAAAKEIKGLIDDSVGKVQ  
2221 AGSELVGEAGQTMQEVSSVKRVSDIIGEITAASHEQTQGIEQINQAITQMDQVTQQNAALVEEAAAAAQS  
2222 MQEQAGSLVHAVSVFRLARA  
2223 >Variovorax\_paradoxus\_10 |WP\_019658724.1 methyl-accepting chemotaxis  
2224 protein [Variovorax paradoxus]  
2225 MKFKDLRISTRGLGFVAMLLLVACMAGIGLWRLAHVSQATERMMTQALTKERLAGEWQSTLRSNSVATIA  
2226 MIKAPDTRLEAYFAKLQSTGMERISSVQKEFQSKLSTPEEKALYEQVMVARTKVREIVTNLTMLKDRGQIE  
2227 EAQKMDVDTTFSEALAAYGSAVDKVDQHQHDEIDAAARDIAEDYFSGRIMLLSLAAVAVVLGALFAWRLSAG  
2228 IVRPLRHAVEAAETVASGDLRVDIRVENRDEVGQLMQALKDMNTSLAKVVGEVRLGTDTIATASSQIASGT  
2229 QDLSRTEEQASSLEQTAASMEELTSTVKQNADNARQANQLAVFASEVATKGGMVVSQVVDTMGSINASSR  
2230 KIVDIIGVIDGIAFQTNILALNAAVEAARAGEQGRGFVAVSEVRSLAQRSAAAAKEIKTLIGDSVEKVEE  
2231 GSKQVEEAGRTMDEIVGSVKRVTDIMGEITAASQEQTSQIEQINQAITQMDQVTQQNAALVEEASAAAQSL  
2232 QEQAGSLVQTVGIFKLDPAAGAMRRPGFSPIAPIAKPTKPAKAISPRGEKGGNPMHQLVMSGADGNEWTF  
2233 >Collimonas\_sp.\_OK412\_2 |WP\_092398824.1 HAMP domain-containing protein  
2234 [Collimonas sp. OK412]  
2235 MNFANTRIGVRLSIGFTAILLVVAITGIGIWRLQQTGAAVDAMVSQFLVRERLAAEWQDAVAVNAVRTMA  
2236 VVRSDDSKTKQIFQAEMSATSERASALQTKLHGLSDDQGRQALGEIAAARAAYTEMRDVTLTTRQYGSAES  
2237 AVAMIEKDLDPARKEYLEKLQKQFVGVQRQAIDEAALDIAANYRAGRNLVTFGAIAIFLGAFAWRLTAGI  
2238 VKPLHAAVAVAQRVAKGDLGASIEVKGKDETGQLLLGIREMIFSLRDTVSRVRNGTESIVTASRQIAAGNQ  
2239 DLSSRTEEQAASLEQTAASMEQLTSTVRQNADNARQANQLAENAASVALGGGMVSEVVATMALIRDSHQ  
2240 ISDIIGVIDSIAFQTNILALNAAVEAARAGDQGRGFVAVAAEVRNLAQRSABAADIKVLIIGASVDKVDAG  
2241 GRQVDAAGAAMSEIVASIRRVVDIMAEIAAASEQSSGIEQVNVQAVGQMDQATQQNAALVEQAAAAHSLQ  
2242 EQAGELLQAVSIFQLAEDAAYSMPERQDSGPAEAAADMPEEHHAGSRPVLVSIN  
2243 >Variovorax\_sp.\_URHB0020\_1 |WP\_028253133.1 HAMP domain-containing  
2244 protein [Variovorax sp. URHB0020]  
2245 MKDWKIGTRLGGGFALVLAIVAIAGIGVMRLQSVGEATREMARGSLERLAGSWLLSTSTNSVRTFALL  
2246 KSEDAEVQEFQKNISKTSAFISENQKKEEVLSSPEELALSADIKKKRAEYVDLRNVILKCLKSEGNLAEA  
2247 KRLSGEKLLSTLESYDASIRAMLSHQQAQIDQSASTIDALYRSGRNLVILAALALAVGSVLAWTLTRSIV  
2248 QPIDEALLIAETVASGDLKFEFETQRGGDFGRLLRGMGEMEDTLTDLVSRIKIATDSIVVASKEIAAGNQD  
2249 LSSRTEEQASSLEQTAASMEELTSTVKQNADNARQANQLAASASEVAVKGGSVVSQVNTMASINASSKKI  
2250 VDIIGVIDGIAFQTNILALNAAVEAARAGEQGRGFVAVAAEVRNLAQRSAAAAKEIKGLIDDSVGKVDVGS  
2251 ALVGEAGRTMEEIVGSVKRVTDIMGEITAASQEQTSQIEQINQAITQMDQVTQQNAALVEEAAAAAASLQE  
2252 QAGGLSQIVSTFKLDDEEAAAPAVVPSRPAVVARSPSRPPAPPSVVTTHRTRQSTAPKLAASHTSNGDWT  
2253 EF  
2254 >Thiobacillus\_denitrificans\_1 |WP\_011312132.1 methyl-accepting  
2255 chemotaxis protein [Thiobacillus denitrificans]  
2256 MKIGARLGLGFASVLLLLLVVAVIGVWRLQTVGMMTDSLKVNEMHKARIINWESIINANAVRALAAAKTN  
2257 NPETEKFFVDASAAASKGGIALQKQLESLLTDAESRALFAAIADKRSAYLAARDAALKEKAAGNVLGAKKF  
2258 VDEDMKPRLDAYLES LHD LARYQKQAI DATAGNIHRQYESGRMLLIGLSIVALMMGIGFAFWITRSITRPM

2259 NQAVKVAQTVAAGDLTSRIEVEGKDETGRLLQALKDMNDSLKIVGQVRLGTDATASSEIATGNLDLSS  
2260 RTEEQASSLEETASSMEQLTSTVKQNADHARQANQMAVSASEVAVKGGAVVAQVVDVTMGSINESSRKIVDI  
2261 IAVIDGIAFQTNILALNAAVEAARAGEQGRGFVAVVASEVRSLAQRSAGAAKEIKTLIGDSVEKADIGSKLV  
2262 GQAGATMDEIVASVKRVTDIMGEITAASQEQSAGIEQVNQAIQMDQVTTQNAALVEEAAAAASSMQDQAA  
2263 NLAEAVSVFRLAGVNTQRPEQLTSNERIAALPARTHTAAAPVVRTKKLAAIQGSSGGEEF  
2264 >Herbaspirillum\_aquaticum\_4 |WP\_088755470.1 HAMP domain-containing  
2265 protein [Herbaspirillum aquaticum]  
2266 MKNLKGIVRLAIGFIALMLMAMVGLGVWRLGNIGDATDEMTQIALKKERDAVQWHAAIKENGVRTFAVM  
2267 KSDDDAFQYFQKQIDAQSAKISQLQKQVEAAITDPEEKRLFAEVGKLRRAAYRDRQKIFDIKTAGDDARA  
2268 REMTDTTLVKMMDEYADSVLRYADYQKKVIDQAAAEINGDYRSGRSMLLMLGALEIVLGAALAWLLTRSIT  
2269 RPLNQAVSIAETVAAGDLTSRIEANSRDETGQLLAALKSMNGNLQDIVGRVRSRGTDTINVASREIATGNLD  
2270 LSARTEQAGSLEETASAMEQLTSTVKQNADNARQANALASASQVASQGGAVVEQVATMGEIHASSQKI  
2271 ADIIGVIDGIAFQTNILALNAAVEAARAGEQGRGFVAVVASEVRSLAQRSASAAKEIKQLIGDSVEKVDGDS  
2272 RLVAQAGDTMQEVVHSVARVTEIVREITLASQEQSDGIEQVNLAIITHIDEATQQNAALVEEAAAAARSMQD  
2273 QAASLTEAVSVFRLDTSVALPGAQAQRGTSPSTVVR  
2274 >Bordetella\_genomosp.\_8\_1 |WP\_086066325.1 HAMP domain-containing  
2275 protein [Bordetella genomosp. 8]  
2276 MDFLSNIRIGTRLAIGFMLVLALSIGSTAFALIEARHNAEETRLMMEKPLTKERITADWYVFIYSAIARTA  
2277 MIAKSTDGTLSDVFADVIADSVKQGGALLKSLEELISNDEERKLYQASVDGRNAYQKAKNDVMAAKMAGDA  
2278 AKADRAYTQSFLPTAKAYQESVQAFRAYQKQINAIASADIAANERSMGLLMLLGAACAVVITR  
2279 SITRPLRSIAIVANRAAEGDLTARIATTSKDEIGDLIRAMETMNRGLKEIVRDVKSQTDLINNASAEIASG  
2280 NLDLSSRTEQQAASLEETAASMEELTATVKQNAENARQANQLAVSASQVAARGGAVVKNMISTMGAI DGSS  
2281 RKIVDIIGVIDGIAFQTNILALNAAVEAARAGEQGRGFVAVVASEVRNLAQRSASAAKEIKSLIDDSVSNVV  
2282 AGNKLVAETGGTMDEVVGNIRQLAEMMNEIVAASQEQSTGIEQVNIASIQMDQATQQNAALVEQAAAASS  
2283 LRDQADTLGRVVSFRIDAADTGNAANASLGMSGHAHTLLARPDDAYVAAA  
2284 >Polaromonas\_sp.\_JS666\_1 |WP\_074580422.1 HAMP domain-containing protein  
2285 [Polaromonas sp. JS666]  
2286 MFLGNLSIGKRLAVVVGLLILFLTSSVLAVLKLSQLGEEIKAMVEKNIKTERAGSDWLRHTTAGIQRAAA  
2287 IAKSSDVGLVAYFAPASATS IKNTNELQKFLEQQMDTPEKKQLFDKVGELRKVYLAAREDVSKAKQAGDME  
2288 GANRIFNERFEPTSRDYLAGVQKMVDTERELLDDAAQRGEALRARISLLLVVCSVSVSLGLGALLLWLLVRS  
2289 ITRPLSNVQVARAVAAGDLTSRIEVESQDETQQLMQALKDMNDALVGIVGNVRSRGTDTIATASSEIAAGN  
2290 HDLSSRTEQQAASLEETAASMEELTSTVKQNADNARQANQLAVSASSVAVKGGTVVAEVVGTMGAINASSR  
2291 KIVDIIGVIDGIAFQTNILALNAAVEAARAGEQGRGFVAVVASEVRNLAQRSASAAKEIKTLIDDSVSKVEE  
2292 GSSQVAEAGKTMDEIVDSVKRVTDIMAEITAASQEQSTGIEQINQAITQMDQVTTQNAALVEQAAAASSL  
2293 QEQAGSLSDAVSVFKVEGGHVT PARRPAASRPAATPKQPPQARQAIASRKAVPASGELAVAGGSWETF  
2294 >Herbaspirillum\_sp.\_WT00C\_4 |WP\_075256362.1 HAMP domain-containing  
2295 protein [Herbaspirillum sp. WT00C]  
2296 MKNLKGIVRLAIGFIALMLMAMVVALGVWRLGSGDATDDMTRIALKKERDAVQWHAAIKENGVRTFAVM  
2297 KSDDDAFQYFQKQVDAQSARISQLQKEVEAAITDAEEKRFLFDEVGKLRRAAYRATRQSFIDVKTAGDDARA  
2298 REMTDTTLVKMMDDYANSVLRADYFQKQVIDQTAAEINRDYRSGRSMLLALGAIEIVLGAALAWLLTRSIT  
2299 RPLNQAVTIAETVAAGDLTSRIDSSRDETGKLLAALKTMNGNLLDIVGRVVMGTETINTASREIATGNLD  
2300 LSARTEAQAGSLEETASAMEQLTSTVKQNADNARQANELAASASQVATQGGAVVDQVATMGAIHASSQKI  
2301 ADIIGVIDGIAFQTNILALNAAVEAARAGEQGRGFVAVVASEVRSLAQRSASAAKEIKQLIDDSVEKVDGDS  
2302 RLVARAGDTMQEVVQSVARVTEVVREITLASQEQSDGIEQVNLAIITHIDETTQQNAALVEQAAAAARSMQD  
2303 QAASLTDVAVSVFRLDQVLAVALVQRGTSPSTVVR  
2304 >Bordetella\_genomosp.\_11\_1 |WP\_094843473.1 HAMP domain-containing  
2305 protein [Bordetella genomosp. 11]  
2306 MRFLSNIRIGTRLAIGFVLVLVLSIGSTGFALI QARDNATETRLMMEKPLTKERITADWYVFIYSAIARTA  
2307 LIAKSTDTTLSDVFADVIADSVKQGGALLKSLEDLISSTDEERKLYQTSVNGRNAYQKAKNEVMAAKMKGDA  
2308 AEADRVTQSFLPTAKAYQESVQAFRAYQRTQINAIASASIAANARSIDLMLFVLLVMLGAACAIITR  
2309 SITRPLRSIAIVANRAAKGDLTAQIAPASTDEIGDLMRALETMNRGLKAIVRDVKSQTELINNASAEIASG  
2310 NLDLSSRTEQQAASLEETAASMEELTATVKQNAENARQANQLAVSASQVAVRGGTVVKDMISTMGAI DGSS  
2311 RKIVDIIGVIDGIAFQTNILALNAAVEAARAGEQGRGFVAVVASEVRNLAQRSASAAKEIKSLIDDSVSNVV  
2312 AGNKLVAETGGTMDEVVANIRHLAEMMNEIVAASQEQSSGIEQVNIASIQMDQATQQNAALVEQAAAASS  
2313 MRDQADTLERVVSFRIDARDAFDDAVALGTSGAAPRSGDAYIAVA  
2314 >Variovorax\_sp.\_R01\_2 |WP\_101489172.1 hypothetical protein [Variovorax  
2315 sp. R01]



2316 MTIKNWTGMRGAGFALVLLVAVAGIGVLRRLQGVGEATQDLASRTLKERLATAWQLGTATNSVRTFS  
2317 LLKSDDAQVQAYLQKQIAATSATISSETQTALEALLSTPEELALSADIQKRRGDYIALRKQILQLKADGQKD  
2318 EAATRTDTQLLPLMDGYDASIRAMVTHQQKHIDRTAAAI DAQYRAGRLYIVALAAAALALGAVLAWLLTRS  
2319 IAQPIAEALLIAETVASGDLSQEFETDRGGDFGRLLRGMGEMEDTLTDLVTRIKASTDSIAVASRQIAAGN  
2320 QDLSSRTEEQASSLEQTAASMEELTSTVKQNADNARQANQLAVSASEVAVKGGAVVSQVVDTMGSINASSR  
2321 KIVDIIIGVIDGIAFQTNILALNAAVEAARAGEQGRGFVAVSEVRSLAQRSAAAAKEIKTLIGDSVEKVEE  
2322 GSKQVAEAGRTMEEIVGSVKRVTDIMGEITAASQEQTSGIEQINQAITQMDQLTQQNAALVEEASAAQSL  
2323 QEQASNLVEAVSTFKLDADEAVVA  
2324 >Duganella\_sp.\_HH105\_5 |WP\_070357647.1 HAMP domain-containing protein  
2325 [Duganella sp. HH105]  
2326 MNNLKIGTRLGFGFSLILLTAMTIIIGILRLSSASSMTHMINVKIRDERLIAEWGKIEVNAARTTGAW  
2327 MVADPADQKTLEGMMAESSGRATKIQDQIGADIEDEELKPLFQKVLETRKAYTEIRKSVFAAKNAGDLEKG  
2328 KKLYETDMAQSRTLYLDALKKFADRQGALLDQAAVDIQQQYTSGRLLMLLGVAAIILGVTAAWWITRTIT  
2329 QPINEAVKVAETVSSGDLTSDIQVGSNDETGQLMTALKNMNTNLVNIQVRSQVSGTDLMAHASTEIAAGNHD  
2330 LSSRTEEQASSLQETASSMEQLTSTVRFNAENAREANKLAVNASEIASRGGAVVGEVHTMGSINDSSRKI  
2331 VDIIISVIDGIAFQTNILALNAAVEAARAGEQGRGFVAVSEVRNLAQRSAAAADIKGLIDDSVQKVALGS  
2332 DLVDKAGQTMSEIVDSIGRVTQIMNQISNASEEQSIGIAQVNDAITQMDQVTQQNAALVEQAAAAESMQE  
2333 QSAKLADVSVFKLDAQAQMAVKTALPPARPAAPVAVPKTRPAPTVAAPARKALAAAPKRATVASSES DGWEE  
2334 F  
2335 >Polaromonas\_sp.\_CG9\_12\_1 |WP\_081932374.1 HAMP domain-containing  
2336 protein [Polaromonas sp. CG9\_12]  
2337 MNIKNLIRIGSRLALGFGVLLLSIIISGLGIWRLQEVGSAADAMAKRALVKERIAAEWLVTSTNSIRTF  
2338 LVKSTDAADQQYFQKQIAQTS LGITENSKKLFLLD TAE EKALFEEGVAKRAAYVGLR TSI M K L K A E G Q N A  
2339 EVAQLTEEKLVPAALSAYDASIKNMLLHQKTTIDQTVMAINALYRSGQF SVLVLAAMALGLGAF LSWRLTRG  
2340 ITLPLSEALLVAKTVAAGDLTSRIEVTSKDETGQLMQALKDMNDSL SRVVGEVRQGTDTIATASSQIAAGN  
2341 QDLSSRTEEQASSLEETAASMEELTSTVKQNADNARQANQLAVSASSVAVRGGAVVSQVVDTMSAINASSK  
2342 KIVDIIIGVIDGIAFQTNILALNAAVEAARAGEQGRGFVAVSEVRNLAQRSAAAADIKGLIDDSVQKVEE  
2343 GSKQVAEAGKTMDEIVGSVRRVTDIMAEIQAAASQEQTQIEQINQAITQMDQVTQQNAALVEEAAAAQSL  
2344 QEQAGGLSQVVGVFRLNPAAHREQPATRPHSARRAGAAGPTAFAFKQAPAPRHALAVPKASPSLASNSPAA  
2345 PSRRPAVAAAANSGTGEWEEF  
2346 >Janthinobacterium\_sp.\_61\_5 |WP\_101482122.1 hypothetical protein  
2347 [Janthinobacterium sp. 61]  
2348 MKNLKIGVRLGGFAFAVLLLSLTSLTVVGVQMQSASKETDLVNVKVRNERLIAEWTKVIEVNAARTAAAW  
2349 KVSDPEHQKQFEKEMAVSSARATEIQNDIGKSELNTEEALYQEV LSTRKAYTEVRKNVFKAKNAGDLELG  
2350 KRLYEGEMVAKRDIYLAALKKLEVL EARLLDEAAAQIRSRYESGRLLLSL GALA ILLGIACAYWITRSIT  
2351 RPITRAVQVAEAVSAGDLTSHIVVESHDETGQLMHALKNMNDKLVSIQVQVRAGTESISTASSEIAAGNLD  
2352 LSSRTEEQASSLEETASSMEELTSTVKLNADNARSANQLAIDASQIASKGGVVSEVSTMG SINDSSRKI  
2353 VDIIISVIDAIAFQTNILALNAAVEAARAGEQGRGFVAVSEVRNLAQRSAAAADIKGLIDDSVQKVEAGS  
2354 QLVDKAGRTMDEIVQSI SHVTQIMNQITDASDEQRAGIEQVNQAIQMDQVTQQNAALVEEAAAAESMQE  
2355 QAAKLAEVVGVFKLDATQQYVSTRAASSVKASAPARTAMRPAVQAAVRRAPAQPVAAPAEAMRRAPKAPV  
2356 ASGADEWEEF  
2357 >Janthinobacterium\_sp.\_BJB426\_4 |WP\_099378255.1 HAMP domain-containing  
2358 protein [Janthinobacterium sp. BJB426]  
2359 MKNLKIGVRLGGGFAAVLFLLSLTSLTVVGVQMQSASKETDALVNVKVRNERLIAEWTKVIEVNAARTAAAW  
2360 KVSDPEHQKQFEKEMAVSSARATEIQNDIGKSEL SADEALYQEV LSTRKAYTEVRKNVFKAKNAGDLELG  
2361 KRLYEGDMAVKRDIYLAASLKKLELLEAKLLDETAQAQIRSRYENGRLLLSLGVVA ILLGIACAYWITRSIT  
2362 RPITRAVEVAEAVSAGDLTSHIVVSRDETGQLMHALKNMNDKLVSIQVQVRAGTESISTASSEIAAGNLD  
2363 LSSRTEEQASSLEETASSMEELTSTVKLNADNARSANQLAIDASQIASKGGVVSEVSTMG SINDSSRKI  
2364 VDIIISVIDAIAFQTNILALNAAVEAARAGEQGRGFVAVSEVRNLAQRSAAAADIKGLIDDSVQKVEAGS  
2365 QLVDKAGRTMDEIVQSI SHVTQIMNQITDASDEQRAGIEQVNQAIQMDQVTQQNAALVEEAAAAESMQE  
2366 QAARLAEVVGVFKLDATQQYVAASAGPSMTASAPIKAATRVAMQAAARPAIRPAKRQAPASAVTASTSDKA  
2367 APVEAMRPRAPKAPVASGADEWEEF  
2368 >Janthinobacterium\_sp.\_RA13\_4 |WP\_035820608.1 methyl-accepting  
2369 chemotaxis protein [Janthinobacterium sp. RA13]  
2370 MKNLKIGVRLGGGFAAVLFLLSLTSLTVVGVQMQSASKETDALVNVKVRNERLIAEWTKVIEVNAARTAAAW  
2371 KVGDPHQKQFEKEMAVSSARATEIQNDIGKSELNAEEQSLYQEV LSTRKAYTEVRKNVFKAKNAGDLELG  
2372 KRLYEGDMAVKRDIYLAASLKKLELLEAKLLDETAQAQIRSRYESGRLLLSLGGVA ILLGIACAYWITRSIT

2373 RPITRAVEVAEAVSAGDLTSHIVVESRDETGQLMHALKNMNDKLVSVIGQVRAGTESISTASSEIAAGNLD  
 2374 LSSRTEEQASSLEETASSMEELTSTVKLNADNARSANQLAIDASQIASKGGVVVSEVSTMGSIINDSSRKI  
 2375 VDIISVIDAIAFQTNILALNAAVEAARAGEQGRGFVAVSEVRNLAQRSSAAAKEIKGLIDDSVQKVEAGS  
 2376 QLVDKAGRTMDEIVQSI SHVTQIMNQITDASDEQRAGIEQVNQAIGQMDQVTQQNAALVEEAAAAAESMQE  
 2377 QAAKLAEVVGVFKLDATQQYVSASAGPSVTAPAPAAAMRAAMRPAIQPAKRRAPAPAVTAPTPGKAAQADAA  
 2378 RARAPKAPVASGADEWEEF  
 2379 >Acidovorax\_delafieldii\_2 |WP\_085943602.1 HAMP domain-containing  
 2380 protein, partial [Acidovorax delafieldii]  
 2381 MNQLRIAHKLWLA VVLIVIMLVLVVGFSGYRS AKVQAQADAVAREMETRVAAAIRWAGLTETNAARTQALI  
 2382 VSSDSAVEAEFKDVI PATSAQISEVQKSLEGM SLSEADRAQMAKIAAARKAMTDLRAQARQLKADGQAEQA  
 2383 VALIKQSYNPAVAAYLQTLRDFVQMQQTAQASLADMAASRMLTVKIAAVAVAALLLAI IAGAYFLIRSIQ  
 2384 QPLALANDLAARIAGGDL SMQGTVTRGDEFGLLRSQYAMSDALGRVVRVHRVQSTDSIALASAEIASGNHD  
 2385 LSARTEQTSSNLQQTAAAMEQFTSTIQQSAGSAQQASSLATGATGVARRGGEVVTQVVSTMEEIQHSSKKI  
 2386 ADIIGVIDGIAFQTNILALNAAVEAARAGEQGRGFVAVSEVRSLAQRSAEAAAKEIKQLINTSVEKVD TGS  
 2387 RLVADAGTTMADIVQSVQRVTD MIGEITAASTEQSAGIAQVNQAVGNLDQMTQQNAALVEESAAAAQSLRE  
 2388 QAEQLAQVVS VFKV NAGRQAAQPLVAAAKPAASRPSAAVQ  
 2389 >Janthinobacterium\_sp.\_TND4EL3\_4 |WP\_076567014.1 HAMP domain-containing  
 2390 protein [Janthinobacterium sp. TND4EL3]  
 2391 MKNLKIGVRLGGGF AAVLLLLLTS LTVVGVIVQM QSASLET DQLVNVKVRNERLIGEWTKVIEVNAARTAAAW  
 2392 KVSDPEHQKQFEKEMAVSSARATEIQNDIGKSEL SAEQALYQEV LSTRKAYTDVRKDVFKAKNAGDLELG  
 2393 KRLYEGDMAVKRDIYLAALKK LAVREARLLDE TAAQIRARYENGRLLLLISLGMAAMLLGIACAYWITRSIT  
 2394 RPITRAVQVAEAVSAGDLTSHIVVESRDETGQLMHALKNMNDKLVSVIGQVRS GTESISTASSEIAAGNLD  
 2395 LSSRTEEQASSLEETASSMEELTSTVKLNADNARSANQLAIDASQIASKGGAVVSEVSTMGSIINDSSRKI  
 2396 VDIISVIDAIAFQTNILALNAAVEAARAGEQGRGFVAVSEVRNLAQRSSAAAKEIKGLIDDSVQKVEAGS  
 2397 QLVDKAGRTMDEIVESIGHVTQIMNQITDASDQQRSGIEQVNQAIGQMDQVTQQNAALVEQAAAAAESMQE  
 2398 QAARLAGVVG VFKLDATQQYVASSASPVVAPV PVPKPAIRRAAASAVAAPATGKAAPAEAVRTRTPKAP  
 2399 VASSADEWEEF  
 2400 >Janthinobacterium\_sp.\_ROICE36\_5 |WP\_102122362.1 hypothetical protein  
 2401 [Janthinobacterium sp. ROICE36]  
 2402 MKNLKIGVRFGGFAFAAVLLLLLTS LTVVGVIVQM QSASKETD TLVNVKVRNERLIAEWTKVIEVNAARTAAAW  
 2403 KVSDPEHQKQFEKEMAVSSARATEIQNDIGKSEL NAEQALYQEV LSTRKAYTEVRKNVFKAKNAGDLELG  
 2404 KRLYEGDMAAKRDIYLAALKK LEVLEARLLDE AAAHIRSRYENGRLLLLISLGAVAILLGIACAYWITRSIT  
 2405 RPITRAVEVAVAVSAGDLTSHIVVESRDETGQLMHALKNMNDKLVSVIGQVRAGTESISTASSEIAAGNLD  
 2406 LSSRTEEQASSLEETASSMEELTSTVKRNADNALSANQLAIDASQIASKGGVVVSEVSTMGSIINDSSRKI  
 2407 VDIISVIDAIAFQTNILALNAAVEAARAGEQGRGFVAVSEVRNLAQRSSAAAKEIKGLIDDSVQKVEAGS  
 2408 QLVDKAGRTMDEIVQSI SHVTQIMNQITDASDEQRAGIEQVNQAIGQMDQVTQQNAALVEEAAAAAESMQE  
 2409 QAAKLADVVGVFKLDV TQQYVSASVSARPAAGQ PAARRAVNAAARTSASTVVAR SASGPVKAVKPD TAHTS  
 2410 KPRTPVASGADEWEEF  
 2411

2412 **References**

2413 Hanahan, D. (1983) Studies on transformation of Escherichia coli with plasmids. *J Mol*  
 2414 *Biol* **166**: 557-580.  
 2415 Kovach, M.E., Elzer, P.H., Hill, D.S., Robertson, G.T., Farris, M.A., Roop, R.M., 2nd,  
 2416 and Peterson, K.M. (1995) Four new derivatives of the broad-host-range cloning  
 2417 vector pBBR1MCS, carrying different antibiotic-resistance cassettes. *Gene* **166**:  
 2418 175-176.  
 2419 Ni, B., Huang, Z., Fan, Z., Jiang, C.Y., and Liu, S.J. (2013) *Comamonas testosteroni* uses  
 2420 a chemoreceptor for tricarboxylic acid cycle intermediates to trigger chemotactic  
 2421 responses towards aromatic compounds. *Mol Microbiol* **90**: 813-823.  
 2422 Wu, J.F., Jiang, C.Y., Wang, B.J., Ma, Y.F., Liu, Z.P., and Liu, S.J. (2006) Novel partial  
 2423 reductive pathway for 4-chloronitrobenzene and nitrobenzene degradation in  
 2424 *Comamonas* sp. strain CNB-1. *Applied and environmental microbiology* **72**:  
 2425 1759-1765.  
 2426
